# Supplementary material for: EARN: an ensemble machine learning algorithm to predict driver genes in metastatic breast cancer
Source: BMC Med Genomics. 2021 May 7;14:122. doi: 10.1186/s12920-021-00974-3 (PMC8105935; doi:10.1186/s12920-021-00974-3)
Supplement: Supplementary file 4 — Additional file 4: Table S4–S7. List of positive/negative gene set for BRCA and MBCA. Table S8–S10. Homo_sapiens genes for BRCA and MBCA [file 12920_2021_974_MOESM4_ESM.xls]

## Sheet: Table S4
EARN: an ensemble machine learning algorithm to predict driver genes in metastatic breast cancer
Leila Mirsadeghi1, Reza Haji Hosseini1*, Ali Mohammad Banaei-Moghaddam2, Kaveh Kavousi3*
* Correspondence: kkavousi@ut.ac.ir; hosseini@pnu.ac.ir;
1Department of Biology, Faculty of Science, Payame Noor University, Tehran, Iran
2 Laboratory of Genomics and Epigenomics (LGE), Department of Biochemistry, Institute of Biochemistry and Biophysics (IBB), University of Tehran, Tehran, Iran
3 Laboratory of Complex Biological Systems and Bioinformatics (CBB), Department of Bioinformatics, Institute of Biochemistry and Biophysics (IBB), University of Tehran, Tehran, Iran
Additional file 4: Table S4 40 genes as positive training data for BRCA
AKT1
ARID1A
ARID1B
ATM
BAP1
BARD1
BRCA1
BRCA2
BRIP1
CASP8
CCND1
CDH1
CDKN1B
CHEK2
CTCF
EP300
ERBB2
ESR1
ETV6
FLNA
FOXA1
GATA3
IRS4
KRAS
MAP2K4
MAP3K1
MAP3K13
NCOR1
NOTCH1
NTRK3
PALB2
PBRM1
PIK3CA
PPM1D
RB1
SMARCD1
TBX3
TP53
ZFHX3
ZMYM3

## Sheet: Table S5
EARN: an ensemble machine learning algorithm to predict driver genes in metastatic breast cancer
Leila Mirsadeghi1, Reza Haji Hosseini1*, Ali Mohammad Banaei-Moghaddam2, Kaveh Kavousi3*
* Correspondence: kkavousi@ut.ac.ir; hosseini@pnu.ac.ir;
1Department of Biology, Faculty of Science, Payame Noor University, Tehran, Iran
2 Laboratory of Genomics and Epigenomics (LGE), Department of Biochemistry, Institute of Biochemistry and Biophysics (IBB), University of Tehran, Tehran, Iran
3 Laboratory of Complex Biological Systems and Bioinformatics (CBB), Department of Bioinformatics, Institute of Biochemistry and Biophysics (IBB), University of Tehran, Tehran, Iran
Additional file 4: Table S5 2151 genes as negative training data for BRCA
A4GALT
A4GNT
AAGAB
AANAT
ABHD1
ABHD14A-ACY1
ABHD14B
ABHD15
ABHD17A
ABHD17B
ABHD5
ABHD6
ABHD8
ACADL
ACAP3
ACBD6
ACBD7
ACER1
ACOT1
ACOT12
ACOT13
ACOT7
ACTL10
ACVRL1
ACY3
ADAMTSL5
ADAP1
ADAT1
ADGRF4
ADH4
ADI1
ADIG
ADIPOR1
ADK
ADPRM
ADRA1B
AEN
AGA
AGPAT1
AGPAT5
AGTRAP
AHDC1
AHSG
AIF1
AIMP1
AIMP2
AIPL1
AIRE
AK2
AKAP7
AKIP1
AKIRIN2
AKR1B1
AKR1B15
AKR7A2
AKR7A3
AKR7L
AKT1S1
ALDH1A2
ALDH1B1
ALDH6A1
ALG14
ALG9
ALS2CR12
AMH
AMMECR1
AMN
AMOTL2
AMPD2
AMT
AMTN
AMY1C
ANAPC10
ANAPC2
ANKDD1B
ANKEF1
ANKHD1
ANKLE1
ANKRD18B
ANKRD20A1
ANKRD20A2
ANKRD39
ANKRD65
ANKS3
ANTXR2
ANTXRL
ANXA8
AP1AR
AP1M1
AP1S2
AP2S1
AP3S1
AP4S1
AP5Z1
APEH
APOA5
APOC1
APOC2
APOC4
APOD
APOL1
APOL4
APOLD1
APOO
APOPT1
AQP4
AQP7
AQP9
ARC
ARF4
ARGFX
ARHGAP11B
ARHGEF35
ARHGEF37
ARL10
ARL14EP
ARL16
ARL5A
ARL6
ARL6IP1
ARL6IP4
ARL8B
ARL9
ARNTL2
ARPC4
ARRB2
ARSA
ARSI
ART3
ART4
ARX
ASAH1
ASAH2B
ASB11
ASB8
ASCL1
ASCL3
ASNA1
ASPDH
ASRGL1
ATE1
ATF7
ATG9B
ATOH7
ATP11AUN
ATP1B2
ATP6AP1L
ATP6AP2
ATP6V0C
ATP6V1G1
ATP6V1G2
ATXN1L
ATXN7L3B
AUH
AVEN
AVPR1A
AZIN2
B3GALT1
B3GAT2
B3GAT3
B3GNT6
B4GALNT1
B4GALT2
B9D2
BAALC
BARHL1
BASP1
BATF
BBS12
BCAS4
BCL2L15
BCL7B
BCL7C
BEST4
BET1L
BIVM
BLOC1S5
BLVRB
BMP8A
BMP8B
BNIP1
BOD1L2
BOLA3
BPI
BPIFA1
BPNT1
BRAT1
BRI3
BRI3BP
BRK1
BTF3L4
BTG4
BUD31
C10orf55
C11orf54
C11orf80
C11orf87
C11orf88
C12orf42
C12orf45
C12orf57
C12orf65
C12orf77
C14orf178
C15orf32
C15orf61
C15orf62
C16orf46
C16orf90
C17orf107
C17orf58
C19orf24
C19orf33
C19orf38
C19orf48
C19orf71
C1orf115
C1orf131
C1orf189
C1orf194
C1orf210
C1orf216
C1orf54
C1orf56
C1orf68
C1QB
C1QL1
C1QTNF5
C1QTNF6
C2
C20orf141
C20orf197
C20orf203
C20orf78
C21orf62
C22orf31
C22orf34
C2orf50
C2orf70
C2orf72
C2orf80
C3orf14
C3orf62
C3orf84
C4A
C4orf33
C4orf45
C5orf24
C5orf38
C5orf46
C5orf49
C5orf56
C5orf63
C6orf203
C6orf226
C6orf47
C7orf33
C7orf50
C7orf65
C7orf66
C7orf71
C8G
C8orf37
C8orf59
C9orf153
C9orf16
C9orf170
C9orf47
C9orf62
CA3
CA5B
CA6
CA7
CA8
CAAP1
CABP1
CABP4
CACNG2
CACNG6
CALB2
CALHM3
CALML5
CAMK1D
CAMK2N2
CAMLG
CAPSL
CARD18
CARS2
CARTPT
CASP4
CAV3
CBLL1
CBLN2
CBLN3
CBWD2
CCDC103
CCDC122
CCDC124
CCDC127
CCDC149
CCDC152
CCDC153
CCDC160
CCDC167
CCDC43
CCDC51
CCDC59
CCDC71L
CCDC85B
CCDC86
CCK
CCL15
CCL25
CCL28
CCL4
CCR3
CCS
CD164L2
CD2BP2
CD302
CD320
CDC14B
CDC25A
CDC42EP2
CDC42SE2
CDCP2
CDIPT
CDK5R1
CDKL2
CDPF1
CDR2L
CDRT1
CDSN
CEACAM19
CEBPE
CELA3A
CENPH
CENPP
CENPQ
CEP55
CEP57L1
CEPT1
CERS4
CES2
CES4A
CFAP126
CFD
CGB5
CGB8
CGREF1
CH25H
CHAC1
CHAD
CHCHD10
CHMP1A
CHMP2A
CHMP4A
CHMP4C
CHMP5
CHMP6
CHRDL2
CHRFAM7A
CHST13
CHST4
CIB2
CIB3
CIDEC
CILP2
CIPC
CISD1
CISH
CKM
CLCF1
CLDN14
CLDN20
CLDND2
CLEC11A
CLEC2B
CLEC3A
CLECL1
CLN5
CLN6
CLPB
CLPS
CLPSL2
CLTA
CMA1
CMC1
CMTM4
CMTM8
CNEP1R1
CNN2
CNOT7
CNPY4
CNR2
CNTD1
CNTD2
CNTF
COL8A2
COLEC11
COLGALT1
COMMD3
COMMD6
COPE
COPS4
COPS6
COPS7A
COPZ2
COQ10A
COQ10B
COQ2
COQ4
COQ7
CORO1B
COX11
COX17
COX4I2
COX5A
COX5B
CPA3
CPLX3
CPO
CPOX
CRB2
CRBN
CREG1
CRH
CRIP1
CRIP2
CRIP3
CRIPT
CRISP3
CRLF1
CRYBB3
CRYGA
CRYGB
CSAG2
CSDC2
CSF2
CSNK1G1
CSRP2
CSRP3
CST11
CST2
CST7
CT55
CT83
CTAG2
CTBS
CTNNBIP1
CTRL
CTSW
CUEDC1
CUEDC2
CX3CL1
CXCL11
CXCL13
CXCL16
CXCL9
CXXC1
CYB561
CYB561A3
CYB5D2
CYP2R1
CYS1
CYSTM1
DACT3
DAOA
DAP
DBF4
DBI
DCLRE1A
DCTPP1
DDO
DDTL
DDX19A
DEC1
DECR1
DEDD
DEDD2
DEF8
DEFA3
DEFA4
DEFB114
DEFB121
DEFB123
DEFB127
DEFB128
DEFB132
DEFB4A
DENND6B
DERL3
DES
DHDH
DHH
DHRS3
DHRS9
DIMT1
DIRC1
DLGAP3
DLK2
DLX1
DLX3
DMRT1
DMRTA2
DMTF1
DMTN
DNAH10OS
DNAJB12
DNAJC17
DNAJC25
DNAJC30
DNAJC4
DNAJC5
DNAJC8
DNASE2
DNASE2B
DOC2B
DOK4
DOK6
DPEP2
DPF1
DPH7
DPM2
DPM3
DPP7
DPPA5
DPRX
DRAP1
DRAXIN
DUOXA2
DUSP23
DUSP4
DYNAP
DYNC1I2
DYNLRB1
E2F4
E2F5
EBPL
EEF2KMT
EFCAB10
EFCAB2
EFHD1
EGLN2
EHF
EIF1
EIF3CL
EIF4E3
ELANE
ELMO3
ELMOD2
ELOF1
EMC10
EMC8
EMX1
EN2
ENHO
ENKD1
ENTPD8
EPDR1
EPGN
EPPIN-WFDC6
EPS8L2
EQTN
ERCC8
ERICH2
ERICH5
ERMN
ERVH48-1
ESRRA
ETFA
ETHE1
EVA1A
EVI2A
EVX1
EVX2
EXOC3L1
EXOC3L4
EXOSC10
EXOSC4
EXTL2
F12
FA2H
FABP4
FABP7
FADS3
FAHD1
FAM106A
FAM120AOS
FAM120B
FAM163B
FAM167B
FAM168A
FAM168B
FAM174B
FAM181A
FAM204A
FAM207A
FAM216A
FAM227A
FAM228B
FAM229B
FAM24B
FAM25A
FAM32A
FAM3A
FAM3D
FAM43A
FAM43B
FAM47E-STBD1
FAM57B
FAM71C
FAM72C
FAM83H
FAM86B1
FAM86B2
FAM89A
FAM8A1
FAXC
FBLIM1
FBLL1
FBP2
FBXL12
FBXL8
FBXO36
FBXO39
FBXO6
FBXO8
FBXO9
FCF1
FCN3
FDCSP
FDXACB1
FDXR
FEM1C
FEZF1
FFAR2
FGF14
FGF16
FGF17
FGF20
FGF3
FGF9
FGFBP2
FGFBP3
FGL1
FIS1
FITM1
FIZ1
FJX1
FKBP1B
FKBP7
FKRP
FLT3LG
FLVCR2
FN3K
FNDC4
FNDC9
FOLR3
FOXD4L6
FOXI1
FOXI2
FOXP4
FRA10AC1
FREM3
FRG2
FRG2B
FRMD8
FRRS1L
FUOM
FUT4
FUT7
FXN
FXYD1
FXYD4
FXYD6-FXYD2
FZD8
GABARAPL2
GABRP
GAGE1
GAGE10
GALK1
GALM
GALNT4
GALP
GALR2
GAMT
GATAD1
GATC
GBX2
GCKR
GCLM
GCNT7
GCSAM
GDF11
GEM
GFI1B
GGCX
GGT7
GHRH
GID4
GINM1
GINS1
GINS2
GIPC2
GJB7
GJD3
GLDN
GLI4
GLOD5
GLRX5
GLYATL2
GMCL1
GNAL
GNG10
GNG11
GNG4
GNMT
GNPDA1
GNRHR
GOLGA6B
GOLGA7
GOLGA7B
GOLGA8A
GOLGA8B
GOLGA8G
GOLGA8Q
GORASP2
GOSR2
GOT1L1
GPANK1
GPBAR1
GPBP1
GPC1
GPC4
GPHA2
GPHB5
GPR119
GPR135
GPR137
GPR150
GPR171
GPR27
GPR31
GPR45
GPR52
GPR62
GPR82
GPX7
GREM1
GRIFIN
GRK5
GRPEL1
GRPEL2
GSC2
GSG1
GSG1L
GSKIP
GSTA3
GSTA4
GSTZ1
GTF2A1L
GTF2B
GTF2F2
GTF2H5
GTF3A
GTPBP1
GTPBP8
GUK1
GYPA
GYPC
GZMM
H1F0
H2AFB1
H2AFJ
HARBI1
HAUS1
HAUS3
HBA2
HBD
HBG2
HCST
HDDC3
HDGFL1
HECA
HENMT1
HERPUD2
HES4
HEXB
HEXIM1
HEY2
HGH1
HHLA3
HIF1AN
HIGD2B
HINT2
HINT3
HIST1H2BA
HIST1H2BL
HIST1H2BM
HIST1H3J
HIST1H4C
HIST1H4F
HIST1H4G
HIST3H2A
HLA-DPA1
HLA-DQA1
HLA-DQB1
HLA-DRA
HMCN2
HMGN1
HMGXB4
HMOX2
HMSD
HNRNPA1L2
HOGA1
HOMER3
HOXA2
HOXA4
HOXB4
HOXB8
HOXC12
HOXD1
HOXD4
HPCA
HPDL
HPR
HR
HRASLS5
HS3ST1
HS3ST6
HSBP1
HSBP1L1
HSCB
HSD17B13
HSF4
HSFX2
HSPB9
HTN3
HTR2B
HYKK
IAH1
IAPP
ICAM2
ICMT
ICOSLG
IDUA
IER3
IFFO2
IFI44L
IFIT1B
IFITM10
IFITM2
IFITM5
IFNA6
IFNGR2
IFNL2
IFNLR1
IFNW1
IFT20
IFT57
IGFALS
IGFBP6
IGFBPL1
IGFL4
IGFLR1
IGIP
IGLL1
IL1F10
IL20
IL20RB
IL26
IL27
IL3
IL36G
INA
ING2
INHBE
INIP
INO80B
INO80E
INPP5K
INSIG1
INS-IGF2
INSL4
IQCF3
IQCF5
IQCJ
ISCU
ISL2
ISOC1
IST1
ISY1-RAB43
ITPKA
IZUMO2
JAM2
JKAMP
JMJD7
JTB
JUNB
KBTBD13
KCNE2
KCNG2
KCNG3
KCNJ4
KCNK17
KCNK6
KCNK7
KCNMB4
KCNS1
KCTD11
KCTD15
KCTD17
KCTD4
KCTD5
KCTD7
KDELR2
KDF1
KHDC1
KHNYN
KIAA0895L
KIAA2012
KLF1
KLHDC8A
KLHL33
KLHL35
KLHL42
KLLN
KLRB1
KLRC2
KLRG1
KNOP1
KRCC1
KRT16
KRT37
KRTAP10-12
KRTAP10-3
KRTAP11-1
KRTAP13-1
KRTAP17-1
KRTAP19-4
KRTAP19-6
KRTAP19-8
KRTAP20-1
KRTAP20-4
KRTAP21-1
KRTAP21-2
KRTAP23-1
KRTAP25-1
KRTAP26-1
KRTAP27-1
KRTAP4-11
KRTAP4-12
KRTAP4-2
KRTAP5-1
KRTAP5-4
KRTAP8-1
KRTAP9-4
KRTAP9-8
KRTDAP
L3HYPDH
LAIR1
LALBA
LAMP1
LAMTOR2
LAMTOR5
LAT2
LBH
LBX1
LBX2
LCE1F
LCE3A
LCE3B
LCE6A
LCLAT1
LCMT1
LCN10
LCORL
LDHD
LDLRAD3
LDLRAP1
LEAP2
LEMD1
LGALS13
LGALS7
LGALS7B
LGALS9C
LGMN
LHFPL1
LHFPL3
LIN7C
LIPI
LIPJ
LIX1L
LLPH
LMF2
LMNB1
LNP1
LRFN1
LRP10
LRP11
LRP3
LRRC10
LRRC10B
LRRC14
LRRC20
LRRC24
LRRC25
LRRC3
LRRC37A
LRRC38
LRRC39
LRRC58
LRRC63
LRRC69
LRRC74B
LRRC75B
LSM1
LSM10
LSM6
LSM7
LST1
LTA
LTBP3
LTBR
LTC4S
LUC7L2
LY6D
LY6H
LYG1
LYPD6B
LYPLA1
LYPLAL1
LYRM1
LYRM7
LYSMD2
LYZL1
LZIC
MAD2L1BP
MAD2L2
MAFG
MAGEF1
MAK16
MAL2
MALSU1
MAN1C1
MANEA
MANEAL
MANF
MANSC4
MAP3K14
MAP7D1
MARCH4
MARS2
MATN1
MATN3
MBL2
MBOAT2
MC5R
MCEMP1
MCM5
MCM8
MED11
MED26
MED31
MEIG1
MEIOB
MEOX1
MESP2
METRN
METTL1
METTL15
METTL21A
METTL6
MFAP3
MFGE8
MFSD10
MFSD2A
MFSD2B
MFSD6L
MGARP
MGAT2
MGLL
MGST3
MIDN
MIIP
MIP
MITD1
MLKL
MLN
MLNR
MLST8
MOB2
MOB3C
MOG
MOGAT2
MON1A
MPPE1
MPPED1
MPST
MPV17
MPV17L2
MPZL2
MRM1
MROH6
MRPL10
MRPL14
MRPL22
MRPL27
MRPL30
MRPL33
MRPL39
MRPL42
MRPL47
MRPS16
MRPS23
MRPS28
MRPS30
MRPS34
MRPS7
MRRF
MS4A12
MS4A13
MS4A4E
MS4A6E
MSC
MSMO1
MSMP
MSRB1
MSS51
MT1A
MT1B
MT1E
MT1G
MT1X
MT4
MTFR2
MTHFD2
MTIF3
MTRF1L
MUC19
MVK
MXD3
MXD4
MXRA7
MYADM
MYL4
MYL5
MYL7
MYL9
MYLPF
MYOZ2
MYOZ3
MYPOP
MYRFL
MZT2A
MZT2B
N4BP2L1
N6AMT1
NAA40
NAB1
NABP2
NAGPA
NANOS2
NANP
NAPSA
NAT16
NBPF15
NBPF7
NBPF8
NCALD
NCLN
NCS1
NDEL1
NDUFA10
NDUFA11
NDUFA3
NDUFA4L2
NDUFAF2
NDUFAF3
NDUFAF4
NDUFB10
NDUFB11
NDUFB3
NDUFB4
NDUFC2
NECAP2
NEDD8
NEK7
NELFB
NEU2
NEURL1
NEUROD2
NFYA
NGB
NHLRC3
NIFK
NINJ1
NIP7
NIPSNAP1
NKAIN1
NKPD1
NLGN4Y
NLRP6
NME4
NMRK1
NNAT
NNMT
NOL7
NOLC1
NOMO3
NOP10
NOXRED1
NPBWR2
NPFF
NPFFR1
NPIPA1
NPIPA8
NPL
NPM2
NPY
NPY4R
NR2F6
NR5A1
NRBF2
NRGN
NRL
NRN1L
NT5C1A
NTAN1
NTF4
NTN3
NTS
NUBP1
NUDC
NUDCD3
NUDT1
NUDT12
NUDT15
NUDT2
NUDT4
NUDT9
NUMBL
NXNL2
NXT2
OAS1
OAT
OAZ2
OAZ3
OCEL1
OCIAD2
OCM2
ODF1
ODF3L1
OGFR
OIP5
OMG
ONECUT3
OR10D3
OR10G3
OR10H3
OR11H1
OR13C3
OR14J1
OR14K1
OR1B1
OR1D4
OR1G1
OR1J4
OR1K1
OR1N2
OR2A25
OR2A4
OR2A5
OR2AE1
OR2C1
OR2F2
OR2H2
OR2S2
OR2T5
OR2V1
OR2V2
OR3A3
OR4F5
OR4K13
OR51B2
OR51G1
OR51L1
OR51M1
OR51S1
OR51T1
OR52B6
OR52E2
OR52L1
OR5B2
OR5B21
OR5K4
OR5M10
OR5M8
OR5M9
OR5P3
OR6C4
OR6C68
OR8B3
OR8B8
OR9K2
OR9Q2
ORMDL2
ORMDL3
OSGEP
OSTN
OTOR
OTUB2
OVCA2
OVOL2
OXCT2
OXNAD1
OXTR
P2RX6
P2RY11
P2RY12
P2RY14
PABPC1L2A
PABPN1
PACRGL
PAK1IP1
PALM
PANX1
PANX2
PAOX
PAQR8
PARL
PARM1
PARN
PATE2
PATE3
PAWR
PBLD
PCBD2
PCBP4
PCDH20
PCDH8
PCED1A
PCGF2
PCGF3
PCNP
PCP4
PDIA6
PDK2
PDLIM2
PDXP
PDZD11
PDZD9
PELI1
PELO
PEMT
PEX10
PEX11A
PEX11G
PEX14
PFDN4
PGA3
PGAM2
PGAM5
PGAP3
PGC
PGP
PHAX
PHC1
PHF1
PHF10
PHF5A
PHKG2
PHOSPHO1
PHPT1
PIDD1
PIF1
PIFO
PIGC
PIGH
PIGK
PIGM
PIGP
PIGX
PIGY
PILRA
PIP5KL1
PIRT
PKIB
PKMYT1
PLA2G12A
PLA2G2D
PLA2G2E
PLA2G2F
PLAC9
PLAGL2
PLEKHB1
PLEKHD1
PLEKHG4
PLEKHJ1
PLEKHO2
PLK5
PLP1
PLSCR1
PMAIP1
PMM1
PNMA1
PNMA6A
PNPLA2
PNPLA3
PNPLA5
POC1A
POLE4
POLR1E
POLR2D
POLR2E
POLR2I
POLR2M
POLR3G
POLR3K
POMT1
PON2
POP4
POU4F3
PPA2
PPBP
PPCDC
PPIAL4A
PPIAL4C
PPIAL4F
PPIB
PPIC
PPIE
PPIF
PPIH
PPIL1
PPIL6
PPP1R14C
PPP1R18
PPP1R27
PPP1R37
PPP2R2D
PPP4R1
PPP5D1
PQLC3
PRAC1
PRAC2
PRADC1
PRAMEF5
PRAMEF7
PRAMEF8
PRDM12
PRELID1
PRELID2
PRG2
PRM1
PRM3
PROK1
PROK2
PRPH
PRPSAP1
PRR21
PRR22
PRR25
PRR29
PRR30
PRR5
PRR7
PRRC1
PRRG3
PRSS22
PRSS23
PRSS50
PSKH1
PSMB3
PSMB5
PSMC1
PSMD7
PSMD8
PSMD9
PSMG4
PSORS1C1
PSPH
PSRC1
PSTPIP2
PTF1A
PTGDR2
PTGES3L
PTGIR
PTH
PTOV1
PTRHD1
PTS
PTTG1IP
PTX4
PUSL1
PWP2
PXT1
PYCR1
PYDC2
QRFP
R3HDM4
RAB15
RAB17
RAB20
RAB26
RAB27A
RAB2A
RAB31
RAB33A
RAB39A
RAB5C
RAB7A
RABAC1
RABIF
RAD1
RAD23A
RAD52
RAET1E
RANBP1
RAP2A
RAP2C
RASD1
RASL10B
RASSF3
RAX
RAX2
RBM3
RBM43
RBMS2
RBP2
RCCD1
RCE1
RCSD1
RDH13
RDH14
RDM1
REC114
REEP3
REEP4
RELL2
REP15
RER1
RERGL
REXO4
RFC5
RFK
RFPL4AL1
RFT1
RGCC
RGPD1
RGPD8
RGS11
RHBDD3
RHBDF1
RHBDL1
RHBDL3
RHCE
RHOD
RHOXF2B
RIBC2
RILPL2
RIMS4
RING1
RINL
RIPPLY2
RIPPLY3
RNASE10
RNASE12
RNASE4
RNASE6
RNASE8
RNASEH1
RNASEH2C
RNASEK
RND2
RNF11
RNF121
RNF126
RNF152
RNF165
RNF181
RNF183
RNF185
RNF216
RNF222
RNF25
ROMO1
RORA
RPA1
RPAIN
RPE
RPF1
RPH3AL
RPIA
RPL11
RPL14
RPL15
RPL17-C18orf32
RPL24
RPL31
RPL35A
RPL37
RPL7A
RPL7L1
RPLP2
RPP14
RPRD1A
RPS10-NUDT3
RPS14
RPS17
RPS18
RPS25
RPUSD1
RRH
RRP36
RRP9
RSC1A1
RSPH1
RSPH10B2
RSPH3
RSPH9
RSPO1
RSPO4
RTCA
RTN4R
RTN4RL1
RTP1
RTP2
RTP3
RTP4
RUNDC3A
RWDD2B
RXRB
RYK
S100A12
S100A3
S100A5
S1PR5
SAA2-SAA4
SAAL1
SAC3D1
SAMD1
SAPCD2
SAR1A
SARAF
SARNP
SASH3
SBK2
SCAMP5
SCAND1
SCGB1A1
SCGB1D2
SCIMP
SCNM1
SCO2
SCOC
SCP2D1
SCRT2
SCX
SDF2
SDHAF3
SDHAF4
SEBOX
SEC61B
SEC61G
SEMA3B
SEMA7A
SENP8
SERGEF
SERP1
SERPINB10
SERPINB2
SERTAD1
SERTM1
SETD6
SF3A2
SFRP5
SFXN1
SH2D1B
SH3BP2
SH3RF3
SHB
SHBG
SHF
SHISA2
SHISA3
SHISA5
SIGLEC16
SIGMAR1
SIKE1
SIRT5
SIX3
SKP1
SLC13A5
SLC14A1
SLC15A3
SLC16A13
SLC16A3
SLC16A8
SLC17A1
SLC22A13
SLC25A22
SLC25A24
SLC25A26
SLC25A28
SLC25A33
SLC25A34
SLC25A35
SLC25A40
SLC25A45
SLC25A46
SLC25A51
SLC26A1
SLC2A5
SLC30A6
SLC35A3
SLC35A4
SLC35D2
SLC35E2B
SLC35E3
SLC35F2
SLC35G4
SLC35G5
SLC35G6
SLC36A4
SLC38A6
SLC39A1
SLC39A2
SLC39A3
SLC39A8
SLC41A2
SLC44A4
SLC50A1
SLC52A1
SMAD5
SMCO2
SMCO3
SMDT1
SMIM10L1
SMIM13
SMIM15
SMIM20
SMOC1
SMOX
SMPDL3B
SNAPC2
SNAPC5
SNAPIN
SNCA
SNRNP25
SNRNP27
SNRPA1
SNRPB2
SNRPD1
SNRPD3
SNRPE
SNTB2
SNURF
SNX11
SNX20
SNX21
SOWAHB
SOX15
SP5
SP8
SPA17
SPACA4
SPAG8
SPANXN1
SPANXN4
SPATA20
SPATA22
SPATA31E1
SPATA45
SPCS2
SPCS3
SPESP1
SPIN3
SPINK14
SPIRE1
SPRR2G
SPRY4
SPSB2
SPSB3
SPTSSA
SPTSSB
SPX
SREK1IP1
SRP14
SRP54
SRP9
SRRM3
SRSF12
SRSF5
SRSF6
SSBP1
SSPN
SSR2
SST
SSTR1
SSU72
SSX4B
SSX5
ST20
ST6GALNAC5
STARD3NL
STH
STMND1
STOM
STPG1
STRA8
STX12
STX16
STX8
SUCLG1
SULT4A1
SUMF1
SUN3
SUPT4H1
SUSD3
SUSD6
SVIP
SWSAP1
SYF2
SYNDIG1
SYNDIG1L
SYNGR1
SYNJ2BP
TAAR1
TAF12
TAF1D
TAF7
TAF8
TANGO2
TARDBP
TAS2R20
TAS2R30
TAS2R38
TAS2R7
TAX1BP3
TBC1D10A
TBC1D14
TBC1D26
TBC1D30
TBCA
TBPL1
TCAF1
TCAP
TCEA2
TCEAL4
TCP10
TCP10L2
TCTA
TDRP
TECR
TEF
TEKT4
TERF2
TEX19
TEX22
TEX29
TGDS
TGFB1I1
TH
THAP11
THAP4
THAP7
THEM4
THOC7
THYN1
TIFAB
TIGD1
TIGD5
TIGD7
TIMD4
TIMM10
TIMM10B
TIMM13
TIMM9
TINF2
TLCD1
TLDC2
TM2D2
TM4SF19
TM6SF1
TMCO2
TMCO5A
TMED3
TMED6
TMED7-TICAM2
TMEM106C
TMEM109
TMEM11
TMEM116
TMEM125
TMEM126A
TMEM134
TMEM144
TMEM151A
TMEM156
TMEM160
TMEM174
TMEM176A
TMEM179B
TMEM183A
TMEM184C
TMEM186
TMEM189
TMEM191B
TMEM191C
TMEM200B
TMEM202
TMEM205
TMEM218
TMEM232
TMEM237
TMEM241
TMEM251
TMEM253
TMEM254
TMEM255B
TMEM258
TMEM30B
TMEM45A
TMEM45B
TMEM52
TMEM52B
TMEM54
TMEM60
TMEM86A
TMEM89
TMEM8A
TMEM92
TMEM95
TMEM9B
TMLHE
TMSB10
TMX2
TNFAIP8L1
TNFAIP8L3
TNFRSF10C
TNK1
TNNI3K
TOLLIP
TOMM20L
TOMM22
TOMM5
TOMM7
TP53AIP1
TP53I13
TP53INP2
TP53RK
TPD52L1
TPPP3
TPRG1L
TPSG1
TPST2
TPT1
TRABD
TRAIP
TRAPPC6A
TRAPPC6B
TREX1
TRH
TRIB3
TRIM11
TRIM15
TRIM3
TRIM35
TRIM4
TRIM49B
TRIM54
TRIM63
TRIM8
TRIML2
TRIP6
TRMT44
TRNP1
TSACC
TSHB
TSN
TSPAN10
TSPAN13
TSPAN18
TSPAN3
TSPAN31
TSPAN4
TSPAN5
TSPYL6
TSR3
TSSK4
TSTD1
[truncated: 158 more rows]

## Sheet: Table S6
EARN: an ensemble machine learning algorithm to predict driver genes in metastatic breast cancer
Leila Mirsadeghi1, Reza Haji Hosseini1*, Ali Mohammad Banaei-Moghaddam2, Kaveh Kavousi3*
* Correspondence: kkavousi@ut.ac.ir; hosseini@pnu.ac.ir;
1Department of Biology, Faculty of Science, Payame Noor University, Tehran, Iran
2 Laboratory of Genomics and Epigenomics (LGE), Department of Biochemistry, Institute of Biochemistry and Biophysics (IBB), University of Tehran, Tehran, Iran
3 Laboratory of Complex Biological Systems and Bioinformatics (CBB), Department of Bioinformatics, Institute of Biochemistry and Biophysics (IBB), University of Tehran, Tehran, Iran
Additional file 4: Table S6 37 genes as positive training data for MBCA
AKT1
AKT2
AKT3
BRCA1
BRCA2
CBL
CDH1
CDKN1B
CDKN2A
DDR2
EGFR
ERBB2
ERBB4
ESR1
FGFR1
FOXO3
GATA3
IGF1R
MAP2K4
MYB
NCOA3
NOTCH1
NOTCH3
NTRK1
NTRK3
PIK3CA
PREX2
PTEN
RB1
RET
RHOA
SMAD4
STK11
TGFBR2
TP53
ZFHX3
ZNF217

## Sheet: Table S7
EARN: an ensemble machine learning algorithm to predict driver genes in metastatic breast cancer
Leila Mirsadeghi1, Reza Haji Hosseini1*, Ali Mohammad Banaei-Moghaddam2, Kaveh Kavousi3*
* Correspondence: kkavousi@ut.ac.ir; hosseini@pnu.ac.ir;
1Department of Biology, Faculty of Science, Payame Noor University, Tehran, Iran
2 Laboratory of Genomics and Epigenomics (LGE), Department of Biochemistry, Institute of Biochemistry and Biophysics (IBB), University of Tehran, Tehran, Iran
3 Laboratory of Complex Biological Systems and Bioinformatics (CBB), Department of Bioinformatics, Institute of Biochemistry and Biophysics (IBB), University of Tehran, Tehran, Iran
Additional file 4: Table S7 3473 genes as negative training data for MBCA
A3GALT2
AACS
AADAT
AAMDC
AAR2
ABHD13
ABHD14A
ABHD14A-ACY1
ABHD17A
ABHD17B
ABHD17C
ABHD3
ABHD5
ABT1
ACAA2
ACAD8
ACAD9
ACADM
ACBD7
ACER1
ACOT12
ACOX2
ACP1
ACP6
ACSF3
ACSM2B
ACSM3
ACSM4
ACSS2
ACTL10
ACTN1
ACTR1A
ACTR3B
ACTRT2
ACVRL1
ACY1
ADAL
ADAM18
ADAM33
ADAMTS8
ADAP1
ADAT1
ADH6
ADI1
ADIPOR2
ADM5
ADORA3
ADPGK
ADRB3
ADSSL1
ADTRP
AES
AGA
AGAP3
AGAP6
AGMAT
AGO3
AGPAT3
AGPAT4
AGRP
AHSA1
AICDA
AIFM2
AIG1
AIMP1
AIMP2
AK3
AK4
AK5
AKAP14
AKAP2
AKIRIN1
AKR1B1
AKR1C4
AKR7A2
AKR7A3
AKT1S1
ALAS1
ALAS2
ALDH16A1
ALDH1A2
ALDH3A2
ALDH3B1
ALDH3B2
ALDOC
ALG14
ALG3
ALKBH1
ALKBH4
ALKBH8
AMDHD2
AMELX
AMER2
AMIGO1
AMN1
AMY1A
ANAPC1
ANAPC10
ANAPC16
ANGPTL3
ANGPTL5
ANKFN1
ANKLE1
ANKMY2
ANKRA2
ANKRD1
ANKRD13A
ANKRD13C
ANKRD13D
ANKRD2
ANKRD23
ANKRD30BL
ANKRD33
ANKRD33B
ANKRD34A
ANKRD36C
ANKRD42
ANKRD53
ANP32E
ANXA13
ANXA5
ANXA6
AP1AR
AP2S1
AP3M1
AP3S1
AP4B1
AP4S1
AP5S1
APBA3
APBB3
APCDD1L
APLN
APOA2
APOBEC3D
APOBEC4
APOL1
APOL3
APOLD1
APOOL
AQP10
AQP4
ARF3
ARFGAP3
ARG2
ARHGAP15
ARHGAP24
ARHGAP8
ARHGEF15
ARHGEF16
ARHGEF4
ARL16
ARL6IP4
ARMC1
ARMC7
ARMCX3
ARMCX5
ARPC3
ARPC4-TTLL3
ARPP19
ARR3
ARRB2
ART1
ART3
ARV1
ASAH1
ASAH2
ASB1
ASB13
ASB14
ASB16
ASB17
ASB18
ASB4
ASB6
ASCC2
ASCL3
ASCL4
ASGR1
ASIC1
ASIC4
ASIP
ASMTL
ASNSD1
ASPA
ASTL
ASZ1
ATAD1
ATAD3B
ATAT1
ATE1
ATG101
ATG14
ATG3
ATG9B
ATOH1
ATP1B1
ATP6V0D1
ATP6V1A
ATP6V1G1
ATP6V1H
ATP9A
ATRAID
ATRIP
ATRN
ATXN2
AUNIP
AUP1
AVL9
AVP
AVPR2
AZI2
B3GALT2
B3GALT5
B3GALT6
B3GAT2
B3GNT4
B3GNT9
B4GALT6
BAAT
BACE1
BAG5
BAHD1
BANP
BATF2
BATF3
BBIP1
BBS10
BCAS2
BCDIN3D
BCKDHB
BCL2A1
BCL6B
BCO2
BEND4
BEND6
BEST1
BEX2
BHLHA9
BHLHB9
BIN2
BLOC1S1
BLOC1S5
BLVRA
BLVRB
BLZF1
BNIP1
BNIP3L
BNIPL
BOD1L2
BPI
BPIFA1
BPIFA2
BPIFA3
BPIFB4
BRF1
BRSK2
BSX
BTBD10
BTBD16
BTBD2
BTC
BTF3L4
BTG3
BTNL2
BUD13
BUD31
C10orf126
C10orf55
C10orf82
C10orf99
C11orf1
C11orf21
C11orf40
C11orf49
C11orf53
C11orf58
C11orf68
C11orf71
C11orf74
C11orf87
C11orf88
C11orf96
C12orf42
C12orf60
C14orf177
C14orf39
C16orf45
C16orf47
C16orf54
C16orf58
C16orf70
C16orf74
C16orf90
C17orf100
C17orf47
C17orf49
C17orf50
C17orf53
C17orf64
C17orf67
C17orf80
C17orf97
C17orf98
C17orf99
C19orf12
C19orf18
C19orf48
C19orf53
C19orf54
C19orf57
C19orf66
C19orf71
C1GALT1C1
C1orf105
C1orf109
C1orf158
C1orf162
C1orf185
C1orf189
C1orf216
C1orf226
C1orf229
C1orf43
C1orf56
C1orf68
C1orf74
C1QB
C1QC
C1QTNF1
C1QTNF7
C1S
C20orf197
C20orf96
C22orf39
C2CD2
C2CD4D
C2orf83
C3AR1
C3orf20
C3orf56
C3orf62
C4A
C4B
C4orf17
C4orf19
C4orf47
C5AR1
C5orf22
C5orf30
C5orf38
C5orf51
C5orf52
C5orf58
C5orf66
C6orf132
C6orf15
C6orf163
C6orf47
C6orf58
C7orf50
C7orf57
C7orf61
C7orf71
C8G
C8orf44-SGK3
C9orf47
C9orf50
C9orf57
C9orf62
C9orf72
CA10
CA12
CA3
CA5A
CA5B
CA7
CAB39L
CABS1
CABYR
CACNA2D2
CACNB3
CACNG1
CACNG2
CACNG5
CADM3
CALCOCO2
CALM1
CALM3
CALR3
CAMK2D
CAMK4
CAMTA2
CAPN13
CAPN5
CAPSL
CAPZA1
CARD8
CARHSP1
CARM1
CASC3
CASP4
CASP7
CATIP
CBLN1
CBR4
CBWD1
CBX1
CBX2
CBX3
CBY3
CC2D1B
CCBE1
CCDC110
CCDC113
CCDC116
CCDC12
CCDC124
CCDC13
CCDC137
CCDC14
CCDC140
CCDC167
CCDC169
CCDC169-SOHLH2
CCDC175
CCDC183
CCDC30
CCDC33
CCDC34
CCDC42
CCDC43
CCDC60
CCDC68
CCDC74B
CCDC78
CCDC86
CCDC89
CCDC9
CCDC91
CCER2
CCL16
CCL20
CCL4
CCM2L
CCNE2
CCNI2
CCNJ
CCNK
CCNL2
CCNYL1
CCS
CCSAP
CCSER2
CCT3
CCT5
CCT7
CCZ1
CD160
CD164L2
CD200R1
CD247
CD2BP2
CD300C
CD300LD
CD300LF
CD68
CD8A
CDADC1
CDC16
CDC20
CDC34
CDC37
CDC42EP1
CDC42EP2
CDC7
CDCP2
CDH16
CDIP1
CDIPT
CDK10
CDK11A
CDK16
CDK17
CDK2
CDK20
CDK2AP2
CDK3
CDK5R1
CDK7
CDKL2
CDR2L
CDRT4
CDSN
CEACAM4
CEBPG
CELA2B
CELA3B
CEND1
CENPH
CENPI
CENPP
CENPU
CEP162
CEP57
CEP57L1
CEP68
CEP72
CEP85
CERCAM
CERS4
CES1
CETP
CFD
CFHR1
CFI
CFL2
CFLAR
CGGBP1
CGREF1
CHAC2
CHCHD1
CHCHD2
CHDH
CHIA
CHKA
CHMP1A
CHMP4A
CHMP4C
CHP1
CHP2
CHRFAM7A
CHRNB1
CHRNG
CHST6
CHSY1
CHTOP
CIAO1
CIB4
CIDEA
CISH
CITED4
CKB
CKS2
CLC
CLCNKB
CLDN15
CLDN19
CLDN2
CLDN25
CLDN8
CLEC12B
CLEC2D
CLEC2L
CLEC4A
CLEC4D
CLEC4F
CLEC5A
CLMP
CLN3
CLNK
CLNS1A
CLPTM1
CLRN1
CLTA
CLYBL
CMA1
CMAS
CMIP
CMTM2
CMTM4
CMTM8
CNBD2
CNDP2
CNIH3
CNN3
CNNM4
CNOT11
CNOT2
CNP
CNPPD1
CNPY2
CNRIP1
CNTD1
CNTFR
COA1
COA4
COCH
COL10A1
COL4A3BP
COL8A2
COMMD1
COMMD3-BMI1
COMMD4
COMMD7
COPS4
COPS5
COPZ2
COQ2
COQ6
COQ9
CORO1B
CORO2A
CORO6
COTL1
COX10
COX15
COX19
COX6A1
COX6B1
COX6B2
COX7A2
COX8A
COX8C
CPA3
CPLX3
CPNE2
CPNE6
CPO
CPOX
CPSF4
CR2
CRACR2A
CRAT
CRCT1
CRELD2
CRHBP
CRHR2
CRIP1
CRIPT
CRISP1
CRISP3
CRISPLD2
CRLF3
CRLS1
CRY1
CRYAA
CRYBB2
CRYBB3
CRYGC
CRYGD
CRYZ
CRYZL1
CSF2
CSF3
CSHL1
CSN2
CSNK1G2
CSNK2A3
CST9L
CSTF2
CSTF2T
CTAGE6
CTAGE9
CTBS
CTDSP1
CTDSP2
CTDSPL
CTNNBIP1
CTNNBL1
CTSC
CTSF
CTSV
CTXN2
CUTA
CXCL11
CXCL5
CXCL9
CXorf21
CXorf65
CYB5RL
CYGB
CYP1A2
CYP20A1
CYP2C18
CYP2C19
CYP46A1
CYP4X1
CYP4Z1
CYP7A1
CYSRT1
CYTIP
DAD1
DAGLA
DAND5
DAZL
DBNDD2
DBP
DCAF11
DCAF15
DCAF17
DCAF5
DCAF7
DCDC2C
DCLK3
DCP1A
DCP2
DCPS
DCTPP1
DCUN1D2
DCUN1D4
DCX
DCXR
DDAH1
DDIAS
DDN
DDOST
DDRGK1
DDX19A
DDX19B
DDX21
DDX24
DDX28
DECR1
DEFA5
DEFA6
DEFB116
DEFB123
DEFB128
DENND2D
DENND6A
DEPDC1
DEPDC4
DESI1
DFFB
DHH
DHODH
DHRS3
DIO1
DIO2
DIRAS2
DIS3L
DLK2
DLX3
DLX5
DLX6
DMAP1
DMC1
DMRT2
DMRTA2
DMRTC2
DMTN
DNAJB12
DNAJB14
DNAJB7
DNAJB8
DNAJB9
DNAJC12
DNAJC14
DNAJC21
DNAJC28
DNAJC4
DNAJC5G
DNAJC8
DNAJC9
DNAL1
DNAL4
DOK4
DOK7
DOLPP1
DPAGT1
DPCD
DPEP2
DPF3
DPH1
DPH3
DPH6
DPP3
DPP7
DPPA4
DPYSL4
DR1
DRAM2
DRD4
DSTN
DTWD1
DUOXA2
DUPD1
DUSP13
DUSP15
DUSP19
DUSP23
DUT
DYDC2
DYNC2LI1
DYNLRB2
DYNLT3
DYRK2
DZIP1L
E2F2
E4F1
EAF1
EBF4
EBI3
EBLN1
EBP
ECD
ECH1
ECHDC2
EDN2
EEF1A2
EEF1B2
EEF1E1
EFCAB12
EFCAB14
EFCAB7
EFHC2
EFHD2
EGR4
EHD3
EHD4
EID1
EID2
EID2B
EID3
EIF2B3
EIF2D
EIF2S1
EIF3C
EIF3K
EIF4E1B
EIF4E3
EIF4H
ELANE
ELMO3
ELMOD2
ELOVL1
ELOVL3
ELOVL6
ELOVL7
ELP2
EMC3
EMC6
EMC8
EMC9
EMD
EMILIN3
EN1
EN2
ENDOG
ENGASE
ENO3
ENOSF1
ENSA
ENTPD2
ENTPD3
EPB41L5
EPHX3
EPM2A
EPN3
EPS8L3
ERAL1
ERCC8
ERGIC1
ERGIC2
ERGIC3
ERH
ERI2
ERICH4
ERICH5
ERLEC1
ERLIN1
ERMARD
ERV3-1
ERVV-1
ERVV-2
ESD
ESYT2
ETF1
ETFB
ETFDH
ETNPPL
ETV3L
EVA1A
EVPLL
EXD3
EXOC3L4
EXOSC1
EXOSC3
EXOSC6
EXOSC7
EXTL3
EYA3
F10
FAAH
FABP6
FADS3
FAF1
FAM102A
FAM102B
FAM107A
FAM110C
FAM120AOS
FAM122B
FAM131C
FAM13A
FAM151B
FAM155B
FAM161A
FAM163B
FAM167B
FAM170B
FAM171A2
FAM172A
FAM174B
FAM180B
FAM181A
FAM181B
FAM187A
FAM189B
FAM192A
FAM199X
FAM200A
FAM217A
FAM217B
FAM222B
FAM228B
FAM3A
FAM3C
FAM43B
FAM53A
FAM53C
FAM57A
FAM57B
FAM71F2
FAM78A
FAM81B
FAM83F
FAM84A
FAM86B1
FAM86C1
FAM90A1
FAM98A
FAM9A
FAM9B
FAN1
FANCL
FAR1
FASTKD3
FATE1
FBL
FBLIM1
FBP1
FBXL2
FBXL22
FBXL3
FBXL4
FBXO10
FBXO15
FBXO17
FBXO21
FBXO22
FBXO25
FBXO30
FBXO43
FBXO5
FBXW8
FCGR1B
FCHO2
FCN1
FCRL5
FCRLB
FDCSP
FDPS
FGB
FGD2
FGD4
FGF3
FGF6
FGF9
FGFBP2
FGGY
FHL5
FIBCD1
FIBIN
FICD
FIGNL1
FILIP1L
FITM2
FKBP1A
FKBP2
FLRT3
FLVCR2
FMO4
FMR1NB
FNDC4
FNDC8
FNDC9
FNTB
FOPNL
FOXB1
FOXE3
FOXN1
FPGS
FPGT
FPR3
FRAT2
FRG1
FRG2C
FRK
FRRS1
FRRS1L
FRS3
FTH1
FUCA1
FUT2
FUT7
FXYD1
FXYD2
FXYD6-FXYD2
FXYD7
FZD6
GABARAPL1
GABBR2
GABPB2
GABRD
GABRP
GABRR1
GAD2
GADD45G
GADL1
GALNS
GALNT1
GALNT15
GALNT4
GALR1
GALR3
GAMT
GANAB
GANC
GAP43
GAPT
GAS8
GATAD2A
GATC
GCC1
GCG
GCK
GDA
GDAP1
GDPD5
GDPGP1
GEMIN7
GEMIN8
GET4
GFI1
GFPT1
GFPT2
GGCX
GGN
GIMAP2
GIMAP8
GIMD1
GINM1
GINS1
GIPC3
GIPR
GIT2
GJA5
GJB5
GJC1
GLB1
GLIPR1
GLIPR1L1
GLIPR1L2
GLMN
GLOD4
GLOD5
GLP1R
GLRX2
GLRX5
GLT8D1
GLTP
GLUD2
GLYATL2
GMDS
GMEB1
GMFB
GMNC
GMPR
GMPR2
GNAO1
GNAZ
GNB1L
GNB2
GNB5
GNG11
GNG13
GNG3
GNG5
GNGT1
GNPDA2
GNPNAT1
GNRHR
GOLGA6C
GOLGA6L1
GORAB
GORASP2
GOSR2
GP1BA
GP1BB
GP9
GPA33
GPAT2
GPBP1
GPC2
GPCPD1
GPN2
GPN3
GPR135
GPR137C
GPR143
GPR146
GPR148
GPR160
GPR171
GPR173
GPR176
GPR20
GPR22
GPR26
GPR3
GPR31
GPR33
GPR34
GPR35
GPR52
GPR62
GPR63
GPR89A
GPRASP2
GPRC5C
GPX2
GPX6
GRAP
GREM2
GRIP2
GRM2
GRWD1
GSC2
GSDMD
GSG1L
GSPT1
GSR
GSS
GSTA1
GSTO1
GSTO2
GTDC1
GTF2A1
GTF2IRD2
GTF3A
GTF3C6
GTPBP10
GTPBP8
GUCA1C
GUCD1
GUF1
GUK1
GXYLT2
GYPA
GYPB
GZMA
GZMM
HAPLN1
HAPLN4
HARBI1
HAS3
HAUS1
HAUS6
HAUS7
HBB
HBE1
HCAR2
HCAR3
HCCS
HCFC1R1
HCRTR1
HCRTR2
HDDC3
HDGFL1
HDHD3
HEATR4
HEBP1
HECA
HENMT1
HERC3
HERC5
HERPUD2
HES5
HES7
HEXIM1
HEXIM2
HEYL
HHLA3
HIBADH
HIGD1A
HILPDA
HINT1
HIST1H1A
HIST1H2BA
HIST1H2BI
HIST1H4F
HIST1H4K
HIST1H4L
HIST4H4
HLA-C
HLA-DMA
HLA-DMB
HMGB3
HMGCLL1
HMGN5
HMOX2
HNMT
HNRNPA0
HNRNPA3
HNRNPCL1
HNRNPDL
HOGA1
HOMER2
HOMER3
HOMEZ
HOTS
HOXB2
HOXB3
HOXC12
HOXC4
HOXD1
HP1BP3
HPGDS
HPRT1
HPS4
HPX
HRASLS2
HRCT1
HRH1
HS1BP3
HS2ST1
HS3ST2
HS6ST1
HSD11B1
HSD11B2
HSD17B1
HSD17B10
HSD17B14
HSD3B1
HSD3B2
HSDL2
HSF2
HSF2BP
HSH2D
HSPA14
HSPA4L
HSPB6
HSPB7
HSPB9
HSPBP1
HTR2A
HTR3B
HTR3D
HUS1
HYPM
ICOS
ICOSLG
IDH3B
IDNK
IDS
IER2
IER5
IFI27L1
IFI27L2
IFI30
IFI35
IFI44
IFIT1B
IFITM3
IFITM5
IFNA13
IFNA6
IFNA8
IFNE
IFNGR1
IFNGR2
IFNL1
IFNW1
IFT46
IFT52
IGLL1
IKBIP
IKZF5
IL17D
IL18BP
IL20
IL27
IL2RA
IL31
IL33
IL36B
IL37
IL3RA
IL9
IL9R
ILKAP
ILVBL
IMPA2
IMPAD1
INCA1
INHBB
INHBE
INO80B
INPP5E
INPP5K
INSC
INSIG2
INS-IGF2
INSL3
INSL4
INSM2
INTS10
INTS3
IPP
IQCE
IQCF2
IQCK
IRAK1BP1
IRAK2
IRF2BPL
IRF9
ISCU
ISG20
ISG20L2
ISL1
ISLR
ITGB1BP2
ITIH4
ITM2A
ITPKC
ITPRIP
ITPRIPL2
IVD
IYD
JADE3
JAGN1
JAM2
JKAMP
JOSD2
JRKL
JTB
KANSL3
KATNAL1
KATNAL2
KBTBD12
KBTBD3
KCMF1
KCNA10
KCNA2
KCNA3
KCNAB2
KCNB1
KCND2
KCNH3
KCNIP2
KCNIP4
KCNJ14
KCNJ15
KCNJ16
KCNJ6
KCNJ8
KCNK1
KCNK15
KCNK16
KCNK6
KCNK7
KCNMB2
KCNRG
KCTD1
KCTD14
KCTD16
KCTD17
KCTD6
KDELR2
KDM4D
KDM4E
KHDC3L
KHDRBS3
KIAA0232
KIAA0753
KIAA0754
KIAA1107
KIAA1328
KIAA1958
KIF11
KIR3DL2
KIR3DL3
KLB
KLC1
KLHDC10
KLHDC8B
KLHL10
KLHL11
KLHL12
KLHL14
KLHL15
KLHL2
KLHL25
KLHL36
KLHL7
KLK1
KLK11
KLK14
KLRC2
KLRC3
KPNA5
KPNA7
KPTN
KRBA2
KRBOX1
KREMEN2
KRIT1
KRT10
KRT12
KRT26
KRT33B
KRT38
KRT40
KRT6C
KRT74
KRT79
KRT83
KRT84
KRT86
KRTAP10-1
KRTAP10-12
KRTAP10-2
KRTAP1-1
KRTAP11-1
KRTAP15-1
KRTAP17-1
KRTAP19-5
KRTAP19-6
KRTAP4-1
KRTAP4-4
KRTAP4-8
KRTAP5-1
KRTAP5-11
KRTAP5-2
KRTAP5-3
KRTAP5-6
KRTAP5-7
KRTAP6-3
KRTAP8-1
KRTAP9-3
KRTAP9-4
KRTAP9-8
KTI12
KXD1
KYNU
LACRT
LAGE3
LALBA
LAMP1
LAMP2
LAMTOR3
LAPTM4A
LAPTM5
LAT2
LCE1D
LCE1F
LCE3D
LCMT1
LCN1
LCN15
LCNL1
LCP2
LDB3
LDOC1
LECT2
LEFTY2
LEMD1
LENEP
LETMD1
LGALS4
LGALS7B
LGALS9B
LGALS9C
LGMN
LHB
LHFPL2
LHX1
LHX3
LHX5
LHX8
LIAS
LIG4
LILRA3
LIMD1
LIMS2
LIN7B
LIN7C
LIPA
LIPC
LIPE
LIPG
LIPJ
LIPK
LITAF
LIX1L
LMAN2
LMF2
LMO3
LMO4
LNP1
LNX2
LOC100129697
LOC100287036
LOC283710
LOC389602
LPAR3
LPCAT2
LPCAT4
LRAT
LRCH1
LRIT2
LRMP
LRP11
LRP2BP
LRR1
LRRC14
LRRC19
LRRC20
LRRC25
LRRC31
LRRC37A2
LRRC52
LRRC57
LRRC69
LRRC71
LRRC8D
LRRTM2
LSM11
LSM2
LSM4
LSM5
LUC7L
LXN
LY6D
LY6G6C
LY6G6F
LY6K
LYAR
LYG2
LYPD4
LYPD6
LYPD8
LYPLA1
LYRM4
LYSMD1
LYZL1
LYZL4
LZTFL1
M6PR
MAB21L1
MAD2L1BP
MAF1
MAFF
MAGEA11
MAGEA12
MAGEA4
MAGEB1
MAGEB16
MAGEB17
MAGEB4
MAGEB5
MAGEB6
MALSU1
MAN1C1
MAN2A1
MAN2C1
MANBAL
MANSC4
MAOB
MAP3K14
MAP3K7CL
MAP9
MAPK6
MAPKAPK3
MAPRE3
MARCH2
MARCH4
MARCH8
MARVELD1
MAS1
MAT2A
MAT2B
MATN3
MAVS
MAZ
MBD3
MBIP
MBL2
MBLAC2
MBOAT4
MBP
MBTPS2
MC2R
MC4R
MC5R
MCCC1
MCEMP1
MCFD2
MCM9
MCMDC2
MCTP1
MCU
MDFIC
ME1
ME3
MEA1
MED14OS
MED20
MED26
MED30
MEIG1
MELK
MEPCE
MEPE
MERTK
MESP2
METAP1
METAP1D
METRN
METTL15
METTL21C
METTL22
METTL24
METTL2A
METTL2B
METTL7A
METTL7B
MEX3D
MFAP1
MFAP3
MFAP5
MFF
MFN1
MFSD1
MFSD10
MFSD6
MFSD8
MGST3
MICALL1
MICU1
MICU2
MID1IP1
MIEF1
MIOX
MIP
MIPEP
MIS12
MISP
MITD1
MKNK1
MKRN2
MKRN2OS
MLC1
MLEC
MLST8
MMAB
MMEL1
MMP20
MMP25
MMRN2
MNDA
MOB2
MOB4
MOCOS
MOGAT1
MOGS
MON1A
MORC2
MORN4
MOXD1
MPC1L
MPC2
MPPE1
MPPED1
MPPED2
MPST
MPV17
MPV17L
MPV17L2
MPZ
MRAP2
MREG
MRFAP1
MRGBP
MRGPRG
MRGPRX1
MRGPRX3
MRM1
MROH1
MROH5
MRPL1
MRPL13
MRPL2
MRPL24
MRPL28
MRPL3
MRPL39
MRPL4
MRPL43
MRPL45
MRPL46
MRPL47
MRPL48
MRPL49
MRPL9
MRPS10
MRPS12
MRPS14
MRPS15
MRPS16
MRPS17
MRPS18A
MRPS22
MRPS24
MRPS27
MRPS28
MRPS35
MRPS36
MRS2
MS4A4E
MS4A6A
MS4A7
MSANTD2
MSANTD3
MSANTD4
MSRB2
MST1L
MSTN
MSX2
MT1E
MTCH1
MTCH2
MTERF1
MTERF2
MTFP1
MTHFD2L
MTHFS
MTHFSD
MTIF3
MTMR2
MTMR9
MTRF1
MTTP
MUC21
MUC3A
MVB12A
MX2
MYADM
MYBBP1A
MYF6
MYL1
MYL3
MYL4
MYL6B
MYL7
MYLPF
MYNN
MYO1C
MYPOP
MYSM1
MYZAP
NADK2
NAE1
NAGLU
NANOS2
NANS
NAP1L5
NAPG
NAPSA
NARF
NAT14
NAT8
NBPF4
NCALD
NCAPG
NCBP1
NCBP2
NCCRP1
NCOA5
NCR1
NCR2
NCS1
NDC1
NDEL1
NDFIP1
NDST4
NDUFA10
NDUFA6
NDUFA8
NDUFA9
NDUFAF4
NDUFAF7
NDUFB5
NDUFB8
NDUFC1
NDUFC2-KCTD14
NDUFS3
NDUFS7
NECAB2
NEGR1
NEIL1
NEK3
NEK6
NEK7
NENF
NEU3
NEURL1
NEURL3
NFAM1
NFATC2IP
NFE2
NFIL3
NFKBIB
NFKBID
NFKBIL1
NFRKB
NFS1
NFU1
NFYA
NHLH1
NHLH2
NIP7
NIPA1
NIPAL2
NIPSNAP1
NKAIN2
NKAIN3
NKG7
NKX1-2
NKX2-6
NKX6-3
NLK
NLRP13
NMI
NMNAT2
NMNAT3
NMRAL1
NMRK1
NOBOX
NODAL
NOL12
NOL7
NOL9
NOMO3
NOP16
NOS1AP
NOSTRIN
NOX5
NOXO1
NPAS1
NPDC1
NPIPA1
NPPB
NPS
NPSR1
NPTN
NPY2R
NPY4R
NR2C2AP
NRBF2
NRN1
NRN1L
NRSN1
NSA2
NSDHL
NSL1
NSMCE1
NSMCE4A
NSRP1
NT5C1B-RDH14
NT5DC2
NT5DC4
NTN3
NTSR1
NUB1
NUBPL
NUCB1
NUDCD2
NUDT1
NUDT17
NUDT19
NUDT2
NUDT4
NUDT5
NUDT8
NUFIP2
NUP50
NUP62
NUS1
NUTM2D
NXF5
NXNL1
NXNL2
NXPH1
NXPH4
NYAP1
OBP2A
ODF3
OGDH
OGFOD3
OGFRL1
OLAH
OLFM2
OLFML3
ONECUT3
OPALIN
OPLAH
OPN1LW
OPN1MW2
OPN1SW
OPTC
OR10G2
OR10G4
OR10H5
OR10J1
OR10J3
OR10S1
OR10V1
OR11A1
OR12D3
OR13A1
OR13C5
OR13C8
OR13D1
OR13F1
OR13J1
OR14A2
OR1C1
OR1D5
OR1E1
OR1E2
OR1F1
OR1I1
OR1J4
OR2A25
OR2A5
OR2AK2
OR2B3
OR2C1
OR2D3
OR2F2
OR2J2
OR2S2
OR2T10
OR2T3
OR2T8
OR2V1
OR2V2
OR2W5
OR4C3
OR4D10
OR4D2
OR4D5
OR4P4
OR4Q3
OR51A7
OR51B2
OR51B4
OR51B5
OR51B6
OR51D1
OR51E1
OR51G1
OR51L1
OR51Q1
OR52B6
OR52D1
OR52H1
OR52I2
OR52J3
OR52K2
OR52L1
OR52W1
OR56B1
OR5A2
OR5AK2
OR5B12
OR5B2
OR5B3
OR5C1
OR5D13
[truncated: 1,480 more rows]

## Sheet: Table S8
EARN: an ensemble machine learning algorithm to predict driver genes in metastatic breast cancer
Leila Mirsadeghi1, Reza Haji Hosseini1*, Ali Mohammad Banaei-Moghaddam2, Kaveh Kavousi3*
* Correspondence: kkavousi@ut.ac.ir; hosseini@pnu.ac.ir;
1Department of Biology, Faculty of Science, Payame Noor University, Tehran, Iran
2 Laboratory of Genomics and Epigenomics (LGE), Department of Biochemistry, Institute of Biochemistry and Biophysics (IBB), University of Tehran, Tehran, Iran
3 Laboratory of Complex Biological Systems and Bioinformatics (CBB), Department of Bioinformatics, Institute of Biochemistry and Biophysics (IBB), University of Tehran, Tehran, Iran
Additional file 4: Table S8 20208 Homo sapiens annotated genes as protein-coding from NCBI (February 2019)
A1BG
A1CF
A2M
A2ML1
A3GALT2
A4GALT
A4GNT
AAAS
AACS
AADAC
AADACL2
AADACL3
AADACL4
AADAT
AAGAB
AAK1
AAMDC
AAMP
AANAT
AAR2
AARD
AARS
AARS2
AARSD1
AASDH
AASDHPPT
AASS
AATF
AATK
ABAT
ABCA1
ABCA10
ABCA12
ABCA13
ABCA2
ABCA3
ABCA4
ABCA5
ABCA6
ABCA7
ABCA8
ABCA9
ABCB1
ABCB10
ABCB11
ABCB4
ABCB5
ABCB6
ABCB7
ABCB8
ABCB9
ABCC1
ABCC10
ABCC11
ABCC12
ABCC2
ABCC3
ABCC4
ABCC5
ABCC6
ABCC8
ABCC9
ABCD1
ABCD2
ABCD3
ABCD4
ABCE1
ABCF1
ABCF2
ABCF3
ABCG1
ABCG2
ABCG4
ABCG5
ABCG8
ABHD1
ABHD10
ABHD11
ABHD12
ABHD12B
ABHD13
ABHD14A
ABHD14A-ACY1
ABHD14B
ABHD15
ABHD16A
ABHD16B
ABHD17A
ABHD17B
ABHD17C
ABHD18
ABHD2
ABHD3
ABHD4
ABHD5
ABHD6
ABHD8
ABI1
ABI2
ABI3
ABI3BP
ABITRAM
ABL1
ABL2
ABLIM1
ABLIM2
ABLIM3
ABO
ABR
ABRA
ABRACL
ABRAXAS1
ABRAXAS2
ABT1
ABTB1
ABTB2
ACAA1
ACAA2
ACACA
ACACB
ACAD10
ACAD11
ACAD8
ACAD9
ACADL
ACADM
ACADS
ACADSB
ACADVL
ACAN
ACAP1
ACAP2
ACAP3
ACAT1
ACAT2
ACBD3
ACBD4
ACBD5
ACBD6
ACBD7
ACCS
ACCSL
ACD
ACE
ACE2
ACER1
ACER2
ACER3
ACHE
ACIN1
ACKR1
ACKR2
ACKR3
ACKR4
ACLY
ACMSD
ACO1
ACO2
ACOD1
ACOT1
ACOT11
ACOT12
ACOT13
ACOT2
ACOT4
ACOT6
ACOT7
ACOT8
ACOT9
ACOX1
ACOX2
ACOX3
ACOXL
ACP1
ACP2
ACP4
ACP5
ACP6
ACP7
ACPP
ACR
ACRBP
ACRV1
ACSBG1
ACSBG2
ACSF2
ACSF3
ACSL1
ACSL3
ACSL4
ACSL5
ACSL6
ACSM1
ACSM2A
ACSM2B
ACSM3
ACSM4
ACSM5
ACSM6
ACSS1
ACSS2
ACSS3
ACTA1
ACTA2
ACTB
ACTBL2
ACTC1
ACTG1
ACTG2
ACTL10
ACTL6A
ACTL6B
ACTL7A
ACTL7B
ACTL8
ACTL9
ACTN1
ACTN2
ACTN3
ACTN4
ACTR10
ACTR1A
ACTR1B
ACTR2
ACTR3
ACTR3B
ACTR3C
ACTR5
ACTR6
ACTR8
ACTRT1
ACTRT2
ACTRT3
ACVR1
ACVR1B
ACVR1C
ACVR2A
ACVR2B
ACVRL1
ACY1
ACY3
ACYP1
ACYP2
ADA
ADA2
ADAD1
ADAD2
ADAL
ADAM10
ADAM11
ADAM12
ADAM15
ADAM17
ADAM18
ADAM19
ADAM2
ADAM20
ADAM21
ADAM22
ADAM23
ADAM28
ADAM29
ADAM30
ADAM32
ADAM33
ADAM7
ADAM8
ADAM9
ADAMDEC1
ADAMTS1
ADAMTS10
ADAMTS12
ADAMTS13
ADAMTS14
ADAMTS15
ADAMTS16
ADAMTS17
ADAMTS18
ADAMTS19
ADAMTS2
ADAMTS20
ADAMTS3
ADAMTS4
ADAMTS5
ADAMTS6
ADAMTS7
ADAMTS8
ADAMTS9
ADAMTSL1
ADAMTSL2
ADAMTSL3
ADAMTSL4
ADAMTSL5
ADAP1
ADAP2
ADAR
ADARB1
ADARB2
ADAT1
ADAT2
ADAT3
ADCK1
ADCK2
ADCK5
ADCY1
ADCY10
ADCY2
ADCY3
ADCY4
ADCY5
ADCY6
ADCY7
ADCY8
ADCY9
ADCYAP1
ADCYAP1R1
ADD1
ADD2
ADD3
ADGB
ADGRA1
ADGRA2
ADGRA3
ADGRB1
ADGRB2
ADGRB3
ADGRD1
ADGRD2
ADGRE1
ADGRE2
ADGRE3
ADGRE5
ADGRF1
ADGRF2
ADGRF3
ADGRF4
ADGRF5
ADGRG1
ADGRG2
ADGRG3
ADGRG4
ADGRG5
ADGRG6
ADGRG7
ADGRL1
ADGRL2
ADGRL3
ADGRL4
ADGRV1
ADH1A
ADH1B
ADH1C
ADH4
ADH5
ADH6
ADH7
ADHFE1
ADI1
ADIG
ADIPOQ
ADIPOR1
ADIPOR2
ADIRF
ADK
ADM
ADM2
ADM5
ADNP
ADNP2
ADO
ADORA1
ADORA2A
ADORA2B
ADORA3
ADPGK
ADPRH
ADPRHL1
ADPRHL2
ADPRM
ADRA1A
ADRA1B
ADRA1D
ADRA2A
ADRA2B
ADRA2C
ADRB1
ADRB2
ADRB3
ADRM1
ADSL
ADSS
ADSSL1
ADTRP
AEBP1
AEBP2
AEN
AES
AFAP1
AFAP1L1
AFAP1L2
AFDN
AFF1
AFF2
AFF3
AFF4
AFG1L
AFG3L2
AFM
AFMID
AFP
AFTPH
AGA
AGAP1
AGAP11
AGAP2
AGAP3
AGAP4
AGAP5
AGAP6
AGAP9
AGBL1
AGBL2
AGBL3
AGBL4
AGBL5
AGER
AGFG1
AGFG2
AGGF1
AGK
AGL
AGMAT
AGMO
AGO1
AGO2
AGO3
AGO4
AGPAT1
AGPAT2
AGPAT3
AGPAT4
AGPAT5
AGPS
AGR2
AGR3
AGRN
AGRP
AGT
AGTPBP1
AGTR1
AGTR2
AGTRAP
AGXT
AGXT2
AHCTF1
AHCY
AHCYL1
AHCYL2
AHDC1
AHI1
AHNAK
AHNAK2
AHR
AHRR
AHSA1
AHSG
AHSP
AICDA
AIDA
AIF1
AIF1L
AIFM1
AIFM2
AIFM3
AIG1
AIM2
AIMP1
AIMP2
AIP
AIPL1
AIRE
AJAP1
AJM1
AJUBA
AK1
AK2
AK3
AK4
AK5
AK6
AK7
AK8
AK9
AKAIN1
AKAP1
AKAP10
AKAP11
AKAP12
AKAP13
AKAP14
AKAP17A
AKAP2
AKAP3
AKAP4
AKAP5
AKAP6
AKAP7
AKAP8
AKAP8L
AKAP9
AKIP1
AKIRIN1
AKIRIN2
AKNA
AKNAD1
AKR1A1
AKR1B1
AKR1B10
AKR1B15
AKR1C1
AKR1C2
AKR1C3
AKR1C4
AKR1D1
AKR1E2
AKR7A2
AKR7A3
AKR7L
AKT1
AKT1S1
AKT2
AKT3
AKTIP
ALAD
ALAS1
ALAS2
ALB
ALCAM
ALDH16A1
ALDH18A1
ALDH1A1
ALDH1A2
ALDH1A3
ALDH1B1
ALDH1L1
ALDH1L2
ALDH2
ALDH3A1
ALDH3A2
ALDH3B1
ALDH3B2
ALDH4A1
ALDH5A1
ALDH6A1
ALDH7A1
ALDH8A1
ALDH9A1
ALDOA
ALDOB
ALDOC
ALG1
ALG10
ALG10B
ALG11
ALG12
ALG13
ALG14
ALG1L
ALG1L2
ALG2
ALG3
ALG5
ALG6
ALG8
ALG9
ALK
ALKAL1
ALKAL2
ALKBH1
ALKBH2
ALKBH3
ALKBH4
ALKBH5
ALKBH6
ALKBH7
ALKBH8
ALLC
ALMS1
ALOX12
ALOX12B
ALOX15
ALOX15B
ALOX5
ALOX5AP
ALOXE3
ALPG
ALPI
ALPK1
ALPK2
ALPK3
ALPL
ALPP
ALS2
ALS2CL
ALS2CR12
ALX1
ALX3
ALX4
ALYREF
AMACR
AMBN
AMBP
AMBRA1
AMD1
AMDHD1
AMDHD2
AMELX
AMELY
AMER1
AMER2
AMER3
AMFR
AMH
AMHR2
AMIGO1
AMIGO2
AMIGO3
AMMECR1
AMMECR1L
AMN
AMN1
AMOT
AMOTL1
AMOTL2
AMPD1
AMPD2
AMPD3
AMPH
AMT
AMTN
AMY1A
AMY1B
AMY1C
AMY2A
AMY2B
AMZ1
AMZ2
ANAPC1
ANAPC10
ANAPC11
ANAPC13
ANAPC15
ANAPC16
ANAPC2
ANAPC4
ANAPC5
ANAPC7
ANG
ANGEL1
ANGEL2
ANGPT1
ANGPT2
ANGPT4
ANGPTL1
ANGPTL2
ANGPTL3
ANGPTL4
ANGPTL5
ANGPTL6
ANGPTL7
ANGPTL8
ANHX
ANK1
ANK2
ANK3
ANKAR
ANKDD1A
ANKDD1B
ANKEF1
ANKFN1
ANKFY1
ANKH
ANKHD1
ANKHD1-EIF4EBP3
ANKIB1
ANKK1
ANKLE1
ANKLE2
ANKMY1
ANKMY2
ANKRA2
ANKRD1
ANKRD10
ANKRD11
ANKRD12
ANKRD13A
ANKRD13B
ANKRD13C
ANKRD13D
ANKRD16
ANKRD17
ANKRD18A
ANKRD18B
ANKRD2
ANKRD20A1
ANKRD20A2
ANKRD20A3
ANKRD20A4
ANKRD22
ANKRD23
ANKRD24
ANKRD26
ANKRD27
ANKRD28
ANKRD29
ANKRD30A
ANKRD30B
ANKRD30BL
ANKRD31
ANKRD33
ANKRD33B
ANKRD34A
ANKRD34B
ANKRD34C
ANKRD35
ANKRD36
ANKRD36B
ANKRD36C
ANKRD37
ANKRD39
ANKRD40
ANKRD40CL
ANKRD42
ANKRD44
ANKRD45
ANKRD46
ANKRD49
ANKRD50
ANKRD52
ANKRD53
ANKRD54
ANKRD55
ANKRD6
ANKRD60
ANKRD61
ANKRD62
ANKRD63
ANKRD65
ANKRD66
ANKRD7
ANKRD9
ANKS1A
ANKS1B
ANKS3
ANKS4B
ANKS6
ANKUB1
ANKZF1
ANLN
ANO1
ANO10
ANO2
ANO3
ANO4
ANO5
ANO6
ANO7
ANO8
ANO9
ANOS1
ANP32A
ANP32B
ANP32C
ANP32D
ANP32E
ANPEP
ANTXR1
ANTXR2
ANTXRL
ANXA1
ANXA10
ANXA11
ANXA13
ANXA2
ANXA2R
ANXA3
ANXA4
ANXA5
ANXA6
ANXA7
ANXA8
ANXA8L1
ANXA9
AOAH
AOC1
AOC2
AOC3
AOPEP
AOX1
AP1AR
AP1B1
AP1G1
AP1G2
AP1M1
AP1M2
AP1S1
AP1S2
AP1S3
AP2A1
AP2A2
AP2B1
AP2M1
AP2S1
AP3B1
AP3B2
AP3D1
AP3M1
AP3M2
AP3S1
AP3S2
AP4B1
AP4E1
AP4M1
AP4S1
AP5B1
AP5M1
AP5S1
AP5Z1
APAF1
APBA1
APBA2
APBA3
APBB1
APBB1IP
APBB2
APBB3
APC
APC2
APCDD1
APCDD1L
APCS
APEH
APELA
APEX1
APEX2
APH1A
APH1B
API5
APIP
APLF
APLN
APLNR
APLP1
APLP2
APMAP
APOA1
APOA2
APOA4
APOA5
APOB
APOBEC1
APOBEC2
APOBEC3A
APOBEC3A_B
APOBEC3B
APOBEC3C
APOBEC3D
APOBEC3F
APOBEC3G
APOBEC3H
APOBEC4
APOBR
APOC1
APOC2
APOC3
APOC4
APOD
APOE
APOF
APOH
APOL1
APOL2
APOL3
APOL4
APOL5
APOL6
APOLD1
APOM
APOO
APOOL
APOPT1
APP
APPBP2
APPL1
APPL2
APRT
APTX
AQP1
AQP10
AQP11
AQP12A
AQP12B
AQP2
AQP3
AQP4
AQP5
AQP6
AQP7
AQP8
AQP9
AQR
AR
ARAF
ARAP1
ARAP2
ARAP3
ARC
ARCN1
AREG
AREL1
ARF1
ARF3
ARF4
ARF5
ARF6
ARFGAP1
ARFGAP2
ARFGAP3
ARFGEF1
ARFGEF2
ARFGEF3
ARFIP1
ARFIP2
ARFRP1
ARG1
ARG2
ARGFX
ARGLU1
ARHGAP1
ARHGAP10
ARHGAP11A
ARHGAP11B
ARHGAP12
ARHGAP15
ARHGAP17
ARHGAP18
ARHGAP19
ARHGAP20
ARHGAP21
ARHGAP22
ARHGAP23
ARHGAP24
ARHGAP25
ARHGAP26
ARHGAP27
ARHGAP28
ARHGAP29
ARHGAP30
ARHGAP31
ARHGAP32
ARHGAP33
ARHGAP35
ARHGAP36
ARHGAP39
ARHGAP4
ARHGAP40
ARHGAP42
ARHGAP44
ARHGAP45
ARHGAP5
ARHGAP6
ARHGAP8
ARHGAP9
ARHGDIA
ARHGDIB
ARHGDIG
ARHGEF1
ARHGEF10
ARHGEF10L
ARHGEF11
ARHGEF12
ARHGEF15
ARHGEF16
ARHGEF17
ARHGEF18
ARHGEF19
ARHGEF2
ARHGEF25
ARHGEF26
ARHGEF28
ARHGEF3
ARHGEF33
ARHGEF35
ARHGEF37
ARHGEF38
ARHGEF39
ARHGEF4
ARHGEF40
ARHGEF5
ARHGEF6
ARHGEF7
ARHGEF9
ARID1A
ARID1B
ARID2
ARID3A
ARID3B
ARID3C
ARID4A
ARID4B
ARID5A
ARID5B
ARIH1
ARIH2
ARIH2OS
ARL1
ARL10
ARL11
ARL13A
ARL13B
ARL14
ARL14EP
ARL14EPL
ARL15
ARL16
ARL17A
ARL17B
ARL2
ARL2BP
ARL3
ARL4A
ARL4C
ARL4D
ARL5A
ARL5B
ARL5C
ARL6
ARL6IP1
ARL6IP4
ARL6IP5
ARL6IP6
ARL8A
ARL8B
ARL9
ARMC1
ARMC10
ARMC12
ARMC2
ARMC3
ARMC4
ARMC5
ARMC6
ARMC7
ARMC8
ARMC9
ARMCX1
ARMCX2
ARMCX3
ARMCX4
ARMCX5
ARMCX5-GPRASP2
ARMCX6
ARMH1
ARMH2
ARMH3
ARMH4
ARMS2
ARMT1
ARNT
ARNT2
ARNTL
ARNTL2
ARPC1A
ARPC1B
ARPC2
ARPC3
ARPC4
ARPC4-TTLL3
ARPC5
ARPC5L
ARPIN
ARPIN-AP3S2
ARPP19
ARPP21
ARR3
ARRB1
ARRB2
ARRDC1
ARRDC2
ARRDC3
ARRDC4
ARRDC5
ARSA
ARSB
ARSD
ARSE
ARSF
ARSG
ARSH
ARSI
ARSJ
ARSK
ART1
ART3
ART4
ART5
ARTN
ARV1
ARVCF
ARX
AS3MT
ASAH1
ASAH2
ASAH2B
ASAP1
ASAP2
ASAP3
ASB1
ASB10
ASB11
ASB12
ASB13
ASB14
ASB15
ASB16
ASB17
ASB18
ASB2
ASB3
ASB4
ASB5
ASB6
ASB7
ASB8
ASB9
ASCC1
ASCC2
ASCC3
ASCL1
ASCL2
ASCL3
ASCL4
ASCL5
ASDURF
ASF1A
ASF1B
ASGR1
ASGR2
ASH1L
ASH2L
ASIC1
ASIC2
ASIC3
ASIC4
ASIC5
ASIP
ASL
ASMT
ASMTL
ASNA1
ASNS
ASNSD1
ASPA
ASPDH
ASPG
ASPH
ASPHD1
ASPHD2
ASPM
ASPN
ASPRV1
ASPSCR1
ASRGL1
ASS1
ASTE1
ASTL
ASTN1
ASTN2
ASXL1
ASXL2
ASXL3
ASZ1
ATAD1
ATAD2
ATAD2B
ATAD3A
ATAD3B
ATAD3C
ATAD5
ATAT1
ATCAY
ATE1
ATF1
ATF2
ATF3
ATF4
ATF5
ATF6
ATF6B
ATF7
ATF7IP
ATF7IP2
ATF7-NPFF
ATG10
ATG101
ATG12
ATG13
ATG14
ATG16L1
ATG16L2
ATG2A
ATG2B
ATG3
ATG4A
ATG4B
ATG4C
ATG4D
ATG5
ATG7
ATG9A
ATG9B
ATIC
ATL1
ATL2
ATL3
ATM
ATMIN
ATN1
ATOH1
ATOH7
ATOH8
ATOX1
ATP10A
ATP10B
ATP10D
ATP11A
ATP11AUN
ATP11B
ATP11C
ATP12A
ATP13A1
ATP13A2
ATP13A3
ATP13A4
ATP13A5
ATP1A1
ATP1A2
ATP1A3
ATP1A4
ATP1B1
ATP1B2
ATP1B3
ATP1B4
ATP23
ATP2A1
ATP2A2
ATP2A3
ATP2B1
ATP2B2
ATP2B3
ATP2B4
ATP2C1
ATP2C2
ATP4A
ATP4B
ATP5F1A
ATP5F1B
ATP5F1C
ATP5F1D
ATP5F1E
ATP5IF1
ATP5MC1
ATP5MC2
ATP5MC3
ATP5MD
ATP5ME
ATP5MF
ATP5MF-PTCD1
ATP5MG
ATP5MGL
ATP5MPL
ATP5PB
ATP5PD
ATP5PF
ATP5PO
ATP6
ATP6
ATP6
ATP6AP1
ATP6AP1L
ATP6AP2
ATP6V0A1
ATP6V0A2
ATP6V0A4
ATP6V0B
ATP6V0C
ATP6V0D1
ATP6V0D2
ATP6V0E1
ATP6V0E2
ATP6V1A
ATP6V1B1
ATP6V1B2
ATP6V1C1
ATP6V1C2
ATP6V1D
ATP6V1E1
ATP6V1E2
ATP6V1F
ATP6V1FNB
ATP6V1G1
ATP6V1G2
ATP6V1G3
ATP6V1H
ATP7A
ATP7B
ATP8
ATP8
ATP8
ATP8A1
ATP8A2
ATP8B1
ATP8B2
ATP8B3
ATP8B4
ATP9A
ATP9B
ATPAF1
ATPAF2
ATPSCKMT
ATR
ATRAID
ATRIP
ATRN
ATRNL1
ATRX
ATXN1
ATXN10
ATXN1L
ATXN2
ATXN2L
ATXN3
ATXN3L
ATXN7
ATXN7L1
ATXN7L2
ATXN7L3
ATXN7L3B
ATXN8
AUH
AUNIP
AUP1
AURKA
AURKAIP1
AURKB
AURKC
AUTS2
AVEN
AVIL
AVL9
AVP
AVPI1
AVPR1A
AVPR1B
AVPR2
AWAT1
AWAT2
AXDND1
AXIN1
AXIN2
AXL
AZGP1
AZI2
AZIN1
AZIN2
AZU1
B2M
B3GALNT1
B3GALNT2
B3GALT1
B3GALT2
B3GALT4
B3GALT5
B3GALT6
B3GAT1
B3GAT2
B3GAT3
B3GLCT
B3GNT2
B3GNT3
B3GNT4
B3GNT5
B3GNT6
B3GNT7
B3GNT8
B3GNT9
B3GNTL1
B4GALNT1
B4GALNT2
B4GALNT3
B4GALNT4
B4GALT1
B4GALT2
B4GALT3
B4GALT4
B4GALT5
B4GALT6
B4GALT7
B4GAT1
B9D1
B9D2
BAALC
BAAT
BABAM1
BABAM2
BACE1
BACE2
BACH1
BACH2
BAD
BAG1
BAG2
BAG3
BAG4
BAG5
BAG6
BAGE
BAGE2
BAGE3
BAGE4
BAGE5
BAHCC1
BAHD1
BAIAP2
BAIAP2L1
BAIAP2L2
BAIAP3
BAK1
BAMBI
BANF1
BANF2
BANK1
BANP
BAP1
BARD1
BARHL1
BARHL2
BARX1
BARX2
BASP1
BATF
BATF2
BATF3
BAX
BAZ1A
BAZ1B
BAZ2A
BAZ2B
BBC3
BBIP1
BBOF1
BBOX1
BBS1
BBS10
BBS12
BBS2
BBS4
BBS5
BBS7
BBS9
BBX
BCAM
BCAN
BCAP29
BCAP31
BCAR1
BCAR3
BCAS1
BCAS2
BCAS3
BCAS4
BCAT1
BCAT2
BCCIP
BCDIN3D
BCHE
BCKDHA
BCKDHB
BCKDK
BCL10
BCL11A
BCL11B
BCL2
BCL2A1
BCL2L1
BCL2L10
BCL2L11
BCL2L12
BCL2L13
BCL2L14
BCL2L15
BCL2L2
BCL2L2-PABPN1
BCL3
BCL6
BCL6B
BCL7A
BCL7B
BCL7C
BCL9
BCL9L
BCLAF1
BCLAF3
BCO1
BCO2
BCOR
BCORL1
BCR
BCS1L
BDH1
BDH2
BDKRB1
BDKRB2
BDNF
BDP1
BEAN1
BECN1
BECN2
BEGAIN
BEND2
BEND3
BEND4
BEND5
BEND6
BEND7
BEST1
BEST2
BEST3
BEST4
BET1
BET1L
BEX1
BEX2
BEX3
BEX4
BEX5
BFAR
BFSP1
BFSP2
BGLAP
BGN
BHLHA15
BHLHA9
BHLHB9
BHLHE22
BHLHE23
BHLHE40
BHLHE41
BHMG1
BHMT
BHMT2
BICC1
BICD1
BICD2
BICDL1
BICDL2
BICRA
BICRAL
BID
BIK
BIN1
BIN2
BIN3
BIRC2
BIRC3
BIRC5
BIRC6
BIRC7
BIVM
BIVM-ERCC5
BLCAP
BLID
BLK
BLM
BLMH
BLNK
BLOC1S1
BLOC1S2
BLOC1S3
BLOC1S4
BLOC1S5
BLOC1S6
BLVRA
BLVRB
BLZF1
BMF
BMI1
BMP1
BMP10
BMP15
BMP2
BMP2K
BMP3
BMP4
BMP5
BMP6
BMP7
BMP8A
BMP8B
BMPER
BMPR1A
BMPR1B
BMPR2
BMS1
BMT2
BMX
BNC1
BNC2
BNIP1
BNIP2
BNIP3
BNIP3L
BNIPL
BOC
BOD1
BOD1L1
BOD1L2
BOK
BOLA1
BOLA2
BOLA2B
BOLA2-SMG1P6
BOLA3
BOLL
BOP1
BORA
BORCS5
BORCS6
BORCS7
BORCS8
BORCS8-MEF2B
BPGM
BPHL
BPI
BPIFA1
BPIFA2
BPIFA3
BPIFB1
BPIFB2
BPIFB3
BPIFB4
BPIFB6
BPIFC
BPNT1
BPTF
BPY2
BPY2B
BPY2C
BRAF
BRAP
BRAT1
BRCA1
BRCA2
BRCC3
BRD1
BRD2
BRD3
BRD3OS
BRD4
BRD7
BRD8
BRD9
BRDT
BRF1
BRF2
BRI3
BRI3BP
BRICD5
BRINP1
BRINP2
BRINP3
BRIP1
BRIX1
BRK1
BRMS1
BRMS1L
BROX
BRPF1
BRPF3
BRS3
BRSK1
BRSK2
BRWD1
BRWD3
BSCL2
BSDC1
BSG
BSN
BSND
BSPH1
BSPRY
BST1
BST2
BSX
BTAF1
BTBD1
BTBD10
BTBD11
BTBD16
BTBD17
BTBD18
BTBD19
BTBD2
BTBD3
BTBD6
BTBD7
BTBD8
BTBD9
BTC
BTD
BTF3
BTF3L4
BTG1
BTG2
BTG3
BTG4
BTK
BTLA
BTN1A1
BTN2A1
BTN2A2
BTN3A1
BTN3A2
BTN3A3
BTNL10
BTNL2
BTNL3
BTNL8
BTNL9
BTRC
BUB1
BUB1B
BUB1B-PAK6
BUB3
BUD13
BUD23
BUD31
BVES
BYSL
BZW1
BZW2
C10orf105
C10orf111
C10orf113
C10orf120
C10orf126
C10orf142
C10orf143
C10orf25
C10orf53
C10orf55
C10orf62
C10orf67
C10orf71
C10orf82
C10orf88
C10orf90
C10orf95
C10orf99
C11orf1
C11orf16
C11orf21
C11orf24
C11orf40
C11orf42
C11orf44
C11orf45
C11orf49
C11orf52
C11orf53
C11orf54
C11orf58
C11orf65
C11orf68
C11orf71
C11orf74
C11orf80
C11orf86
C11orf87
C11orf88
C11orf91
C11orf94
C11orf95
C11orf96
C11orf97
C11orf98
C12orf10
C12orf29
C12orf4
C12orf40
C12orf42
C12orf43
C12orf45
C12orf49
C12orf50
C12orf54
C12orf56
C12orf57
C12orf60
C12orf65
C12orf66
C12orf71
C12orf73
C12orf74
C12orf75
C12orf76
C12orf77
C12orf80
C12orf81
C13orf42
C13orf46
C14orf119
C14orf132
C14orf177
C14orf178
C14orf180
C14orf28
C14orf39
C14orf93
C15orf32
C15orf39
C15orf40
C15orf41
C15orf48
C15orf53
C15orf56
C15orf61
C15orf62
C15orf65
C16orf45
C16orf46
C16orf47
C16orf54
C16orf58
C16orf70
C16orf71
C16orf72
C16orf74
C16orf78
C16orf82
C16orf86
C16orf87
C16orf89
C16orf90
C16orf91
C16orf92
C16orf95
C16orf96
C16orf97
C17orf100
C17orf102
C17orf107
C17orf112
C17orf113
C17orf47
C17orf49
C17orf50
C17orf51
C17orf53
C17orf58
C17orf64
C17orf67
C17orf75
C17orf77
C17orf78
C17orf80
C17orf82
C17orf97
C17orf98
C17orf99
C18orf12
C18orf21
C18orf25
C18orf32
C18orf54
C18orf63
C18orf65
C19orf12
C19orf18
C19orf24
C19orf25
C19orf33
C19orf38
C19orf44
C19orf47
C19orf48
C19orf53
C19orf54
C19orf57
C19orf66
C19orf67
C19orf71
C19orf73
C19orf81
C19orf84
C19orf85
C1D
C1GALT1
C1GALT1C1
C1GALT1C1L
C1orf100
C1orf105
C1orf109
C1orf112
C1orf115
C1orf116
C1orf122
C1orf127
C1orf131
C1orf134
C1orf141
C1orf146
C1orf147
C1orf158
C1orf159
C1orf162
C1orf167
C1orf174
C1orf185
C1orf189
C1orf194
C1orf195
C1orf196
C1orf198
C1orf21
C1orf210
C1orf216
C1orf226
C1orf229
C1orf232
C1orf35
C1orf43
C1orf50
C1orf52
C1orf53
C1orf54
C1orf56
C1orf61
C1orf68
C1orf74
C1orf87
C1orf94
C1QA
C1QB
C1QBP
C1QC
C1QL1
C1QL2
C1QL3
C1QL4
C1QTNF1
C1QTNF12
C1QTNF2
C1QTNF3
C1QTNF4
C1QTNF5
C1QTNF6
C1QTNF7
C1QTNF8
C1QTNF9
C1QTNF9B
C1R
C1RL
C1S
C2
C20orf141
C20orf144
C20orf173
C20orf194
C20orf197
C20orf202
C20orf203
C20orf204
C20orf27
C20orf78
C20orf85
C20orf96
C21orf58
C21orf59-TCP10L
C21orf62
C21orf91
C22orf15
C22orf23
[truncated: 18,215 more rows]

## Sheet: Table S9
EARN: an ensemble machine learning algorithm to predict driver genes in metastatic breast cancer
Leila Mirsadeghi1, Reza Haji Hosseini1*, Ali Mohammad Banaei-Moghaddam2, Kaveh Kavousi3*
* Correspondence: kkavousi@ut.ac.ir; hosseini@pnu.ac.ir;
1Department of Biology, Faculty of Science, Payame Noor University, Tehran, Iran
2 Laboratory of Genomics and Epigenomics (LGE), Department of Biochemistry, Institute of Biochemistry and Biophysics (IBB), University of Tehran, Tehran, Iran
3 Laboratory of Complex Biological Systems and Bioinformatics (CBB), Department of Bioinformatics, Institute of Biochemistry and Biophysics (IBB), University of Tehran, Tehran, Iran
Additional file 4: Table S9 18017 genes as genome-wide screening data for BRCA after excluding positive and negative training sets
A1BG
A1CF
A2M
A2ML1
A3GALT2
AAAS
AACS
AADAC
AADACL2
AADACL3
AADACL4
AADAT
AAK1
AAMDC
AAMP
AAR2
AARD
AARS
AARS2
AARSD1
AASDH
AASDHPPT
AASS
AATF
AATK
ABAT
ABCA1
ABCA10
ABCA12
ABCA13
ABCA2
ABCA3
ABCA4
ABCA5
ABCA6
ABCA7
ABCA8
ABCA9
ABCB1
ABCB10
ABCB11
ABCB4
ABCB5
ABCB6
ABCB7
ABCB8
ABCB9
ABCC1
ABCC10
ABCC11
ABCC12
ABCC2
ABCC3
ABCC4
ABCC5
ABCC6
ABCC8
ABCC9
ABCD1
ABCD2
ABCD3
ABCD4
ABCE1
ABCF1
ABCF2
ABCF3
ABCG1
ABCG2
ABCG4
ABCG5
ABCG8
ABHD10
ABHD11
ABHD12
ABHD12B
ABHD13
ABHD14A
ABHD16A
ABHD16B
ABHD17C
ABHD18
ABHD2
ABHD3
ABHD4
ABI1
ABI2
ABI3
ABI3BP
ABITRAM
ABL1
ABL2
ABLIM1
ABLIM2
ABLIM3
ABO
ABR
ABRA
ABRACL
ABRAXAS1
ABRAXAS2
ABT1
ABTB1
ABTB2
ACAA1
ACAA2
ACACA
ACACB
ACAD10
ACAD11
ACAD8
ACAD9
ACADM
ACADS
ACADSB
ACADVL
ACAN
ACAP1
ACAP2
ACAT1
ACAT2
ACBD3
ACBD4
ACBD5
ACCS
ACCSL
ACD
ACE
ACE2
ACER2
ACER3
ACHE
ACIN1
ACKR1
ACKR2
ACKR3
ACKR4
ACLY
ACMSD
ACO1
ACO2
ACOD1
ACOT11
ACOT2
ACOT4
ACOT6
ACOT8
ACOT9
ACOX1
ACOX2
ACOX3
ACOXL
ACP1
ACP2
ACP4
ACP5
ACP6
ACP7
ACPP
ACR
ACRBP
ACRV1
ACSBG1
ACSBG2
ACSF2
ACSF3
ACSL1
ACSL3
ACSL4
ACSL5
ACSL6
ACSM1
ACSM2A
ACSM2B
ACSM3
ACSM4
ACSM5
ACSM6
ACSS1
ACSS2
ACSS3
ACTA1
ACTA2
ACTB
ACTBL2
ACTC1
ACTG1
ACTG2
ACTL6A
ACTL6B
ACTL7A
ACTL7B
ACTL8
ACTL9
ACTN1
ACTN2
ACTN3
ACTN4
ACTR10
ACTR1A
ACTR1B
ACTR2
ACTR3
ACTR3B
ACTR3C
ACTR5
ACTR6
ACTR8
ACTRT1
ACTRT2
ACTRT3
ACVR1
ACVR1B
ACVR1C
ACVR2A
ACVR2B
ACY1
ACYP1
ACYP2
ADA
ADA2
ADAD1
ADAD2
ADAL
ADAM10
ADAM11
ADAM12
ADAM15
ADAM17
ADAM18
ADAM19
ADAM2
ADAM20
ADAM21
ADAM22
ADAM23
ADAM28
ADAM29
ADAM30
ADAM32
ADAM33
ADAM7
ADAM8
ADAM9
ADAMDEC1
ADAMTS1
ADAMTS10
ADAMTS12
ADAMTS13
ADAMTS14
ADAMTS15
ADAMTS16
ADAMTS17
ADAMTS18
ADAMTS19
ADAMTS2
ADAMTS20
ADAMTS3
ADAMTS4
ADAMTS5
ADAMTS6
ADAMTS7
ADAMTS8
ADAMTS9
ADAMTSL1
ADAMTSL2
ADAMTSL3
ADAMTSL4
ADAP2
ADAR
ADARB1
ADARB2
ADAT2
ADAT3
ADCK1
ADCK2
ADCK5
ADCY1
ADCY10
ADCY2
ADCY3
ADCY4
ADCY5
ADCY6
ADCY7
ADCY8
ADCY9
ADCYAP1
ADCYAP1R1
ADD1
ADD2
ADD3
ADGB
ADGRA1
ADGRA2
ADGRA3
ADGRB1
ADGRB2
ADGRB3
ADGRD1
ADGRD2
ADGRE1
ADGRE2
ADGRE3
ADGRE5
ADGRF1
ADGRF2
ADGRF3
ADGRF5
ADGRG1
ADGRG2
ADGRG3
ADGRG4
ADGRG5
ADGRG6
ADGRG7
ADGRL1
ADGRL2
ADGRL3
ADGRL4
ADGRV1
ADH1A
ADH1B
ADH1C
ADH5
ADH6
ADH7
ADHFE1
ADIPOQ
ADIPOR2
ADIRF
ADM
ADM2
ADM5
ADNP
ADNP2
ADO
ADORA1
ADORA2A
ADORA2B
ADORA3
ADPGK
ADPRH
ADPRHL1
ADPRHL2
ADRA1A
ADRA1D
ADRA2A
ADRA2B
ADRA2C
ADRB1
ADRB2
ADRB3
ADRM1
ADSL
ADSS
ADSSL1
ADTRP
AEBP1
AEBP2
AES
AFAP1
AFAP1L1
AFAP1L2
AFDN
AFF1
AFF2
AFF3
AFF4
AFG1L
AFG3L2
AFM
AFMID
AFP
AFTPH
AGAP1
AGAP11
AGAP2
AGAP3
AGAP4
AGAP5
AGAP6
AGAP9
AGBL1
AGBL2
AGBL3
AGBL4
AGBL5
AGER
AGFG1
AGFG2
AGGF1
AGK
AGL
AGMAT
AGMO
AGO1
AGO2
AGO3
AGO4
AGPAT2
AGPAT3
AGPAT4
AGPS
AGR2
AGR3
AGRN
AGRP
AGT
AGTPBP1
AGTR1
AGTR2
AGXT
AGXT2
AHCTF1
AHCY
AHCYL1
AHCYL2
AHI1
AHNAK
AHNAK2
AHR
AHRR
AHSA1
AHSP
AICDA
AIDA
AIF1L
AIFM1
AIFM2
AIFM3
AIG1
AIM2
AIP
AJAP1
AJM1
AJUBA
AK1
AK3
AK4
AK5
AK6
AK7
AK8
AK9
AKAIN1
AKAP1
AKAP10
AKAP11
AKAP12
AKAP13
AKAP14
AKAP17A
AKAP2
AKAP3
AKAP4
AKAP5
AKAP6
AKAP8
AKAP8L
AKAP9
AKIRIN1
AKNA
AKNAD1
AKR1A1
AKR1B10
AKR1C1
AKR1C2
AKR1C3
AKR1C4
AKR1D1
AKR1E2
AKT2
AKT3
AKTIP
ALAD
ALAS1
ALAS2
ALB
ALCAM
ALDH16A1
ALDH18A1
ALDH1A1
ALDH1A3
ALDH1L1
ALDH1L2
ALDH2
ALDH3A1
ALDH3A2
ALDH3B1
ALDH3B2
ALDH4A1
ALDH5A1
ALDH7A1
ALDH8A1
ALDH9A1
ALDOA
ALDOB
ALDOC
ALG1
ALG10
ALG10B
ALG11
ALG12
ALG13
ALG1L
ALG1L2
ALG2
ALG3
ALG5
ALG6
ALG8
ALK
ALKAL1
ALKAL2
ALKBH1
ALKBH2
ALKBH3
ALKBH4
ALKBH5
ALKBH6
ALKBH7
ALKBH8
ALLC
ALMS1
ALOX12
ALOX12B
ALOX15
ALOX15B
ALOX5
ALOX5AP
ALOXE3
ALPG
ALPI
ALPK1
ALPK2
ALPK3
ALPL
ALPP
ALS2
ALS2CL
ALX1
ALX3
ALX4
ALYREF
AMACR
AMBN
AMBP
AMBRA1
AMD1
AMDHD1
AMDHD2
AMELX
AMELY
AMER1
AMER2
AMER3
AMFR
AMHR2
AMIGO1
AMIGO2
AMIGO3
AMMECR1L
AMN1
AMOT
AMOTL1
AMPD1
AMPD3
AMPH
AMY1A
AMY1B
AMY2A
AMY2B
AMZ1
AMZ2
ANAPC1
ANAPC11
ANAPC13
ANAPC15
ANAPC16
ANAPC4
ANAPC5
ANAPC7
ANG
ANGEL1
ANGEL2
ANGPT1
ANGPT2
ANGPT4
ANGPTL1
ANGPTL2
ANGPTL3
ANGPTL4
ANGPTL5
ANGPTL6
ANGPTL7
ANGPTL8
ANHX
ANK1
ANK2
ANK3
ANKAR
ANKDD1A
ANKFN1
ANKFY1
ANKH
ANKHD1-EIF4EBP3
ANKIB1
ANKK1
ANKLE2
ANKMY1
ANKMY2
ANKRA2
ANKRD1
ANKRD10
ANKRD11
ANKRD12
ANKRD13A
ANKRD13B
ANKRD13C
ANKRD13D
ANKRD16
ANKRD17
ANKRD18A
ANKRD2
ANKRD20A3
ANKRD20A4
ANKRD22
ANKRD23
ANKRD24
ANKRD26
ANKRD27
ANKRD28
ANKRD29
ANKRD30A
ANKRD30B
ANKRD30BL
ANKRD31
ANKRD33
ANKRD33B
ANKRD34A
ANKRD34B
ANKRD34C
ANKRD35
ANKRD36
ANKRD36B
ANKRD36C
ANKRD37
ANKRD40
ANKRD40CL
ANKRD42
ANKRD44
ANKRD45
ANKRD46
ANKRD49
ANKRD50
ANKRD52
ANKRD53
ANKRD54
ANKRD55
ANKRD6
ANKRD60
ANKRD61
ANKRD62
ANKRD63
ANKRD66
ANKRD7
ANKRD9
ANKS1A
ANKS1B
ANKS4B
ANKS6
ANKUB1
ANKZF1
ANLN
ANO1
ANO10
ANO2
ANO3
ANO4
ANO5
ANO6
ANO7
ANO8
ANO9
ANOS1
ANP32A
ANP32B
ANP32C
ANP32D
ANP32E
ANPEP
ANTXR1
ANXA1
ANXA10
ANXA11
ANXA13
ANXA2
ANXA2R
ANXA3
ANXA4
ANXA5
ANXA6
ANXA7
ANXA8L1
ANXA9
AOAH
AOC1
AOC2
AOC3
AOPEP
AOX1
AP1B1
AP1G1
AP1G2
AP1M2
AP1S1
AP1S3
AP2A1
AP2A2
AP2B1
AP2M1
AP3B1
AP3B2
AP3D1
AP3M1
AP3M2
AP3S2
AP4B1
AP4E1
AP4M1
AP5B1
AP5M1
AP5S1
APAF1
APBA1
APBA2
APBA3
APBB1
APBB1IP
APBB2
APBB3
APC
APC2
APCDD1
APCDD1L
APCS
APELA
APEX1
APEX2
APH1A
APH1B
API5
APIP
APLF
APLN
APLNR
APLP1
APLP2
APMAP
APOA1
APOA2
APOA4
APOB
APOBEC1
APOBEC2
APOBEC3A
APOBEC3A_B
APOBEC3B
APOBEC3C
APOBEC3D
APOBEC3F
APOBEC3G
APOBEC3H
APOBEC4
APOBR
APOC3
APOE
APOF
APOH
APOL2
APOL3
APOL5
APOL6
APOM
APOOL
APP
APPBP2
APPL1
APPL2
APRT
APTX
AQP1
AQP10
AQP11
AQP12A
AQP12B
AQP2
AQP3
AQP5
AQP6
AQP8
AQR
AR
ARAF
ARAP1
ARAP2
ARAP3
ARCN1
AREG
AREL1
ARF1
ARF3
ARF5
ARF6
ARFGAP1
ARFGAP2
ARFGAP3
ARFGEF1
ARFGEF2
ARFGEF3
ARFIP1
ARFIP2
ARFRP1
ARG1
ARG2
ARGLU1
ARHGAP1
ARHGAP10
ARHGAP11A
ARHGAP12
ARHGAP15
ARHGAP17
ARHGAP18
ARHGAP19
ARHGAP20
ARHGAP21
ARHGAP22
ARHGAP23
ARHGAP24
ARHGAP25
ARHGAP26
ARHGAP27
ARHGAP28
ARHGAP29
ARHGAP30
ARHGAP31
ARHGAP32
ARHGAP33
ARHGAP35
ARHGAP36
ARHGAP39
ARHGAP4
ARHGAP40
ARHGAP42
ARHGAP44
ARHGAP45
ARHGAP5
ARHGAP6
ARHGAP8
ARHGAP9
ARHGDIA
ARHGDIB
ARHGDIG
ARHGEF1
ARHGEF10
ARHGEF10L
ARHGEF11
ARHGEF12
ARHGEF15
ARHGEF16
ARHGEF17
ARHGEF18
ARHGEF19
ARHGEF2
ARHGEF25
ARHGEF26
ARHGEF28
ARHGEF3
ARHGEF33
ARHGEF38
ARHGEF39
ARHGEF4
ARHGEF40
ARHGEF5
ARHGEF6
ARHGEF7
ARHGEF9
ARID2
ARID3A
ARID3B
ARID3C
ARID4A
ARID4B
ARID5A
ARID5B
ARIH1
ARIH2
ARIH2OS
ARL1
ARL11
ARL13A
ARL13B
ARL14
ARL14EPL
ARL15
ARL17A
ARL17B
ARL2
ARL2BP
ARL3
ARL4A
ARL4C
ARL4D
ARL5B
ARL5C
ARL6IP5
ARL6IP6
ARL8A
ARMC1
ARMC10
ARMC12
ARMC2
ARMC3
ARMC4
ARMC5
ARMC6
ARMC7
ARMC8
ARMC9
ARMCX1
ARMCX2
ARMCX3
ARMCX4
ARMCX5
ARMCX5-GPRASP2
ARMCX6
ARMH1
ARMH2
ARMH3
ARMH4
ARMS2
ARMT1
ARNT
ARNT2
ARNTL
ARPC1A
ARPC1B
ARPC2
ARPC3
ARPC4-TTLL3
ARPC5
ARPC5L
ARPIN
ARPIN-AP3S2
ARPP19
ARPP21
ARR3
ARRB1
ARRDC1
ARRDC2
ARRDC3
ARRDC4
ARRDC5
ARSB
ARSD
ARSE
ARSF
ARSG
ARSH
ARSJ
ARSK
ART1
ART5
ARTN
ARV1
ARVCF
AS3MT
ASAH2
ASAP1
ASAP2
ASAP3
ASB1
ASB10
ASB12
ASB13
ASB14
ASB15
ASB16
ASB17
ASB18
ASB2
ASB3
ASB4
ASB5
ASB6
ASB7
ASB9
ASCC1
ASCC2
ASCC3
ASCL2
ASCL4
ASCL5
ASDURF
ASF1A
ASF1B
ASGR1
ASGR2
ASH1L
ASH2L
ASIC1
ASIC2
ASIC3
ASIC4
ASIC5
ASIP
ASL
ASMT
ASMTL
ASNS
ASNSD1
ASPA
ASPG
ASPH
ASPHD1
ASPHD2
ASPM
ASPN
ASPRV1
ASPSCR1
ASS1
ASTE1
ASTL
ASTN1
ASTN2
ASXL1
ASXL2
ASXL3
ASZ1
ATAD1
ATAD2
ATAD2B
ATAD3A
ATAD3B
ATAD3C
ATAD5
ATAT1
ATCAY
ATF1
ATF2
ATF3
ATF4
ATF5
ATF6
ATF6B
ATF7IP
ATF7IP2
ATF7-NPFF
ATG10
ATG101
ATG12
ATG13
ATG14
ATG16L1
ATG16L2
ATG2A
ATG2B
ATG3
ATG4A
ATG4B
ATG4C
ATG4D
ATG5
ATG7
ATG9A
ATIC
ATL1
ATL2
ATL3
ATMIN
ATN1
ATOH1
ATOH8
ATOX1
ATP10A
ATP10B
ATP10D
ATP11A
ATP11B
ATP11C
ATP12A
ATP13A1
ATP13A2
ATP13A3
ATP13A4
ATP13A5
ATP1A1
ATP1A2
ATP1A3
ATP1A4
ATP1B1
ATP1B3
ATP1B4
ATP23
ATP2A1
ATP2A2
ATP2A3
ATP2B1
ATP2B2
ATP2B3
ATP2B4
ATP2C1
ATP2C2
ATP4A
ATP4B
ATP5F1A
ATP5F1B
ATP5F1C
ATP5F1D
ATP5F1E
ATP5IF1
ATP5MC1
ATP5MC2
ATP5MC3
ATP5MD
ATP5ME
ATP5MF
ATP5MF-PTCD1
ATP5MG
ATP5MGL
ATP5MPL
ATP5PB
ATP5PD
ATP5PF
ATP5PO
ATP6
ATP6
ATP6
ATP6AP1
ATP6V0A1
ATP6V0A2
ATP6V0A4
ATP6V0B
ATP6V0D1
ATP6V0D2
ATP6V0E1
ATP6V0E2
ATP6V1A
ATP6V1B1
ATP6V1B2
ATP6V1C1
ATP6V1C2
ATP6V1D
ATP6V1E1
ATP6V1E2
ATP6V1F
ATP6V1FNB
ATP6V1G3
ATP6V1H
ATP7A
ATP7B
ATP8
ATP8
ATP8
ATP8A1
ATP8A2
ATP8B1
ATP8B2
ATP8B3
ATP8B4
ATP9A
ATP9B
ATPAF1
ATPAF2
ATPSCKMT
ATR
ATRAID
ATRIP
ATRN
ATRNL1
ATRX
ATXN1
ATXN10
ATXN2
ATXN2L
ATXN3
ATXN3L
ATXN7
ATXN7L1
ATXN7L2
ATXN7L3
ATXN8
AUNIP
AUP1
AURKA
AURKAIP1
AURKB
AURKC
AUTS2
AVIL
AVL9
AVP
AVPI1
AVPR1B
AVPR2
AWAT1
AWAT2
AXDND1
AXIN1
AXIN2
AXL
AZGP1
AZI2
AZIN1
AZU1
B2M
B3GALNT1
B3GALNT2
B3GALT2
B3GALT4
B3GALT5
B3GALT6
B3GAT1
B3GLCT
B3GNT2
B3GNT3
B3GNT4
B3GNT5
B3GNT7
B3GNT8
B3GNT9
B3GNTL1
B4GALNT2
B4GALNT3
B4GALNT4
B4GALT1
B4GALT3
B4GALT4
B4GALT5
B4GALT6
B4GALT7
B4GAT1
B9D1
BAAT
BABAM1
BABAM2
BACE1
BACE2
BACH1
BACH2
BAD
BAG1
BAG2
BAG3
BAG4
BAG5
BAG6
BAGE
BAGE2
BAGE3
BAGE4
BAGE5
BAHCC1
BAHD1
BAIAP2
BAIAP2L1
BAIAP2L2
BAIAP3
BAK1
BAMBI
BANF1
BANF2
BANK1
BANP
BARHL2
BARX1
BARX2
BATF2
BATF3
BAX
BAZ1A
BAZ1B
BAZ2A
BAZ2B
BBC3
BBIP1
BBOF1
BBOX1
BBS1
BBS10
BBS2
BBS4
BBS5
BBS7
BBS9
BBX
BCAM
BCAN
BCAP29
BCAP31
BCAR1
BCAR3
BCAS1
BCAS2
BCAS3
BCAT1
BCAT2
BCCIP
BCDIN3D
BCHE
BCKDHA
BCKDHB
BCKDK
BCL10
BCL11A
BCL11B
BCL2
BCL2A1
BCL2L1
BCL2L10
BCL2L11
BCL2L12
BCL2L13
BCL2L14
BCL2L2
BCL2L2-PABPN1
BCL3
BCL6
BCL6B
BCL7A
BCL9
BCL9L
BCLAF1
BCLAF3
BCO1
BCO2
BCOR
BCORL1
BCR
BCS1L
BDH1
BDH2
BDKRB1
BDKRB2
BDNF
BDP1
BEAN1
BECN1
BECN2
BEGAIN
BEND2
BEND3
BEND4
BEND5
BEND6
BEND7
BEST1
BEST2
BEST3
BET1
BEX1
BEX2
BEX3
BEX4
BEX5
BFAR
BFSP1
BFSP2
BGLAP
BGN
BHLHA15
BHLHA9
BHLHB9
BHLHE22
BHLHE23
BHLHE40
BHLHE41
BHMG1
BHMT
BHMT2
BICC1
BICD1
BICD2
BICDL1
BICDL2
BICRA
BICRAL
BID
BIK
BIN1
BIN2
BIN3
BIRC2
BIRC3
BIRC5
BIRC6
BIRC7
BIVM-ERCC5
BLCAP
BLID
BLK
BLM
BLMH
BLNK
BLOC1S1
BLOC1S2
BLOC1S3
BLOC1S4
BLOC1S6
BLVRA
BLZF1
BMF
BMI1
BMP1
BMP10
BMP15
BMP2
BMP2K
BMP3
BMP4
BMP5
BMP6
BMP7
BMPER
BMPR1A
BMPR1B
BMPR2
BMS1
BMT2
BMX
BNC1
BNC2
BNIP2
BNIP3
BNIP3L
BNIPL
BOC
BOD1
BOD1L1
BOK
BOLA1
BOLA2
BOLA2B
BOLA2-SMG1P6
BOLL
BOP1
BORA
BORCS5
BORCS6
BORCS7
BORCS8
BORCS8-MEF2B
BPGM
BPHL
BPIFA2
BPIFA3
BPIFB1
BPIFB2
BPIFB3
BPIFB4
BPIFB6
BPIFC
BPTF
BPY2
BPY2B
BPY2C
BRAF
BRAP
BRCC3
BRD1
BRD2
BRD3
BRD3OS
BRD4
BRD7
BRD8
BRD9
BRDT
BRF1
BRF2
BRICD5
BRINP1
BRINP2
BRINP3
BRIX1
BRMS1
BRMS1L
BROX
BRPF1
BRPF3
BRS3
BRSK1
BRSK2
BRWD1
BRWD3
BSCL2
BSDC1
BSG
BSN
BSND
BSPH1
BSPRY
BST1
BST2
BSX
BTAF1
BTBD1
BTBD10
BTBD11
BTBD16
BTBD17
BTBD18
BTBD19
BTBD2
BTBD3
BTBD6
BTBD7
BTBD8
BTBD9
BTC
BTD
BTF3
BTG1
BTG2
BTG3
BTK
BTLA
BTN1A1
BTN2A1
BTN2A2
BTN3A1
BTN3A2
BTN3A3
BTNL10
BTNL2
BTNL3
BTNL8
BTNL9
BTRC
BUB1
BUB1B
BUB1B-PAK6
BUB3
BUD13
BUD23
BVES
BYSL
BZW1
BZW2
C10orf105
C10orf111
C10orf113
C10orf120
C10orf126
C10orf142
C10orf143
C10orf25
C10orf53
C10orf62
C10orf67
C10orf71
C10orf82
C10orf88
C10orf90
C10orf95
C10orf99
C11orf1
C11orf16
C11orf21
C11orf24
C11orf40
C11orf42
C11orf44
C11orf45
C11orf49
C11orf52
C11orf53
C11orf58
C11orf65
C11orf68
C11orf71
C11orf74
C11orf86
C11orf91
C11orf94
C11orf95
C11orf96
C11orf97
C11orf98
C12orf10
C12orf29
C12orf4
C12orf40
C12orf43
C12orf49
C12orf50
C12orf54
C12orf56
C12orf60
C12orf66
C12orf71
C12orf73
C12orf74
C12orf75
C12orf76
C12orf80
C12orf81
C13orf42
C13orf46
C14orf119
C14orf132
C14orf177
C14orf180
C14orf28
C14orf39
C14orf93
C15orf39
C15orf40
C15orf41
C15orf48
C15orf53
C15orf56
C15orf65
C16orf45
C16orf47
C16orf54
C16orf58
C16orf70
C16orf71
C16orf72
C16orf74
C16orf78
C16orf82
C16orf86
C16orf87
C16orf89
C16orf91
C16orf92
C16orf95
C16orf96
C16orf97
C17orf100
C17orf102
C17orf112
C17orf113
C17orf47
C17orf49
C17orf50
C17orf51
C17orf53
C17orf64
C17orf67
C17orf75
C17orf77
C17orf78
C17orf80
C17orf82
C17orf97
C17orf98
C17orf99
C18orf12
C18orf21
C18orf25
C18orf32
C18orf54
C18orf63
C18orf65
C19orf12
C19orf18
C19orf25
C19orf44
C19orf47
C19orf53
C19orf54
C19orf57
C19orf66
C19orf67
C19orf73
C19orf81
C19orf84
C19orf85
C1D
C1GALT1
C1GALT1C1
C1GALT1C1L
C1orf100
C1orf105
C1orf109
C1orf112
C1orf116
C1orf122
C1orf127
C1orf134
C1orf141
C1orf146
C1orf147
C1orf158
C1orf159
C1orf162
C1orf167
C1orf174
C1orf185
C1orf195
C1orf196
C1orf198
C1orf21
C1orf226
C1orf229
C1orf232
C1orf35
C1orf43
C1orf50
C1orf52
C1orf53
C1orf61
C1orf74
C1orf87
C1orf94
C1QA
C1QBP
C1QC
C1QL2
C1QL3
C1QL4
C1QTNF1
C1QTNF12
C1QTNF2
C1QTNF3
C1QTNF4
C1QTNF7
C1QTNF8
C1QTNF9
C1QTNF9B
C1R
C1RL
C1S
C20orf144
C20orf173
C20orf194
C20orf202
C20orf204
C20orf27
C20orf85
C20orf96
C21orf58
C21orf59-TCP10L
C21orf91
C22orf15
C22orf23
C22orf24
C22orf39
C22orf42
C22orf46
C2CD2
C2CD2L
C2CD3
C2CD4A
C2CD4B
C2CD4C
C2CD4D
C2CD5
C2CD6
C2orf15
C2orf16
C2orf27A
C2orf27B
C2orf40
C2orf42
C2orf48
C2orf49
C2orf66
C2orf68
C2orf69
C2orf73
C2orf74
C2orf76
C2orf78
C2orf81
C2orf83
C2orf88
C2orf91
C2orf92
C3
C3AR1
C3orf18
C3orf20
C3orf22
C3orf33
C3orf35
C3orf36
C3orf38
C3orf49
C3orf52
C3orf56
C3orf67
C3orf70
C3orf79
C3orf80
C3orf85
C3orf86
C4B
C4B_2
C4BPA
C4BPB
C4orf17
C4orf19
C4orf3
C4orf36
C4orf46
C4orf47
C4orf48
C4orf50
C4orf51
C4orf54
C5
C5AR1
C5AR2
C5orf15
C5orf22
C5orf30
C5orf34
C5orf47
C5orf51
C5orf52
C5orf58
C5orf60
C5orf64
C5orf66
C5orf67
C6
C6orf106
C6orf118
C6orf120
C6orf132
C6orf136
C6orf141
C6orf15
C6orf163
C6orf201
C6orf222
C6orf223
C6orf48
C6orf52
C6orf58
C6orf62
C6orf89
C6orf99
C7
C7orf25
C7orf26
C7orf31
C7orf57
C7orf61
C7orf69
C7orf77
C8A
C8B
C8orf17
C8orf33
C8orf34
C8orf44
C8orf44-SGK3
C8orf48
C8orf49
C8orf58
C8orf74
C8orf76
C8orf82
C8orf86
C8orf87
C8orf88
C8orf89
C9
C9orf116
C9orf118
C9orf129
C9orf131
C9orf135
C9orf139
C9orf147
C9orf152
C9orf163
C9orf24
C9orf40
C9orf43
C9orf50
C9orf57
C9orf64
C9orf66
C9orf72
C9orf78
C9orf85
C9orf92
CA1
CA10
CA11
CA12
CA13
CA14
CA2
CA4
CA5A
CA9
CAB39
CAB39L
CABCOCO1
CABIN1
CABLES1
CABLES2
CABP2
CABP5
CABP7
CABS1
CABYR
CACFD1
CACHD1
CACNA1A
CACNA1B
CACNA1C
CACNA1D
CACNA1E
CACNA1F
CACNA1G
CACNA1H
CACNA1I
CACNA1S
CACNA2D1
CACNA2D2
CACNA2D3
CACNA2D4
CACNB1
CACNB2
CACNB3
CACNB4
CACNG1
CACNG3
CACNG4
CACNG5
CACNG7
CACNG8
CACTIN
CACUL1
CACYBP
CAD
CADM1
CADM2
CADM3
CADM4
CADPS
CADPS2
CAGE1
CALB1
CALCA
CALCB
CALCOCO1
CALCOCO2
CALCR
CALCRL
CALD1
CALHM1
CALHM2
CALHM4
CALHM5
CALHM6
CALM1
CALM2
CALM3
CALML3
CALML4
CALML6
CALN1
CALR
CALR3
CALU
CALY
CAMK1
CAMK1G
CAMK2A
CAMK2B
CAMK2D
CAMK2G
CAMK2N1
CAMK4
CAMKK1
CAMKK2
CAMKMT
CAMKV
CAMP
CAMSAP1
CAMSAP2
CAMSAP3
CAMTA1
CAMTA2
[truncated: 16,024 more rows]

## Sheet: Table S10
EARN: an ensemble machine learning algorithm to predict driver genes in metastatic breast cancer
Leila Mirsadeghi1, Reza Haji Hosseini1*, Ali Mohammad Banaei-Moghaddam2, Kaveh Kavousi3*
* Correspondence: kkavousi@ut.ac.ir; hosseini@pnu.ac.ir;
1Department of Biology, Faculty of Science, Payame Noor University, Tehran, Iran
2 Laboratory of Genomics and Epigenomics (LGE), Department of Biochemistry, Institute of Biochemistry and Biophysics (IBB), University of Tehran, Tehran, Iran
3 Laboratory of Complex Biological Systems and Bioinformatics (CBB), Department of Bioinformatics, Institute of Biochemistry and Biophysics (IBB), University of Tehran, Tehran, Iran
Additional file 4: Table S10 16698 genes as genome-wide screening data for MBCA after excluding positive and negative training sets
A1BG
A1CF
A2M
A2ML1
A4GALT
A4GNT
AAAS
AADAC
AADACL2
AADACL3
AADACL4
AAGAB
AAK1
AAMP
AANAT
AARD
AARS
AARS2
AARSD1
AASDH
AASDHPPT
AASS
AATF
AATK
ABAT
ABCA1
ABCA10
ABCA12
ABCA13
ABCA2
ABCA3
ABCA4
ABCA5
ABCA6
ABCA7
ABCA8
ABCA9
ABCB1
ABCB10
ABCB11
ABCB4
ABCB5
ABCB6
ABCB7
ABCB8
ABCB9
ABCC1
ABCC10
ABCC11
ABCC12
ABCC2
ABCC3
ABCC4
ABCC5
ABCC6
ABCC8
ABCC9
ABCD1
ABCD2
ABCD3
ABCD4
ABCE1
ABCF1
ABCF2
ABCF3
ABCG1
ABCG2
ABCG4
ABCG5
ABCG8
ABHD1
ABHD10
ABHD11
ABHD12
ABHD12B
ABHD14B
ABHD15
ABHD16A
ABHD16B
ABHD18
ABHD2
ABHD4
ABHD6
ABHD8
ABI1
ABI2
ABI3
ABI3BP
ABITRAM
ABL1
ABL2
ABLIM1
ABLIM2
ABLIM3
ABO
ABR
ABRA
ABRACL
ABRAXAS1
ABRAXAS2
ABTB1
ABTB2
ACAA1
ACACA
ACACB
ACAD10
ACAD11
ACADL
ACADS
ACADSB
ACADVL
ACAN
ACAP1
ACAP2
ACAP3
ACAT1
ACAT2
ACBD3
ACBD4
ACBD5
ACBD6
ACCS
ACCSL
ACD
ACE
ACE2
ACER2
ACER3
ACHE
ACIN1
ACKR1
ACKR2
ACKR3
ACKR4
ACLY
ACMSD
ACO1
ACO2
ACOD1
ACOT1
ACOT11
ACOT13
ACOT2
ACOT4
ACOT6
ACOT7
ACOT8
ACOT9
ACOX1
ACOX3
ACOXL
ACP2
ACP4
ACP5
ACP7
ACPP
ACR
ACRBP
ACRV1
ACSBG1
ACSBG2
ACSF2
ACSL1
ACSL3
ACSL4
ACSL5
ACSL6
ACSM1
ACSM2A
ACSM5
ACSM6
ACSS1
ACSS3
ACTA1
ACTA2
ACTB
ACTBL2
ACTC1
ACTG1
ACTG2
ACTL6A
ACTL6B
ACTL7A
ACTL7B
ACTL8
ACTL9
ACTN2
ACTN3
ACTN4
ACTR10
ACTR1B
ACTR2
ACTR3
ACTR3C
ACTR5
ACTR6
ACTR8
ACTRT1
ACTRT3
ACVR1
ACVR1B
ACVR1C
ACVR2A
ACVR2B
ACY3
ACYP1
ACYP2
ADA
ADA2
ADAD1
ADAD2
ADAM10
ADAM11
ADAM12
ADAM15
ADAM17
ADAM19
ADAM2
ADAM20
ADAM21
ADAM22
ADAM23
ADAM28
ADAM29
ADAM30
ADAM32
ADAM7
ADAM8
ADAM9
ADAMDEC1
ADAMTS1
ADAMTS10
ADAMTS12
ADAMTS13
ADAMTS14
ADAMTS15
ADAMTS16
ADAMTS17
ADAMTS18
ADAMTS19
ADAMTS2
ADAMTS20
ADAMTS3
ADAMTS4
ADAMTS5
ADAMTS6
ADAMTS7
ADAMTS9
ADAMTSL1
ADAMTSL2
ADAMTSL3
ADAMTSL4
ADAMTSL5
ADAP2
ADAR
ADARB1
ADARB2
ADAT2
ADAT3
ADCK1
ADCK2
ADCK5
ADCY1
ADCY10
ADCY2
ADCY3
ADCY4
ADCY5
ADCY6
ADCY7
ADCY8
ADCY9
ADCYAP1
ADCYAP1R1
ADD1
ADD2
ADD3
ADGB
ADGRA1
ADGRA2
ADGRA3
ADGRB1
ADGRB2
ADGRB3
ADGRD1
ADGRD2
ADGRE1
ADGRE2
ADGRE3
ADGRE5
ADGRF1
ADGRF2
ADGRF3
ADGRF4
ADGRF5
ADGRG1
ADGRG2
ADGRG3
ADGRG4
ADGRG5
ADGRG6
ADGRG7
ADGRL1
ADGRL2
ADGRL3
ADGRL4
ADGRV1
ADH1A
ADH1B
ADH1C
ADH4
ADH5
ADH7
ADHFE1
ADIG
ADIPOQ
ADIPOR1
ADIRF
ADK
ADM
ADM2
ADNP
ADNP2
ADO
ADORA1
ADORA2A
ADORA2B
ADPRH
ADPRHL1
ADPRHL2
ADPRM
ADRA1A
ADRA1B
ADRA1D
ADRA2A
ADRA2B
ADRA2C
ADRB1
ADRB2
ADRM1
ADSL
ADSS
AEBP1
AEBP2
AEN
AFAP1
AFAP1L1
AFAP1L2
AFDN
AFF1
AFF2
AFF3
AFF4
AFG1L
AFG3L2
AFM
AFMID
AFP
AFTPH
AGAP1
AGAP11
AGAP2
AGAP4
AGAP5
AGAP9
AGBL1
AGBL2
AGBL3
AGBL4
AGBL5
AGER
AGFG1
AGFG2
AGGF1
AGK
AGL
AGMO
AGO1
AGO2
AGO4
AGPAT1
AGPAT2
AGPAT5
AGPS
AGR2
AGR3
AGRN
AGT
AGTPBP1
AGTR1
AGTR2
AGTRAP
AGXT
AGXT2
AHCTF1
AHCY
AHCYL1
AHCYL2
AHDC1
AHI1
AHNAK
AHNAK2
AHR
AHRR
AHSG
AHSP
AIDA
AIF1
AIF1L
AIFM1
AIFM3
AIM2
AIP
AIPL1
AIRE
AJAP1
AJM1
AJUBA
AK1
AK2
AK6
AK7
AK8
AK9
AKAIN1
AKAP1
AKAP10
AKAP11
AKAP12
AKAP13
AKAP17A
AKAP3
AKAP4
AKAP5
AKAP6
AKAP7
AKAP8
AKAP8L
AKAP9
AKIP1
AKIRIN2
AKNA
AKNAD1
AKR1A1
AKR1B10
AKR1B15
AKR1C1
AKR1C2
AKR1C3
AKR1D1
AKR1E2
AKR7L
AKTIP
ALAD
ALB
ALCAM
ALDH18A1
ALDH1A1
ALDH1A3
ALDH1B1
ALDH1L1
ALDH1L2
ALDH2
ALDH3A1
ALDH4A1
ALDH5A1
ALDH6A1
ALDH7A1
ALDH8A1
ALDH9A1
ALDOA
ALDOB
ALG1
ALG10
ALG10B
ALG11
ALG12
ALG13
ALG1L
ALG1L2
ALG2
ALG5
ALG6
ALG8
ALG9
ALK
ALKAL1
ALKAL2
ALKBH2
ALKBH3
ALKBH5
ALKBH6
ALKBH7
ALLC
ALMS1
ALOX12
ALOX12B
ALOX15
ALOX15B
ALOX5
ALOX5AP
ALOXE3
ALPG
ALPI
ALPK1
ALPK2
ALPK3
ALPL
ALPP
ALS2
ALS2CL
ALS2CR12
ALX1
ALX3
ALX4
ALYREF
AMACR
AMBN
AMBP
AMBRA1
AMD1
AMDHD1
AMELY
AMER1
AMER3
AMFR
AMH
AMHR2
AMIGO2
AMIGO3
AMMECR1
AMMECR1L
AMN
AMOT
AMOTL1
AMOTL2
AMPD1
AMPD2
AMPD3
AMPH
AMT
AMTN
AMY1B
AMY1C
AMY2A
AMY2B
AMZ1
AMZ2
ANAPC11
ANAPC13
ANAPC15
ANAPC2
ANAPC4
ANAPC5
ANAPC7
ANG
ANGEL1
ANGEL2
ANGPT1
ANGPT2
ANGPT4
ANGPTL1
ANGPTL2
ANGPTL4
ANGPTL6
ANGPTL7
ANGPTL8
ANHX
ANK1
ANK2
ANK3
ANKAR
ANKDD1A
ANKDD1B
ANKEF1
ANKFY1
ANKH
ANKHD1
ANKHD1-EIF4EBP3
ANKIB1
ANKK1
ANKLE2
ANKMY1
ANKRD10
ANKRD11
ANKRD12
ANKRD13B
ANKRD16
ANKRD17
ANKRD18A
ANKRD18B
ANKRD20A1
ANKRD20A2
ANKRD20A3
ANKRD20A4
ANKRD22
ANKRD24
ANKRD26
ANKRD27
ANKRD28
ANKRD29
ANKRD30A
ANKRD30B
ANKRD31
ANKRD34B
ANKRD34C
ANKRD35
ANKRD36
ANKRD36B
ANKRD37
ANKRD39
ANKRD40
ANKRD40CL
ANKRD44
ANKRD45
ANKRD46
ANKRD49
ANKRD50
ANKRD52
ANKRD54
ANKRD55
ANKRD6
ANKRD60
ANKRD61
ANKRD62
ANKRD63
ANKRD65
ANKRD66
ANKRD7
ANKRD9
ANKS1A
ANKS1B
ANKS3
ANKS4B
ANKS6
ANKUB1
ANKZF1
ANLN
ANO1
ANO10
ANO2
ANO3
ANO4
ANO5
ANO6
ANO7
ANO8
ANO9
ANOS1
ANP32A
ANP32B
ANP32C
ANP32D
ANPEP
ANTXR1
ANTXR2
ANTXRL
ANXA1
ANXA10
ANXA11
ANXA2
ANXA2R
ANXA3
ANXA4
ANXA7
ANXA8
ANXA8L1
ANXA9
AOAH
AOC1
AOC2
AOC3
AOPEP
AOX1
AP1B1
AP1G1
AP1G2
AP1M1
AP1M2
AP1S1
AP1S2
AP1S3
AP2A1
AP2A2
AP2B1
AP2M1
AP3B1
AP3B2
AP3D1
AP3M2
AP3S2
AP4E1
AP4M1
AP5B1
AP5M1
AP5Z1
APAF1
APBA1
APBA2
APBB1
APBB1IP
APBB2
APC
APC2
APCDD1
APCS
APEH
APELA
APEX1
APEX2
APH1A
APH1B
API5
APIP
APLF
APLNR
APLP1
APLP2
APMAP
APOA1
APOA4
APOA5
APOB
APOBEC1
APOBEC2
APOBEC3A
APOBEC3A_B
APOBEC3B
APOBEC3C
APOBEC3F
APOBEC3G
APOBEC3H
APOBR
APOC1
APOC2
APOC3
APOC4
APOD
APOE
APOF
APOH
APOL2
APOL4
APOL5
APOL6
APOM
APOO
APOPT1
APP
APPBP2
APPL1
APPL2
APRT
APTX
AQP1
AQP11
AQP12A
AQP12B
AQP2
AQP3
AQP5
AQP6
AQP7
AQP8
AQP9
AQR
AR
ARAF
ARAP1
ARAP2
ARAP3
ARC
ARCN1
AREG
AREL1
ARF1
ARF4
ARF5
ARF6
ARFGAP1
ARFGAP2
ARFGEF1
ARFGEF2
ARFGEF3
ARFIP1
ARFIP2
ARFRP1
ARG1
ARGFX
ARGLU1
ARHGAP1
ARHGAP10
ARHGAP11A
ARHGAP11B
ARHGAP12
ARHGAP17
ARHGAP18
ARHGAP19
ARHGAP20
ARHGAP21
ARHGAP22
ARHGAP23
ARHGAP25
ARHGAP26
ARHGAP27
ARHGAP28
ARHGAP29
ARHGAP30
ARHGAP31
ARHGAP32
ARHGAP33
ARHGAP35
ARHGAP36
ARHGAP39
ARHGAP4
ARHGAP40
ARHGAP42
ARHGAP44
ARHGAP45
ARHGAP5
ARHGAP6
ARHGAP9
ARHGDIA
ARHGDIB
ARHGDIG
ARHGEF1
ARHGEF10
ARHGEF10L
ARHGEF11
ARHGEF12
ARHGEF17
ARHGEF18
ARHGEF19
ARHGEF2
ARHGEF25
ARHGEF26
ARHGEF28
ARHGEF3
ARHGEF33
ARHGEF35
ARHGEF37
ARHGEF38
ARHGEF39
ARHGEF40
ARHGEF5
ARHGEF6
ARHGEF7
ARHGEF9
ARID1A
ARID1B
ARID2
ARID3A
ARID3B
ARID3C
ARID4A
ARID4B
ARID5A
ARID5B
ARIH1
ARIH2
ARIH2OS
ARL1
ARL10
ARL11
ARL13A
ARL13B
ARL14
ARL14EP
ARL14EPL
ARL15
ARL17A
ARL17B
ARL2
ARL2BP
ARL3
ARL4A
ARL4C
ARL4D
ARL5A
ARL5B
ARL5C
ARL6
ARL6IP1
ARL6IP5
ARL6IP6
ARL8A
ARL8B
ARL9
ARMC10
ARMC12
ARMC2
ARMC3
ARMC4
ARMC5
ARMC6
ARMC8
ARMC9
ARMCX1
ARMCX2
ARMCX4
ARMCX5-GPRASP2
ARMCX6
ARMH1
ARMH2
ARMH3
ARMH4
ARMS2
ARMT1
ARNT
ARNT2
ARNTL
ARNTL2
ARPC1A
ARPC1B
ARPC2
ARPC4
ARPC5
ARPC5L
ARPIN
ARPIN-AP3S2
ARPP21
ARRB1
ARRDC1
ARRDC2
ARRDC3
ARRDC4
ARRDC5
ARSA
ARSB
ARSD
ARSE
ARSF
ARSG
ARSH
ARSI
ARSJ
ARSK
ART4
ART5
ARTN
ARVCF
ARX
AS3MT
ASAH2B
ASAP1
ASAP2
ASAP3
ASB10
ASB11
ASB12
ASB15
ASB2
ASB3
ASB5
ASB7
ASB8
ASB9
ASCC1
ASCC3
ASCL1
ASCL2
ASCL5
ASDURF
ASF1A
ASF1B
ASGR2
ASH1L
ASH2L
ASIC2
ASIC3
ASIC5
ASL
ASMT
ASNA1
ASNS
ASPDH
ASPG
ASPH
ASPHD1
ASPHD2
ASPM
ASPN
ASPRV1
ASPSCR1
ASRGL1
ASS1
ASTE1
ASTN1
ASTN2
ASXL1
ASXL2
ASXL3
ATAD2
ATAD2B
ATAD3A
ATAD3C
ATAD5
ATCAY
ATF1
ATF2
ATF3
ATF4
ATF5
ATF6
ATF6B
ATF7
ATF7IP
ATF7IP2
ATF7-NPFF
ATG10
ATG12
ATG13
ATG16L1
ATG16L2
ATG2A
ATG2B
ATG4A
ATG4B
ATG4C
ATG4D
ATG5
ATG7
ATG9A
ATIC
ATL1
ATL2
ATL3
ATM
ATMIN
ATN1
ATOH7
ATOH8
ATOX1
ATP10A
ATP10B
ATP10D
ATP11A
ATP11AUN
ATP11B
ATP11C
ATP12A
ATP13A1
ATP13A2
ATP13A3
ATP13A4
ATP13A5
ATP1A1
ATP1A2
ATP1A3
ATP1A4
ATP1B2
ATP1B3
ATP1B4
ATP23
ATP2A1
ATP2A2
ATP2A3
ATP2B1
ATP2B2
ATP2B3
ATP2B4
ATP2C1
ATP2C2
ATP4A
ATP4B
ATP5F1A
ATP5F1B
ATP5F1C
ATP5F1D
ATP5F1E
ATP5IF1
ATP5MC1
ATP5MC2
ATP5MC3
ATP5MD
ATP5ME
ATP5MF
ATP5MF-PTCD1
ATP5MG
ATP5MGL
ATP5MPL
ATP5PB
ATP5PD
ATP5PF
ATP5PO
ATP6
ATP6
ATP6
ATP6AP1
ATP6AP1L
ATP6AP2
ATP6V0A1
ATP6V0A2
ATP6V0A4
ATP6V0B
ATP6V0C
ATP6V0D2
ATP6V0E1
ATP6V0E2
ATP6V1B1
ATP6V1B2
ATP6V1C1
ATP6V1C2
ATP6V1D
ATP6V1E1
ATP6V1E2
ATP6V1F
ATP6V1FNB
ATP6V1G2
ATP6V1G3
ATP7A
ATP7B
ATP8
ATP8
ATP8
ATP8A1
ATP8A2
ATP8B1
ATP8B2
ATP8B3
ATP8B4
ATP9B
ATPAF1
ATPAF2
ATPSCKMT
ATR
ATRNL1
ATRX
ATXN1
ATXN10
ATXN1L
ATXN2L
ATXN3
ATXN3L
ATXN7
ATXN7L1
ATXN7L2
ATXN7L3
ATXN7L3B
ATXN8
AUH
AURKA
AURKAIP1
AURKB
AURKC
AUTS2
AVEN
AVIL
AVPI1
AVPR1A
AVPR1B
AWAT1
AWAT2
AXDND1
AXIN1
AXIN2
AXL
AZGP1
AZIN1
AZIN2
AZU1
B2M
B3GALNT1
B3GALNT2
B3GALT1
B3GALT4
B3GAT1
B3GAT3
B3GLCT
B3GNT2
B3GNT3
B3GNT5
B3GNT6
B3GNT7
B3GNT8
B3GNTL1
B4GALNT1
B4GALNT2
B4GALNT3
B4GALNT4
B4GALT1
B4GALT2
B4GALT3
B4GALT4
B4GALT5
B4GALT7
B4GAT1
B9D1
B9D2
BAALC
BABAM1
BABAM2
BACE2
BACH1
BACH2
BAD
BAG1
BAG2
BAG3
BAG4
BAG6
BAGE
BAGE2
BAGE3
BAGE4
BAGE5
BAHCC1
BAIAP2
BAIAP2L1
BAIAP2L2
BAIAP3
BAK1
BAMBI
BANF1
BANF2
BANK1
BAP1
BARD1
BARHL1
BARHL2
BARX1
BARX2
BASP1
BATF
BAX
BAZ1A
BAZ1B
BAZ2A
BAZ2B
BBC3
BBOF1
BBOX1
BBS1
BBS12
BBS2
BBS4
BBS5
BBS7
BBS9
BBX
BCAM
BCAN
BCAP29
BCAP31
BCAR1
BCAR3
BCAS1
BCAS3
BCAS4
BCAT1
BCAT2
BCCIP
BCHE
BCKDHA
BCKDK
BCL10
BCL11A
BCL11B
BCL2
BCL2L1
BCL2L10
BCL2L11
BCL2L12
BCL2L13
BCL2L14
BCL2L15
BCL2L2
BCL2L2-PABPN1
BCL3
BCL6
BCL7A
BCL7B
BCL7C
BCL9
BCL9L
BCLAF1
BCLAF3
BCO1
BCOR
BCORL1
BCR
BCS1L
BDH1
BDH2
BDKRB1
BDKRB2
BDNF
BDP1
BEAN1
BECN1
BECN2
BEGAIN
BEND2
BEND3
BEND5
BEND7
BEST2
BEST3
BEST4
BET1
BET1L
BEX1
BEX3
BEX4
BEX5
BFAR
BFSP1
BFSP2
BGLAP
BGN
BHLHA15
BHLHE22
BHLHE23
BHLHE40
BHLHE41
BHMG1
BHMT
BHMT2
BICC1
BICD1
BICD2
BICDL1
BICDL2
BICRA
BICRAL
BID
BIK
BIN1
BIN3
BIRC2
BIRC3
BIRC5
BIRC6
BIRC7
BIVM
BIVM-ERCC5
BLCAP
BLID
BLK
BLM
BLMH
BLNK
BLOC1S2
BLOC1S3
BLOC1S4
BLOC1S6
BMF
BMI1
BMP1
BMP10
BMP15
BMP2
BMP2K
BMP3
BMP4
BMP5
BMP6
BMP7
BMP8A
BMP8B
BMPER
BMPR1A
BMPR1B
BMPR2
BMS1
BMT2
BMX
BNC1
BNC2
BNIP2
BNIP3
BOC
BOD1
BOD1L1
BOK
BOLA1
BOLA2
BOLA2B
BOLA2-SMG1P6
BOLA3
BOLL
BOP1
BORA
BORCS5
BORCS6
BORCS7
BORCS8
BORCS8-MEF2B
BPGM
BPHL
BPIFB1
BPIFB2
BPIFB3
BPIFB6
BPIFC
BPNT1
BPTF
BPY2
BPY2B
BPY2C
BRAF
BRAP
BRAT1
BRCC3
BRD1
BRD2
BRD3
BRD3OS
BRD4
BRD7
BRD8
BRD9
BRDT
BRF2
BRI3
BRI3BP
BRICD5
BRINP1
BRINP2
BRINP3
BRIP1
BRIX1
BRK1
BRMS1
BRMS1L
BROX
BRPF1
BRPF3
BRS3
BRSK1
BRWD1
BRWD3
BSCL2
BSDC1
BSG
BSN
BSND
BSPH1
BSPRY
BST1
BST2
BTAF1
BTBD1
BTBD11
BTBD17
BTBD18
BTBD19
BTBD3
BTBD6
BTBD7
BTBD8
BTBD9
BTD
BTF3
BTG1
BTG2
BTG4
BTK
BTLA
BTN1A1
BTN2A1
BTN2A2
BTN3A1
BTN3A2
BTN3A3
BTNL10
BTNL3
BTNL8
BTNL9
BTRC
BUB1
BUB1B
BUB1B-PAK6
BUB3
BUD23
BVES
BYSL
BZW1
BZW2
C10orf105
C10orf111
C10orf113
C10orf120
C10orf142
C10orf143
C10orf25
C10orf53
C10orf62
C10orf67
C10orf71
C10orf88
C10orf90
C10orf95
C11orf16
C11orf24
C11orf42
C11orf44
C11orf45
C11orf52
C11orf54
C11orf65
C11orf80
C11orf86
C11orf91
C11orf94
C11orf95
C11orf97
C11orf98
C12orf10
C12orf29
C12orf4
C12orf40
C12orf43
C12orf45
C12orf49
C12orf50
C12orf54
C12orf56
C12orf57
C12orf65
C12orf66
C12orf71
C12orf73
C12orf74
C12orf75
C12orf76
C12orf77
C12orf80
C12orf81
C13orf42
C13orf46
C14orf119
C14orf132
C14orf178
C14orf180
C14orf28
C14orf93
C15orf32
C15orf39
C15orf40
C15orf41
C15orf48
C15orf53
C15orf56
C15orf61
C15orf62
C15orf65
C16orf46
C16orf71
C16orf72
C16orf78
C16orf82
C16orf86
C16orf87
C16orf89
C16orf91
C16orf92
C16orf95
C16orf96
C16orf97
C17orf102
C17orf107
C17orf112
C17orf113
C17orf51
C17orf58
C17orf75
C17orf77
C17orf78
C17orf82
C18orf12
C18orf21
C18orf25
C18orf32
C18orf54
C18orf63
C18orf65
C19orf24
C19orf25
C19orf33
C19orf38
C19orf44
C19orf47
C19orf67
C19orf73
C19orf81
C19orf84
C19orf85
C1D
C1GALT1
C1GALT1C1L
C1orf100
C1orf112
C1orf115
C1orf116
C1orf122
C1orf127
C1orf131
C1orf134
C1orf141
C1orf146
C1orf147
C1orf159
C1orf167
C1orf174
C1orf194
C1orf195
C1orf196
C1orf198
C1orf21
C1orf210
C1orf232
C1orf35
C1orf50
C1orf52
C1orf53
C1orf54
C1orf61
C1orf87
C1orf94
C1QA
C1QBP
C1QL1
C1QL2
C1QL3
C1QL4
C1QTNF12
C1QTNF2
C1QTNF3
C1QTNF4
C1QTNF5
C1QTNF6
C1QTNF8
C1QTNF9
C1QTNF9B
C1R
C1RL
C2
C20orf141
C20orf144
C20orf173
C20orf194
C20orf202
C20orf203
C20orf204
C20orf27
C20orf78
C20orf85
C21orf58
C21orf59-TCP10L
C21orf62
C21orf91
C22orf15
C22orf23
C22orf24
C22orf31
C22orf34
C22orf42
C22orf46
C2CD2L
C2CD3
C2CD4A
C2CD4B
C2CD4C
C2CD5
C2CD6
C2orf15
C2orf16
C2orf27A
C2orf27B
C2orf40
C2orf42
C2orf48
C2orf49
C2orf50
C2orf66
C2orf68
C2orf69
C2orf70
C2orf72
C2orf73
C2orf74
C2orf76
C2orf78
C2orf80
C2orf81
C2orf88
C2orf91
C2orf92
C3
C3orf14
C3orf18
C3orf22
C3orf33
C3orf35
C3orf36
C3orf38
C3orf49
C3orf52
C3orf67
C3orf70
C3orf79
C3orf80
C3orf84
C3orf85
C3orf86
C4B_2
C4BPA
C4BPB
C4orf3
C4orf33
C4orf36
C4orf45
C4orf46
C4orf48
C4orf50
C4orf51
C4orf54
C5
C5AR2
C5orf15
C5orf24
C5orf34
C5orf46
C5orf47
C5orf49
C5orf56
C5orf60
C5orf63
C5orf64
C5orf67
C6
C6orf106
C6orf118
C6orf120
C6orf136
C6orf141
C6orf201
C6orf203
C6orf222
C6orf223
C6orf226
C6orf48
C6orf52
C6orf62
C6orf89
C6orf99
C7
C7orf25
C7orf26
C7orf31
C7orf33
C7orf65
C7orf66
C7orf69
C7orf77
C8A
C8B
C8orf17
C8orf33
C8orf34
C8orf37
C8orf44
C8orf48
C8orf49
C8orf58
C8orf59
C8orf74
C8orf76
C8orf82
C8orf86
C8orf87
C8orf88
C8orf89
C9
C9orf116
C9orf118
C9orf129
C9orf131
C9orf135
C9orf139
C9orf147
C9orf152
C9orf153
C9orf16
C9orf163
C9orf170
C9orf24
C9orf40
C9orf43
C9orf64
C9orf66
C9orf78
C9orf85
C9orf92
CA1
CA11
CA13
CA14
CA2
CA4
CA6
CA8
CA9
CAAP1
CAB39
CABCOCO1
CABIN1
CABLES1
CABLES2
CABP1
CABP2
CABP4
CABP5
CABP7
CACFD1
CACHD1
CACNA1A
CACNA1B
CACNA1C
CACNA1D
CACNA1E
CACNA1F
CACNA1G
CACNA1H
CACNA1I
CACNA1S
CACNA2D1
CACNA2D3
CACNA2D4
CACNB1
CACNB2
CACNB4
CACNG3
CACNG4
CACNG6
CACNG7
CACNG8
CACTIN
CACUL1
CACYBP
CAD
CADM1
CADM2
CADM4
CADPS
CADPS2
CAGE1
CALB1
CALB2
CALCA
CALCB
CALCOCO1
CALCR
CALCRL
CALD1
CALHM1
CALHM2
CALHM3
CALHM4
CALHM5
CALHM6
CALM2
CALML3
CALML4
CALML5
CALML6
CALN1
CALR
CALU
CALY
CAMK1
CAMK1D
CAMK1G
CAMK2A
CAMK2B
CAMK2G
CAMK2N1
CAMK2N2
CAMKK1
CAMKK2
CAMKMT
CAMKV
CAMLG
CAMP
CAMSAP1
CAMSAP2
CAMSAP3
CAMTA1
CAND1
CAND2
CANT1
CANX
CAP1
CAP2
CAPG
CAPN1
CAPN10
CAPN11
CAPN12
CAPN14
CAPN15
CAPN2
CAPN3
CAPN6
CAPN7
CAPN8
CAPN9
CAPNS1
CAPNS2
CAPRIN1
CAPRIN2
CAPS
CAPS2
CAPZA2
CAPZA3
CAPZB
CARD10
CARD11
CARD14
CARD16
CARD17
CARD18
CARD19
CARD6
CARD9
CARF
CARMIL1
CARMIL2
CARMIL3
CARNMT1
CARNS1
CARS
CARS2
CARTPT
CASC1
CASC10
CASC4
CASD1
CASK
CASKIN1
CASKIN2
CASP1
CASP10
CASP12
CASP14
CASP2
CASP3
CASP5
CASP6
CASP8
CASP8AP2
CASP9
CASQ1
CASQ2
CASR
CASS4
CAST
CASTOR1
CASTOR2
CASTOR3
CASZ1
CAT
CATSPER1
CATSPER2
CATSPER3
CATSPER4
CATSPERB
CATSPERD
CATSPERE
CATSPERG
CATSPERZ
CAV1
CAV2
CAV3
CAVIN1
CAVIN2
CAVIN3
CAVIN4
CBARP
CBFA2T2
CBFA2T3
CBFB
CBLB
CBLC
CBLIF
CBLL1
CBLL2
CBLN2
CBLN3
CBLN4
CBR1
CBR3
[truncated: 14,705 more rows]
