# Supplementary material for: EARN: an ensemble machine learning algorithm to predict driver genes in metastatic breast cancer
Source: BMC Med Genomics. 2021 May 7;14:122. doi: 10.1186/s12920-021-00974-3 (PMC8105935; doi:10.1186/s12920-021-00974-3)
Supplement: Supplementary file 6 — Additional file 6: Table S13–S26. The list of mutated genes extracted by software tools for BRCA and MBCA, and comparison among these genes (p value ≤ 0.05) for MBCA [file 12920_2021_974_MOESM6_ESM.xls]

## Sheet: Table S13
EARN: an ensemble machine learning algorithm to predict driver genes in metastatic breast cancer
Leila Mirsadeghi1, Reza Haji Hosseini1*, Ali Mohammad Banaei-Moghaddam2, Kaveh Kavousi3*
* Correspondence: kkavousi@ut.ac.ir; hosseini@pnu.ac.ir;
1Department of Biology, Faculty of Science, Payame Noor University, Tehran, Iran
2 Laboratory of Genomics and Epigenomics (LGE), Department of Biochemistry, Institute of Biochemistry and Biophysics (IBB), University of Tehran, Tehran, Iran
3 Laboratory of Complex Biological Systems and Bioinformatics (CBB), Department of Bioinformatics, Institute of Biochemistry and Biophysics (IBB), University of Tehran, Tehran, Iran
Additional file 6: Table S13 The mutated genes as features based on p-value for BRCA
Symbol	OncodriveFM	OncodriveCLUST	NetBox	MutsigCV
A1BG	0	0	0	0.142009
A1CF	0.688591	0	0	0.307143
A2M	0.403995	0	0	0.172473
A2ML1	0.750956	0	0	0.363412
A3GALT2	0	0	0	0
A4GALT	0	0	0	0.462866
A4GNT	0	0	0	0
AAAS	0.291592	0	0.9542	0.250288
AACS	0.507831	0	0	0.273609
AADAC	0.183547	0	0.92969	0.92969
AADACL2	0	0	0	0.118821
AADACL3	0	0	0	0
AADACL4	0.493139	0	0	0.669519
AADAT	0	0	0	0
AAGAB	0	0	0	0.23258
AAK1	0.00873096	0	0	0.194993
AAMDC	0	0	0	0
AAMP	0	0	0	0
AANAT	0	0	0	0.708205
AAR2	0	0	0	0
AARD	0	0	0	0
AARS	0.737512	0	0.971921	0.971921
AARS2	0.854853	0	0	0.055608
AARSD1	0	0	0	0
AASDH	0.623744	0	0	0.0314166
AASDHPPT	0.10966	0	0	0.421345
AASS	0.486386	0	0	0.244654
AATF	0.469377	0	0.9099	0.496473
AATK	0.165798	0	0	0.257988
ABAT	0.574147	0	0	0.0537211
ABCA1	0.536692	0	0	0.0001817
ABCA10	0.525061	0	0	0.25508
ABCA12	0.209366	0	0	0.499829
ABCA13	0.1315	0	0	0.0008556
ABCA2	0.921783	0	0	0.0003485
ABCA3	0.149986	0	0	0.19213
ABCA4	0.325173	0	0	0.115486
ABCA5	0.84949	0	0	0.0674233
ABCA6	0.379293	0	0	0.512711
ABCA7	0.0734311	0	0	0.870602
ABCA8	0.217135	0	0	0.689908
ABCA9	0.570086	0	0	0.308932
ABCB1	0.861591	0	0	0.0019887
ABCB10	0.591674	0	0	0.552642
ABCB11	0.500647	0	0	0.852981
ABCB4	0.116396	0	0	0.322929
ABCB5	0.433944	0	0	0.0031649
ABCB6	0.519947	0	0	0.162217
ABCB7	0.666896	0	0	0.141959
ABCB8	0.626954	0	0	0.878925
ABCB9	0.614654	0	0	0.0550767
ABCC1	0.676695	0	0	0.0711237
ABCC10	0.270122	0	0	0.233961
ABCC11	0.692473	0	0	0.0099952
ABCC12	0.283387	0	0	0.153729
ABCC2	0.365534	0	0	0.116779
ABCC3	0.557709	0	0	0.0043298
ABCC4	0.528494	0	0	0.138605
ABCC5	0.321039	0	0	0.212149
ABCC6	0.149211	0	0	0.184782
ABCC8	0.323115	0	0	0.450576
ABCC9	0.367427	0	0	0.47877
ABCD1	0.868085	0	0	0.434161
ABCD2	0.243337	0	0	0.369243
ABCD3	0.415434	0	0	0.336793
ABCD4	0	0	0	0
ABCE1	0.675995	0	0	0.121259
ABCF1	0.502201	0	0	0.392593
ABCF2	0.160497	0	0	0.337896
ABCF3	0.880822	0	0	0.383949
ABCG1	0.936702	0	0	0.0334706
ABCG2	0	0	0	0.0539866
ABCG4	0.631177	0	0	0.0201505
ABCG5	0.545623	0	0	0.177679
ABCG8	0.226039	0	0	0.370028
ABHD1	0	0	0	0.245379
ABHD10	0	0	0	0
ABHD11	0	0	0	0
ABHD12	0.616691	0	0.954215	0.954215
ABHD12B	0	0	0	0
ABHD13	0.514383	0	0	0.730193
ABHD14A	0	0	0	0
ABHD14A-ACY1	0	0	0	0
ABHD14B	0	0	0	0
ABHD15	0	0	0	0.212185
ABHD16A	0.0683431	0	0	0
ABHD16B	0	0	0	0
ABHD17A	0	0	0	0
ABHD17B	0	0	0	0
ABHD17C	0	0	0	0
ABHD18	0	0	0	0
ABHD2	0.533169	0	0	0.700744
ABHD3	0	0	0	0.31457
ABHD4	0	0	0	0.787281
ABHD5	0	0	0	0.244238
ABHD6	0	0	0	0.247559
ABHD8	0	0	0	0.0831163
ABI1	0.580979	0	0	0.587893
ABI2	0.378055	0	0	0.309184
ABI3	0	0	0	0.184904
ABI3BP	0.654302	0	0	0.279603
ABITRAM	0	0	0	0
ABL1	0.909513	0	0.9661	0.256881
ABL2	0.991406	0	0	0.128453
ABLIM1	0.603624	0	0	0.0544836
ABLIM2	0.144799	0	0	0.0343452
ABLIM3	0.537521	0	0	0.614487
ABO	0	0	0	0.17409
ABR	0.627979	0.999641	0	0.0024023
ABRA	0.376128	0	0	0.0926008
ABRACL	0	0	0	0
ABRAXAS1	0	0	0	0
ABRAXAS2	0	0	0	0
ABT1	0.707604	0	0.908628	0.908628
ABTB1	0	0	0	0
ABTB2	0	0	0	0.680135
ACAA1	0	0	0	0
ACAA2	0.344371	0	0	0.677387
ACACA	0.192675	0	0	0.015496
ACACB	0.733848	0	0	0.0710662
ACAD10	0.248915	0	0	0.504492
ACAD11	0.182206	0	0	0.647975
ACAD8	0	0	0	0.414459
ACAD9	0.587263	0	0	0.196801
ACADL	0	0	0	0.0696508
ACADM	0	0	0	0
ACADS	0	0	0	0
ACADSB	0.445002	0	0	0.501037
ACADVL	0.587504	0	0	0.307904
ACAN	0.546927	0	0	0.328716
ACAP1	0.245886	0	0	0.170202
ACAP2	0	0	0	0.13696
ACAP3	0	0	0	0.102433
ACAT1	0.30715	0	0	0.392022
ACAT2	0	0	0	0.115144
ACBD3	0.382216	0	0	0.352315
ACBD4	0.512631	0	0	0.363541
ACBD5	0.851033	0	0	0.429902
ACBD6	0	0	0	0.588329
ACBD7	0	0	0	0
ACCS	0	0	0	0.12772
ACCSL	0.532034	0	0	0.553071
ACD	0	0	0	0.148297
ACE	0.453316	0	0	0.20859
ACE2	0	0	0	0.619261
ACER1	0	0	0	0.278504
ACER2	0.671524	0	0	0.62564
ACER3	0.547663	0	0	0.874867
ACHE	0.663015	0	0	0.0331438
ACIN1	0.9558	0	0	0.161699
ACKR1	0.937633	0	0	0
ACKR2	0	0	0	0
ACKR3	0.746193	0	0	0
ACKR4	0.606042	0	0	0
ACLY	0.767507	0	0	0.815294
ACMSD	0	0	0	0
ACO1	0	0	0	0.363063
ACO2	0.0127423	0	0	0.76043
ACOD1	0	0	0	0
ACOT1	0	0	0	0.301141
ACOT11	0.363293	0	0	0.313022
ACOT12	0	0	0	0.0041681
ACOT13	0	0	0	0
ACOT2	0	0	0	0
ACOT4	0.637577	0	0	0.301972
ACOT6	0	0	0	0
ACOT7	0	0	0	0.18614
ACOT8	0	0	0	0.331397
ACOT9	0.898487	0	0	0.49651
ACOX1	0.322178	0	0	0.151528
ACOX2	0.146303	0	0	0.113852
ACOX3	0.685655	0	0	0.303867
ACOXL	0.0133521	0	0	0.773981
ACP1	0	0	0	0
ACP2	0	0	0	0.402655
ACP4	0	0	0	0
ACP5	0.583404	0	0	0.438489
ACP6	0.25821	0	0	0.327948
ACP7	0	0	0	0
ACPP	0.500978	0	0	0.113639
ACR	0.542399	0	0	0.384458
ACRBP	0.919022	0	0	0.724596
ACRV1	0	0	0	0.677334
ACSBG1	0.309451	0	0	0.503417
ACSBG2	0.56463	0	0	0.362796
ACSF2	0.761764	0	0	0.003653
ACSF3	0.736461	0	0	0.403997
ACSL1	0	0	0	0.045171
ACSL3	0.227153	0	0	0.0199111
ACSL4	0.411958	0	0	0.264025
ACSL5	0.309188	0	0	0.381412
ACSL6	0.803219	0	0	0.147973
ACSM1	0	0	0	0.0778408
ACSM2A	0.734583	0	0	0.196587
ACSM2B	0.405845	0	0	0.65159
ACSM3	0.329831	0	0	0.0758209
ACSM4	0.13345	0	0	0.432596
ACSM5	0.19928	0	0	0.576264
ACSM6	0.44252	0	0	0
ACSS1	0	0	0	0.0232706
ACSS2	0.964742	0	0	0.107269
ACSS3	0.7412	0.99836	0	0.523998
ACTA1	0.242719	0	0.8423	0.360328
ACTA2	0.346376	0	0	0.563086
ACTB	0.771857	0	0.7823	0.870592
ACTBL2	0.523703	0	0	0.868313
ACTC1	0	0	0.8186	0
ACTG1	0.71141	0	0.988946	0.988946
ACTG2	0.939392	0	0	0.771594
ACTL10	0	0	0	0
ACTL6A	0	0	0	0.824465
ACTL6B	0	0	0	0.857443
ACTL7A	0	0	0	0.104027
ACTL7B	0.898452	0	0	0.231962
ACTL8	0.825407	0	0	0.450809
ACTL9	0.306651	0	0	0.581202
ACTN1	0	0	0	0.0214588
ACTN2	0.751373	0	0	0.0512981
ACTN3	0.675362	0	0	0.376984
ACTN4	0.943083	0	0	0.772079
ACTR10	0.270974	0	0	0.279622
ACTR1A	0.771316	0	0	0.570654
ACTR1B	0.413722	0	0	0.370776
ACTR2	0	0	0	0.206654
ACTR3	0	0	0	0.483008
ACTR3B	0.386782	0	0	0.386603
ACTR3C	0	0	0	0.628067
ACTR5	0.807157	0	0	0.0433742
ACTR6	0	0	0	0.518849
ACTR8	0.743299	0	0	0.116645
ACTRT1	0.711038	0	0	0.421866
ACTRT2	0.887671	0	0	0.486173
ACTRT3	0	0	0	0
ACVR1	0	0	0	0.386888
ACVR1B	0.927522	0	0.999894	0.999894
ACVR1C	0.369077	0	0	0.408815
ACVR2A	0.706106	0	0	0.77523
ACVR2B	0	0	0.9392	0.0943189
ACVRL1	0	0	0	0.238457
ACY1	0	0	0	0
ACY3	0	0	0	0.219356
ACYP1	0.908352	0	0	0.792342
ACYP2	0	0	0	0
ADA	0.261221	0	0	0.325184
ADA2	0	0	0	0
ADAD1	0.542952	0	0	0.62015
ADAD2	0	0	0	0
ADAL	0	0	0	0.105464
ADAM10	0.212078	0	0	0.262608
ADAM11	0.254147	0	0	0.186858
ADAM12	0.993655	0	0	0.207525
ADAM15	0.825148	0	0	0.409836
ADAM17	0	0	0	0
ADAM18	0	0	0	0.252577
ADAM19	0.176553	0	0	0.310676
ADAM2	0.724281	0	0	0.0517327
ADAM20	0.757674	0	0	0.231915
ADAM21	0.105318	0	0	0.0776083
ADAM22	0	0	0	0
ADAM23	0.17983	0	0	0.380197
ADAM28	0.40551	0	0	0.108422
ADAM29	0.24675	0	0	0.413647
ADAM30	0.519871	0	0	0.0277041
ADAM32	0.552222	0	0	0.603139
ADAM33	0.841492	0	0	0.281671
ADAM7	0.678215	0	0	0.0142896
ADAM8	0	0	0	0
ADAM9	0	0	0	0
ADAMDEC1	0.585334	0	0	0.206616
ADAMTS1	0.929123	0	0	0.156198
ADAMTS10	0.239399	0	0	0.0266119
ADAMTS12	0.656552	0	0	0.190385
ADAMTS13	0.868681	0	0	0.797126
ADAMTS14	0.205744	0	0	0.00784
ADAMTS15	0	0	0	0.0229148
ADAMTS16	0.69399	0	0	0.0001337
ADAMTS17	0.263222	0	0.941765	0.941765
ADAMTS18	0.241726	0	0	0.0498927
ADAMTS19	0.272017	0	0	0.806361
ADAMTS2	0.539035	0	0	0.0516825
ADAMTS20	0.476029	0	0	0.025727
ADAMTS3	0.0901654	0	0	0.0019823
ADAMTS4	0	0	0	0.076472
ADAMTS5	0.85647	0	0	0.203817
ADAMTS6	0.389222	0	0	0.217515
ADAMTS7	0.284621	0	0	0.387418
ADAMTS8	0	0	0	0.0010497
ADAMTS9	0.888325	0	0	0.167338
ADAMTSL1	0.965511	0	0	0.347354
ADAMTSL2	0.516852	0	0	0.36905
ADAMTSL3	0.525243	0	0	0.484174
ADAMTSL4	0.664548	0	0	0.0109545
ADAMTSL5	0	0	0	0
ADAP1	0	0	0	0
ADAP2	0	0	0	0.25354
ADAR	0.112895	0	0	0.0967824
ADARB1	0.827805	0	0	0.243369
ADARB2	0.346787	0	0	0.182855
ADAT1	0	0	0	0.0930668
ADAT2	0	0	0	0.364187
ADAT3	0	0	0	0
ADCK1	0	0	0	0.445452
ADCK2	0.400628	0	0	0.447737
ADCK5	0.443914	0	0	0.235924
ADCY1	0.0762656	0	0	0.223469
ADCY10	0.972067	0	0	0.0638735
ADCY2	0.668211	0	0	0.0221043
ADCY3	0.302151	0	0	0.0119531
ADCY4	0.395515	0	0	0.0274857
ADCY5	0.570542	0	0	0.517744
ADCY6	0	0	0	0
ADCY7	0.836314	0	0	0.60544
ADCY8	0.650429	0	0	0.487315
ADCY9	0.400894	0	0	0.589709
ADCYAP1	0	0	0	0
ADCYAP1R1	0	0	0	0.0529765
ADD1	0.369077	0	0	0.0781685
ADD2	0.980155	0.971791	0	0.870401
ADD3	0.632532	0	0	0.144314
ADGB	0.464271	0	0	0
ADGRA1	0.386682	0	0	0
ADGRA2	0.122738	0	0	0
ADGRA3	0.841987	0	0	0
ADGRB1	0.56547	0	0	0
ADGRB2	0.853047	0	0	0
ADGRB3	0.393948	0	0	0
ADGRD1	0.563273	0	0	0
ADGRD2	0.0413139	0	0	0
ADGRE1	0.782814	0	0	0
ADGRE2	0.196655	0	0	0
ADGRE3	0.486936	0	0	0
ADGRE5	0.568429	0	0	0
ADGRF1	0.640183	0	0	0
ADGRF2	0.955815	0	0	0
ADGRF3	0.448925	0	0	0
ADGRF4	0	0	0	0
ADGRF5	0.23852	0	0	0
ADGRG1	0	0	0	0
ADGRG2	0.926814	0	0	0
ADGRG3	0.64458	0	0	0
ADGRG4	0.181836	0	0	0
ADGRG5	0.718835	0	0	0
ADGRG6	0.522971	0	0	0
ADGRG7	0.360926	0	0	0
ADGRL1	0.478156	0	0	0
ADGRL2	0.967239	0	0	0
ADGRL3	0.734178	0	0	0
ADGRL4	0.527175	0	0	0
ADGRV1	0.5477	0	0	0
ADH1A	0.715468	0	0	0.2841
ADH1B	0	0	0	0
ADH1C	0.670378	0	0	0.491675
ADH4	0	0	0	0.277184
ADH5	0	0	0	0.0241095
ADH6	0.620927	0	0	0.371252
ADH7	0.267881	0	0	0.149574
ADHFE1	0.993748	0	0	0.059195
ADI1	0	0	0	0
ADIG	0	0	0	0.609685
ADIPOQ	0	0	0	0
ADIPOR1	0	0	0	0.287157
ADIPOR2	0	0	0	0.5164
ADIRF	0	0	0	0
ADK	0	0	0	0.361095
ADM	0	0	0	0
ADM2	0	0	0	0
ADM5	0.468619	0	0	0
ADNP	0.84237	0	0	0.258386
ADNP2	0.700746	0	0	0.178288
ADO	0	0	0	0
ADORA1	0.936702	0	0	0.579122
ADORA2A	0.319091	0	0	0.691407
ADORA2B	0	0	0	0
ADORA3	0.334593	0	0	0.0002795
ADPGK	0.835846	0	0	0.330169
ADPRH	0.810723	0	0	0.690284
ADPRHL1	0.305116	0	0	0.628106
ADPRHL2	0	0	0	0.2368
ADPRM	0	0	0	0
ADRA1A	0.69503	0	0	0.327791
ADRA1B	0	0	0	0.0621082
ADRA1D	0	0	0	0
ADRA2A	0	0	0	0
ADRA2B	0.335928	0	0	0.437084
ADRA2C	0	0	0	0.126592
ADRB1	0	0	0.932	0
ADRB2	0.188542	0	0	0.638858
ADRB3	0	0	0	0
ADRM1	0	0	0	0.0467113
ADSL	0.579851	0	0	0.381434
ADSS	0.210217	0	0	0.862821
ADSSL1	0	0	0	0
ADTRP	0	0	0	0
AEBP1	0.608662	0	0	0.194689
AEBP2	0.620754	0	0	0.0188096
AEN	0	0	0	0.153276
AES	0	0	0.9275	0
AFAP1	0.305052	0	0	0.0596582
AFAP1L1	0.889813	0	0	0.735763
AFAP1L2	0	0	0	0.78372
AFDN	0	0	0	0
AFF1	0.470127	0	0	0.431745
AFF2	0.793725	0	0.954951	0.954951
AFF3	0.769679	0	0	0.0001883
AFF4	0.93721	0	0	0.0893367
AFG1L	0	0	0	0
AFG3L2	0.606695	0	0	0.114952
AFM	0.846494	0	0	0.150797
AFMID	0	0	0	0
AFP	0	0	0	0.0720939
AFTPH	0.807735	0	0	0.286375
AGA	0	0	0	0
AGAP1	0.792986	0	0	0.0751511
AGAP11	0	0	0	0
AGAP2	0.782009	0	0	0.188949
AGAP3	0.211502	0	0	0.497063
AGAP4	0	0	0	0.0114857
AGAP5	0.631978	0	0	0.684399
AGAP6	0.348677	0	0	0.0937083
AGAP9	0.18718	0	0	0
AGBL1	0.138078	0	0	0.77046
AGBL2	0.60489	0	0	0.079955
AGBL3	0.351944	0	0	0.895933
AGBL4	0.696874	0	0	0.27105
AGBL5	0.467018	0	0	0.253583
AGER	0	0	0	0
AGFG1	0	0	0	0.0785536
AGFG2	0.148041	0	0	0.793881
AGGF1	0.862686	0	0	0.19601
AGK	0.791048	0	0	0.875344
AGL	0.446881	0	0	0.016842
AGMAT	0.257797	0	0	0.58642
AGMO	0.844914	0	0	0
AGO1	0.724475	0	0	0
AGO2	0.289126	0	0	0
AGO3	0.548736	0	0	0
AGO4	0.272956	0	0	0
AGPAT1	0	0	0	0.621778
AGPAT2	0	0	0	0
AGPAT3	0.439605	0	0	0.34535
AGPAT4	0.552582	0	0	0.2171
AGPAT5	0	0	0	0
AGPS	0.528352	0	0	0.376369
AGR2	0	0	0	0
AGR3	0	0	0	0
AGRN	0.183156	0	0	0.0354605
AGRP	0	0	0	0
AGT	0.00804755	0	0	0.518792
AGTPBP1	0.745183	0.999964	0	0.406701
AGTR1	0	0	0.8728	0.0198424
AGTR2	0.392484	0	0	0.404177
AGTRAP	0	0	0	0
AGXT	0	0	0	0.291339
AGXT2	0.297088	0	0	0.0679085
AHCTF1	0.674477	0	0	0.335722
AHCY	0.401574	0	0	0.803856
AHCYL1	0	0	0	0.191106
AHCYL2	0.590675	0	0	0.226361
AHDC1	0	0	0	0.0035576
AHI1	0.655789	0	0	0.0534878
AHNAK	0.5425	0	0	0.0055323
AHNAK2	0.2557	0	0	0
AHR	0.83368	0	0	0.0516273
AHRR	0.514285	0	0	0.291499
AHSA1	0.174452	0	0	0.57872
AHSG	0	0	0	0
AHSP	0.626717	0	0	0.665746
AICDA	0	0	0	0.477181
AIDA	0	0	0	0.78681
AIF1	0	0	0	0
AIF1L	0	0	0	0
AIFM1	0.570192	0	0	0.0512079
AIFM2	0.280632	0	0	0.32499
AIFM3	0.332836	0	0	0.224553
AIG1	0	0	0	0.719462
AIM2	0	0	0	0.118331
AIMP1	0	0	0	0.272018
AIMP2	0	0	0	0.121803
AIP	0	0	0	0
AIPL1	0	0	0	0.137693
AIRE	0	0	0	0.0465047
AJAP1	0.256033	0	0	0.203455
AJM1	0	0	0	0
AJUBA	0	0	0	0
AK1	0	0	0	0
AK2	0	0	0	0
AK3	0	0	0	0.229952
AK4	0	0	0	0
AK5	0.408584	0	0	0.69445
AK6	0	0	0	0
AK7	0.529758	0	0	0.28866
AK8	0.817393	0	0	0
AK9	0.294414	0	0	0
AKAIN1	0	0	0	0
AKAP1	0.344664	0	0	0.184563
AKAP10	0.397271	0	0	0.0184649
AKAP11	0.623789	0	0	0.367614
AKAP12	0.779626	0	0	0.317398
AKAP13	0.100921	0	0	0.425173
AKAP14	0	0	0	0.0028144
AKAP17A	0.276624	0	0	0
AKAP2	0	0	0	0
AKAP3	0.966349	0	0	0.501804
AKAP4	0.970212	0	0	0.33362
AKAP5	0	0	0	0
AKAP6	0.434438	0	0	0.493229
AKAP7	0	0	0	0.14395
AKAP8	0.870775	0	0	0.129718
AKAP8L	0.897872	0	0	0.228936
AKAP9	0.2141	0	0	0.322338
AKIP1	0	0	0	0
AKIRIN1	0	0	0.947503	0.947503
AKIRIN2	0	0	0	0
AKNA	0.832821	0	0	0.528614
AKNAD1	0.307301	0	0	0.340738
AKR1A1	0	0	0	0.686017
AKR1B1	0	0	0	0.589584
AKR1B10	0	0	0	0.747372
AKR1B15	0	0	0	0.25791
AKR1C1	0.358489	0	0	0.614149
AKR1C2	0.833796	0	0	0.468318
AKR1C3	0	0	0	0.20418
AKR1C4	0.963804	0	0	0.426226
AKR1D1	0	0	0	0.236826
AKR1E2	0	0	0	0.157249
AKR7A2	0	0	0	0
AKR7A3	0	0	0	0.0715611
AKR7L	0	0	0	0.345322
AKT1	1	1	1	1
AKT1S1	0	0	0	0
AKT2	0.657223	0	0.8728	0.500077
AKT3	0.487037	0	0.989816	0.989816
AKTIP	0.186838	0	0	0.51561
ALAD	0	0	0	0
ALAS1	0.945893	0	0	0.172691
ALAS2	0.576234	0	0	0.524605
ALB	0	0	0	0.297866
ALCAM	0.694879	0	0	0.64699
ALDH16A1	0	0	0	0.188616
ALDH18A1	0.937148	0	0	0.65309
ALDH1A1	0.645873	0	0	0.0314588
ALDH1A2	0	0	0	0
ALDH1A3	0.315267	0	0.982048	0.982048
ALDH1B1	0	0	0	0.0988382
ALDH1L1	0.135849	0	0	0.717322
ALDH1L2	0.763105	0	0	0.744478
ALDH2	0	0	0	0
ALDH3A1	0	0	0	0
ALDH3A2	0.898235	0	0	0.405507
ALDH3B1	0.462748	0	0	0.44477
ALDH3B2	0.525537	0	0	0.403023
ALDH4A1	0	0	0	0
ALDH5A1	0.832361	0	0	0.307354
ALDH6A1	0	0	0	0.0526466
ALDH7A1	0	0	0	0
ALDH8A1	0.426857	0	0	0.291606
ALDH9A1	0.308466	0	0	0.0024511
ALDOA	0.400938	0.999964	0	0.677155
ALDOB	0.372654	0	0	0.560525
ALDOC	0.659528	0	0	0.656704
ALG1	0	0	0	0.601515
ALG10	0.486475	0	0	0.199408
ALG10B	0.92957	0	0	0.234454
ALG11	0	0	0	0.182897
ALG12	0	0	0	0.181268
ALG13	0.38167	0	0	0.475126
ALG14	0	0	0	0.337876
ALG1L	0	0	0	0
ALG1L2	0	0	0	0.889569
ALG2	0.453281	0	0	0.358249
ALG3	0	0	0	0.263382
ALG5	0.329124	0	0	0.602511
ALG6	0	0	0	0.541511
ALG8	0	0	0	0.11049
ALG9	0	0	0	0.103414
ALK	0.658011	0	0	0.0118247
ALKAL1	0	0	0	0
ALKAL2	0	0	0	0
ALKBH1	0.38577	0	0	0.526278
ALKBH2	0	0	0	0.800837
ALKBH3	0	0	0	0.676894
ALKBH4	0	0	0	0
ALKBH5	0.880125	0	0	0.477691
ALKBH6	0	0	0	0
ALKBH7	0	0	0	0.807206
ALKBH8	0.504026	0	0	0.240233
ALLC	0.214763	1	0	0.701777
ALMS1	0.0811	0	0	0.0310341
ALOX12	0.650718	0	0	0.37764
ALOX12B	0	0	0	0.0566658
ALOX15	0.366156	0	0	0.61757
ALOX15B	0.834024	0	0	0.0615424
ALOX5	0	0	0	0.0311854
ALOX5AP	0	0	0	0.605777
ALOXE3	0.231554	0	0	0.823305
ALPG	0	0	0	0
ALPI	0.563593	0	0	0.36543
ALPK1	0.918251	0	0	0.0857718
ALPK2	0.448801	0	0	0.174912
ALPK3	0.898187	0	0	0.0159354
ALPL	0.949765	0	0	0.228963
ALPP	0	0	0	0
ALS2	0.661439	0	0	0.0876667
ALS2CL	0.452429	0	0	0.101386
ALS2CR12	0	0	0	0.100379
ALX1	0.574349	0	0	0.224902
ALX3	0	0	0	0
ALX4	0.256978	0	0	0.0976256
ALYREF	0	0	0	0
AMACR	0	0	0	0.0581264
AMBN	0.595777	0	0	0.773286
AMBP	0.166229	0	0	0.422335
AMBRA1	0.254329	0	0	0.32682
AMD1	0.442149	0	0	0.231942
AMDHD1	0.445339	0	0	0.49639
AMDHD2	0	0	0	0.0081041
AMELX	0	0	0	0.838375
AMELY	0	0	0	0
AMER1	0.654676	0	0	0
AMER2	0.769382	0	0	0
AMER3	0.521358	0	0	0
AMFR	0	0	0	0
AMH	0	0	0	0.247916
AMHR2	0.577233	0	0	0.279998
AMIGO1	0.888046	0	0	0.12925
AMIGO2	0	0	0	0.356365
AMIGO3	0.832375	0	0	0.110976
AMMECR1	0	0	0	0
AMMECR1L	0	0	0	0.246577
AMN	0	0	0	0.255723
AMN1	0	0	0	0
AMOT	0	0	0	0.0185556
AMOTL1	0.865417	0	0	0.321437
AMOTL2	0	0	0	0.0071574
AMPD1	0.704	0	0	0.34174
AMPD2	0	0	0	0.0060587
AMPD3	0.782052	0	0	0.199248
AMPH	0.329104	0	0	0.575559
AMT	0	0	0	0
AMTN	0	0	0	0.687899
AMY1A	0	0	0	0
AMY1B	0	0	0	0
AMY1C	0	0	0	0.0003745
AMY2A	0	0	0	0.191517
AMY2B	0	0	0	0
AMZ1	0	0	0	0.391208
AMZ2	0.249023	0	0	0.0014395
ANAPC1	0.433762	0	0.7241	0.0435289
ANAPC10	0	0	0.8073	0.367599
ANAPC11	0	0	0.7241	0.156235
ANAPC13	0	0	0	0
ANAPC15	0	0	0	0
ANAPC16	0	0	0	0
ANAPC2	0	0	0.8128	0
ANAPC4	0.72177	0	0.7241	0.0546549
ANAPC5	0.61148	0	0.7261	0.330118
ANAPC7	0.124253	0	0.8128	0.646249
ANG	0	0	0	0
ANGEL1	0.774574	0	0	0.592809
ANGEL2	0.854088	0	0	0.316073
ANGPT1	0.644727	0	0	0.710825
ANGPT2	0	0	0	0.0586868
ANGPT4	0.223247	0	0	0.690656
ANGPTL1	0.916222	0	0	0.534374
ANGPTL2	0	0	0	0
ANGPTL3	0.614128	0	0	0.323738
ANGPTL4	0.958905	0	0	0.299924
ANGPTL5	0.936716	0	0	0.32458
ANGPTL6	0	0	0	0
ANGPTL7	0	0	0	0.199238
ANGPTL8	0	0	0	0
ANHX	0	0	0	0
ANK1	0.858889	0	0	0.49737
ANK2	0.9328	0	0	0.0025384
ANK3	0.9641	0	0.9596	0.208731
ANKAR	0.243582	0	0	0.464318
ANKDD1A	0	0	0	0
ANKDD1B	0	0	0	0
ANKEF1	0	0	0	0
ANKFN1	0.333693	0	0	0.282557
ANKFY1	0.722573	0	0	0.011022
ANKH	0.198031	0	0	0.52845
ANKHD1	0	0	0	0
ANKHD1-EIF4EBP3	0.5973	0	0	0.53029
ANKIB1	0.716469	0	0	0.149448
ANKK1	0.552325	0	0	0.0429217
ANKLE1	0	0	0	0
ANKLE2	0.269221	0	0	0.282895
ANKMY1	0.382127	0	0	0.0839492
ANKMY2	0.404456	0	0	0.0393221
ANKRA2	0	0	0	0.218882
ANKRD1	0.854416	0	0	0.507327
ANKRD10	0	0	0	0.438164
ANKRD11	0.8681	0	0	0.3289
ANKRD12	0.25424	0	0.941442	0.941442
ANKRD13A	0	0	0	0.13644
ANKRD13B	0	0	0	0.0722995
ANKRD13C	0	0	0	0.404737
ANKRD13D	0.579042	0	0	0.212662
ANKRD16	0	0	0	0.74139
ANKRD17	0.3714	0	0	0.673997
ANKRD18A	0.246071	0	0	0.253537
ANKRD18B	0	0	0	0
ANKRD2	0	0	0.907641	0.907641
ANKRD20A1	0	0	0	0.0252155
ANKRD20A2	0	0	0	0.0004491
ANKRD20A3	0	0	0	0
ANKRD20A4	0	0	0	0.0100798
ANKRD22	0	0	0	0
ANKRD23	0	0	0	0
ANKRD24	0.108567	0	0	0.0186896
ANKRD26	0.630472	0	0	0.871746
ANKRD27	0.922928	0	0	0.219347
ANKRD28	0.264614	0	0	0.67026
ANKRD29	0	0	0	0.270742
ANKRD30A	0.318849	0	0.976556	0.976556
ANKRD30B	0.541954	0	0	0.307486
ANKRD30BL	0	0	0	0
ANKRD31	0.181807	0	0	0.0053574
ANKRD33	0	0	0	0.137704
ANKRD33B	0	0	0	0
ANKRD34A	0.80505	0	0	0.280922
ANKRD34B	0.552361	0	0	0.193041
ANKRD34C	0.621371	0	0	0.605446
ANKRD35	0.369781	0	0	0.135786
ANKRD36	0.347044	0	0	0.374382
ANKRD36B	0.404009	0	0	0.139704
ANKRD36C	0.501194	0	0	0
ANKRD37	0	0	0	0.507333
ANKRD39	0	0	0	0.472754
ANKRD40	0.488582	0	0	0.436676
ANKRD40CL	0	0	0	0
ANKRD42	0	0	0	0.196636
ANKRD44	0.913787	0	0	0.008676
ANKRD45	0	0	0	0.207416
ANKRD46	0	0	0	0.364799
ANKRD49	0.417738	0	0	0.686064
ANKRD50	0.501969	0	0	0.0536231
ANKRD52	0	0	0	0.015645
ANKRD53	0	0	0	0
ANKRD54	0	0	0	0.584411
ANKRD55	0	0	0	0.175637
ANKRD6	0.31531	0	0	0.315041
ANKRD60	0	0	0	0
ANKRD61	0	0	0	0
ANKRD62	0.610439	0	0	0
ANKRD63	0	0	0	0
ANKRD65	0	0	0	0
ANKRD66	0	0	0	0
ANKRD7	0	0	0	0.318447
ANKRD9	0	0	0	0
ANKS1A	0.650299	0	0	0.517253
ANKS1B	0.766833	0	0	0.19019
ANKS3	0	0	0	0
ANKS4B	0.860367	0	0	0.331685
ANKS6	0.339625	0	0	0.416512
ANKUB1	0	0	0	0
ANKZF1	0.249782	0	0	0.324487
ANLN	0.451269	0.999964	0	0.0194451
ANO1	0.73838	0	0	0.810431
ANO10	0.346357	0	0	0.068925
ANO2	0.522356	0	0	5.28e-05
ANO3	0.204051	0	0	0.0004772
ANO4	0.447818	0	0	0.411184
ANO5	0.0998564	0	0	0.428264
ANO6	0.262376	0.999641	0	0.0003927
ANO7	0.551085	0	0	0.146567
ANO8	0.413749	0	0	0.110973
ANO9	0.590378	0	0	0.149857
ANOS1	0	0	0	0
ANP32A	0	0	0	0.769763
ANP32B	0.508435	0	0	0.536445
ANP32C	0	0	0	0
ANP32D	0	0	0	0.0294126
ANP32E	0.378732	0	0	0.792388
ANPEP	0.482246	0	0	0.536015
ANTXR1	0.884131	0	0	0.0012227
ANTXR2	0	0	0.9911	0.276335
ANTXRL	0	0	0	0
ANXA1	0.40423	0	0	0.690676
ANXA10	0.117101	0	0	0.35585
ANXA11	0.54669	0	0	0.169332
ANXA13	0.889493	0	0.941063	0.941063
ANXA2	0	0	0	0
ANXA2R	0	0	0	0
ANXA3	0.0534453	0	0	0.633042
ANXA4	0.81875	0	0	0.860847
ANXA5	0	0	0	0
ANXA6	0.506739	0	0	0.171863
ANXA7	0.692791	0	0	0.362972
ANXA8	0	0	0	0.0102045
ANXA8L1	0.458102	0	0	0.0935797
ANXA9	0.745447	0	0	0.737087
AOAH	0	0	0	0.0791187
AOC1	0	0	0	0
AOC2	0.626912	0	0	0.168784
AOC3	0	0	0	0.246363
AOPEP	0	0	0	0
AOX1	0.779285	0	0	0.360817
AP1AR	0	0	0	0.234407
AP1B1	0.791355	0	0.9474	0.167246
AP1G1	0.259281	0	0.8514	0.384485
AP1G2	0.635537	0	0	0.860474
AP1M1	0	0	0	0
AP1M2	0	0	0	0.544854
AP1S1	0	0	0	0
AP1S2	0	0	0	0
AP1S3	0	0	0	0.515878
AP2A1	0.258868	0	0	0.665191
AP2A2	0.117307	0	0	0.286925
AP2B1	0.425034	0	0	0.420046
AP2M1	0	0	0	0.211747
AP2S1	0	0	0	0.527472
AP3B1	0.273984	0	0	0.287234
AP3B2	0.581883	0	0	0.0724586
AP3D1	0.331746	0	0	0.031326
AP3M1	0.911882	0	0	0.541246
AP3M2	0.558724	0	0	0.544971
AP3S1	0	0	0	0.390692
AP3S2	0	0	0	0
AP4B1	0.503338	0	0	0.400035
AP4E1	0.235926	0	0	0.373408
AP4M1	0.832332	0	0.904737	0.904737
AP4S1	0	0	0	0.34111
AP5B1	0.381384	0	0	0
AP5M1	0	0	0	0
AP5S1	0	0	0	0
AP5Z1	0	0	0	0
APAF1	0.937148	0	0	0.0675189
APBA1	0.354936	0	0.905455	0.905455
APBA2	0.777729	0.999641	0	0.156977
APBA3	0.368638	0	0	0.2018
APBB1	0	0	0	0.0173084
APBB1IP	0.59268	0	0	0.409346
APBB2	0.33372	0	0	0.0406144
APBB3	0.80965	0	0	0.547313
APC	0.9997	0	0	0.0320975
APC2	0.4392	0	0	0.157521
APCDD1	0.707377	0	0	0.125605
APCDD1L	0	0	0	0
APCS	0.434493	0	0	0.680086
APEH	0	0	0	0
APELA	0	0	0	0
APEX1	0.0176696	0	0.8066	0.597251
APEX2	0.307897	0	0	0.792881
APH1A	0.474744	1	0	0.525056
APH1B	0	0	0	0.0005314
API5	0.609073	0	0	0.691371
APIP	0	0	0	0
APLF	0.562594	0	0	0.825358
APLN	0	0	0	0
APLNR	0.750674	0	0	0.583108
APLP1	0.818939	0	0.8728	0.668419
APLP2	0	0	0.9971	0.0349594
APMAP	0.164904	0	0	0
APOA1	0.150712	0	0	0.0196206
APOA2	0	0	0	0
APOA4	0	0	0	0
APOA5	0	0	0	0.122921
APOB	0.7853	0	0.7955	0.0064209
APOBEC1	0.454366	0	0	0.593454
APOBEC2	0	0	0	0.307522
APOBEC3A	0	0	0	0.872783
APOBEC3A_B	0	0	0	0
APOBEC3B	0	0	0	0.522783
APOBEC3C	0	0	1	1
APOBEC3D	0	0	0	0
APOBEC3F	0	0	0	0.248118
APOBEC3G	0.384704	0	0	0.515045
APOBEC3H	0	0	0	0
APOBEC4	0	0	0	0.20103
APOBR	0.10959	0	0	0
APOC1	0	0	0	0
APOC2	0	0	0	0.55597
APOC3	0	0	0	0
APOC4	0	0	0	0
APOD	0	0	0	0.342677
APOE	0	0	0	0
APOF	0.500068	0	0	0.573271
APOH	0.505576	0	0	0.158755
APOL1	0	0	0	0.559705
APOL2	0.476801	0	0	0.544108
APOL3	0	0	0	0.145662
APOL4	0	0	0	0
APOL5	0.407543	0	0	0.264377
APOL6	0.653022	0	0	0.38769
APOLD1	0	0	0	0.245681
APOM	0	0	0	0
APOO	0	0	0	0.399101
APOOL	0.458288	0	0	0.397242
APOPT1	0	0	0	0
APP	0.0375214	0	0.9968	0.239077
APPBP2	0.682611	0	0	0.317787
APPL1	0.473501	0	0.953	0.323326
APPL2	0.669918	0	0	0.229629
APRT	0	0	0	0
APTX	0.902276	0	0	0.793771
AQP1	0	0	0	0
AQP10	0.57269	0	0	0.682797
AQP11	0	0	0	0.443066
AQP12A	0.39714	0	0	0.864895
AQP12B	0	0	0	0
AQP2	0	0	0	0
AQP3	0	0	0	0
AQP4	0	0	0	0.0812714
AQP5	0.983589	0	0	0.723314
AQP6	0	0	0	0.283285
AQP7	0	0	0	0.199386
AQP8	0	0	0	0.245704
AQP9	0	0	0	0
AQR	0.452878	0	0	0.0674203
AR	0.854088	0	0.9758	0.700819
ARAF	0.812977	0	0	0.705995
ARAP1	0.539687	0	0	0.0404837
ARAP2	0.183968	0	0	0.0249022
ARAP3	0.553829	0	0	0.521067
ARC	0	0	0	0.184905
ARCN1	0	0	0	0
AREG	0.183821	0	0	0.180821
AREL1	0.943621	0	0	0
ARF1	0.318092	0	0	0.815397
ARF3	0	0	0	0
ARF4	0	0	0	0.387142
ARF5	0	0	0	0.501903
ARF6	0	0	0.8186	0
ARFGAP1	0	0	0	0.588979
ARFGAP2	0	0	0	0.275404
ARFGAP3	0	0	0	0.468955
ARFGEF1	0.667337	0.874339	0	0.625172
ARFGEF2	0.512023	0	0	0.63267
ARFGEF3	0.187455	0	0	0
ARFIP1	0.314097	0	0	0.246749
ARFIP2	0.624741	0	0	0.486667
ARFRP1	0	0	0.964004	0.964004
ARG1	0.437805	0	0	0.208425
ARG2	0	0	0	0.556158
ARGFX	0	0	0	0.33599
ARGLU1	0	0	0	0.0501691
ARHGAP1	0	0	0.9024	0
ARHGAP10	0	0	0	0.542957
ARHGAP11A	0.240395	0	0	0.0159857
ARHGAP11B	0	0	0	0.584472
ARHGAP12	0.10828	0	0	0.587711
ARHGAP15	0.784607	0	0	0.444223
ARHGAP17	0.497496	0	0	0.377706
ARHGAP18	0.163608	0	0	0.267128
ARHGAP19	0	0	0	0.0150309
ARHGAP20	0.582148	0	0	0.0646281
ARHGAP21	0.827552	0	0	0.0448312
ARHGAP22	0	0	0	0
ARHGAP23	0.82418	0	0	0.129761
ARHGAP24	0.600333	0	0	0.39214
ARHGAP25	0.579656	0	0	0.151235
ARHGAP26	0.562487	0	0	0.0947719
ARHGAP27	0.799135	0	0	0.310106
ARHGAP28	0.681717	0	0	0.0547907
ARHGAP29	0.218952	0	0	0.65363
ARHGAP30	0.29764	0	0	0.177003
ARHGAP31	0.998125	0	0	0.0047711
ARHGAP32	0.541954	0	0	0.0500499
ARHGAP33	0.129864	0	0	0.531498
ARHGAP35	0.891554	0	0	0
ARHGAP36	0.322178	0	0	0.369311
ARHGAP39	0	0	0	0.0056354
ARHGAP4	0.431828	0	0	0.127048
ARHGAP40	0	0	0	0
ARHGAP42	0.420395	0	0	0.234927
ARHGAP44	0	0	0	0
ARHGAP45	0	0	0	0
ARHGAP5	0.314533	0	0.987742	0.987742
ARHGAP6	0.433161	0	0	0.329071
ARHGAP8	0	0	0	0
ARHGAP9	0.0569579	0.999999	0	0.611067
ARHGDIA	0	0	0.9099	0.533996
ARHGDIB	0	0	0	0.367651
ARHGDIG	0	0	0	0
ARHGEF1	0.329062	0	0.979726	0.979726
ARHGEF10	0.533413	0	0	0.0003828
ARHGEF10L	0.875907	0	0	0.0008745
ARHGEF11	0.522251	0.989849	0.9659	4.52e-05
ARHGEF12	0.240427	0	0	0.16787
ARHGEF15	0.53687	0	0	0.443922
ARHGEF16	0.473246	0	0	0.108526
ARHGEF17	0	0	0	0.0467902
ARHGEF18	0	0	0	0.136085
ARHGEF19	0	0	0	0.0066973
ARHGEF2	0.386976	0	0.932	0.535344
ARHGEF25	0.65543	0	0	0
ARHGEF26	0.280335	0	0	0
ARHGEF28	0.679874	0	0	0
ARHGEF3	0	0	0	0.161697
ARHGEF33	0.412523	0	0	0.178583
ARHGEF35	0	0	0	0.0877348
ARHGEF37	0	0	0	0.13749
ARHGEF38	0	0	0	0
ARHGEF39	0.541565	0	0	0
ARHGEF4	0.458658	0	0	0.555335
ARHGEF40	0.979176	0	0	0
ARHGEF5	0.461877	0	0	0.0175162
ARHGEF6	0.150133	0	0	0.669169
ARHGEF7	0.121469	0	0.9683	0.575579
ARHGEF9	0.255188	0	0	0.445871
ARID1A	0.2155	0.833809	0.999998	0.999998
ARID1B	0.7411	0	0	0.222118
ARID2	0.703447	0	0	0.585255
ARID3A	0	0	0.9979	0.0198762
ARID3B	0.191436	0	0	0.684851
ARID3C	0.55439	0	0	0.707338
ARID4A	0.280751	0	0	0.0437701
ARID4B	0.807552	0	0	0.79457
ARID5A	0	0	0	0.172054
ARID5B	0.273443	0	0	0.102294
ARIH1	0	0	0	0.20766
ARIH2	0	0	0	0.11529
ARIH2OS	0.976121	0	0	0
ARL1	0	0	0	0.735967
ARL10	0	0	0	0.509928
ARL11	0.43704	0	0	0.629435
ARL13A	0	0	0	1.2e-06
ARL13B	0	0	0	0.504581
ARL14	0	0	0	0
ARL14EP	0	0	0	0
ARL14EPL	0	0	0	0
ARL15	0	0	0	0.153918
ARL16	0	0	0	0
ARL17A	0	0	0	0
ARL17B	0	0	0	0
ARL2	0	0	0	0.451111
ARL2BP	0	0	0	0
ARL3	0	0	0.9659	0.442029
ARL4A	0.207626	0	0	0.472126
ARL4C	0	0	0	0
ARL4D	0	0	0.9099	0
ARL5A	0	0	0	0.498104
ARL5B	0.302767	0	0	0.496814
ARL5C	0	0	0	0
ARL6	0	0	0	0.472225
ARL6IP1	0	0	0	0.367362
ARL6IP4	0	0	0	0.34792
ARL6IP5	0	0	0	0
ARL6IP6	0.856695	0	0	0.675425
ARL8A	0	0	0	0
ARL8B	0	0	0	0.37475
ARL9	0	0	0	0.540674
ARMC1	0	0	0	0.618164
ARMC10	0	0	0	0.445589
ARMC12	0.302979	0	0	0
ARMC2	0.2721	0	0	0.0268654
ARMC3	0.587832	0	0	0.112636
ARMC4	0.676876	0	0	0.0537631
ARMC5	0.459466	0	0	0.159528
ARMC6	0.799972	0	0	0.507419
ARMC7	0.479374	0	0	0.517815
ARMC8	0	0	0	0.0251352
ARMC9	0.340859	0	0	0.851539
ARMCX1	0.957682	0	0	0.479087
ARMCX2	0.738954	0	0	0.794903
ARMCX3	0	0	0	0.0986974
ARMCX4	0	0	0	0
ARMCX5	0.947346	0	0	0.243097
ARMCX5-GPRASP2	0	0	0	0
ARMCX6	0.698021	0	0	0.251668
ARMH1	0	0	0	0
ARMH2	0	0	0	0
ARMH3	0	0	0	0
ARMH4	0	0	0	0
ARMS2	0	0	0	0
ARMT1	0	0	0	0
ARNT	0.617362	0	0.7787	0.532175
ARNT2	0	0	0	0
ARNTL	0.952149	0	0	0.0763488
ARNTL2	0	0	0	0.0847835
ARPC1A	0.586957	0	0	0.241895
ARPC1B	0	0	0	0.0820842
ARPC2	0.114684	0	0	0.889424
ARPC3	0	0	0	0
ARPC4	0	0	0	0
ARPC4-TTLL3	0	0	0	0
ARPC5	0	0	0	2.25e-05
ARPC5L	0.902706	0	0	0.794958
ARPIN	0.820483	0	0	0
ARPIN-AP3S2	0	0	0	0
ARPP19	0	0	0	0
ARPP21	0.282877	0	0	0.729908
ARR3	0.174226	0	0	0.250415
ARRB1	0	0	0	0.0188081
ARRB2	0	0	0	0.399001
ARRDC1	0	0	0	0.462988
ARRDC2	0	0	0	0
ARRDC3	0.366959	0	0	0.657861
ARRDC4	0	0	0	0.151477
ARRDC5	0	0	0	0
ARSA	0	0	0	0.105585
ARSB	0.794735	0	0	0.0022143
ARSD	0	0	0	0
ARSE	0.983809	0	0	0.384895
ARSF	0.667592	0	0	0.148282
ARSG	0	0	0	0.105328
ARSH	0.156843	0	0	0.13651
ARSI	0	0	0	0.267401
ARSJ	0.439705	0	0	0.0261767
ARSK	0.775996	0	0	0.452713
ART1	0	0	0	0
ART3	0	0	0	0
ART4	0	0	0	0
ART5	0	0	0	0
ARTN	0	0	0	0
ARV1	0	0	0	0.314671
ARVCF	0.781126	0	0	0.307652
ARX	0	0	0	0.015531
AS3MT	0.141033	0	0	0.872236
ASAH1	0	0	0	0
ASAH2	0.936702	0	0	0.218053
ASAH2B	0	0	0	0
ASAP1	0.587391	0	0	0.428016
ASAP2	0.336407	0	0	0.688719
ASAP3	0.356747	0	0	0.0864988
ASB1	0.439968	0	0	0.436883
ASB10	0.0428608	0	0	0.471376
ASB11	0	0	0	0.241132
ASB12	0.511377	0	0	0.440827
ASB13	0.54493	0	0	0.788122
ASB14	0	0	0	0.138614
ASB15	0.36317	0	0	0.0661341
ASB16	0	0	0	0
ASB17	0.515527	0	0	0.531626
ASB18	0	0	0	0.565512
ASB2	0	0	0	0.0168173
ASB3	0	0	0	0
ASB4	0.731294	0	0	0.0028415
ASB5	0.479479	0	0	0.657939
ASB6	0	0	0	0.0403371
ASB7	0.548987	0	0	0.485054
ASB8	0	0	0	0.356804
ASB9	0.483455	0	0	0.549774
ASCC1	0	0	0	0.140905
ASCC2	0.269788	0	0.8248	0.0411579
ASCC3	0.354371	0	0	0.150428
ASCL1	0	0	0	0
ASCL2	0	0	0	0
ASCL3	0	0	0	0.578909
ASCL4	0	0	0	0
ASCL5	0	0	0	0
ASDURF	0	0	0	0
ASF1A	0	0	0.9867	0.305894
ASF1B	0	0	0.9596	0.0508229
ASGR1	0	0	0	0
ASGR2	0.935018	0	0	0.340734
ASH1L	0.437317	0	0	0.447727
ASH2L	0.655584	0	0	0.382984
ASIC1	0.449079	0	0	0
ASIC2	0.250391	0	0	0
ASIC3	0.328067	0	0	0
ASIC4	0.633686	0	0	0
ASIC5	0.813481	0	0	0
ASIP	0	0	0	0
ASL	0.433081	0.999641	0.975815	0.975815
ASMT	0.470444	0	0	0.552102
ASMTL	0.539321	0	0	0.529388
ASNA1	0	0	0	0.230795
ASNS	0.889056	0	0	0.122431
ASNSD1	0.158826	0	0	0.0347437
ASPA	0	0	0.954732	0.954732
ASPDH	0	0	0	0.520626
ASPG	0.32313	0	0	0.567195
ASPH	0.309239	0	0	0.0598205
ASPHD1	0	0	0	0.658096
ASPHD2	0.877154	0	0	0.465186
ASPM	0.623175	0	0	0.001865
ASPN	0	0	0	0.166336
ASPRV1	0.420719	0	0	0.534484
ASPSCR1	0	0	0	0.11224
ASRGL1	0	0	0	0.23206
ASS1	0	0	0.9247	0.578066
ASTE1	0.939852	0	0	0.0024957
ASTL	0.944409	0	0	0.743814
ASTN1	0.539414	0	0	0.776398
ASTN2	0.232327	0	0	0.194988
ASXL1	0.905073	0	0	0.582986
ASXL2	0.997388	0	0.944831	0.944831
ASXL3	0.6294	0	0	0.0320106
ASZ1	0.286557	0	0	0.861151
ATAD1	0	0	0	0.138722
ATAD2	0.2965	0	0	0.32248
ATAD2B	0.17747	0	0.979274	0.979274
ATAD3A	0.462902	0	0	0.403626
ATAD3B	0	0	0	0.228474
ATAD3C	0	0	0	0
ATAD5	0.330582	0	0	0.784392
ATAT1	0	0	0	0
ATCAY	0.543549	0	0	0.677419
ATE1	0	0	0	0
ATF1	0.104167	0	0	0.78994
ATF2	0.590534	0	0	0.61495
ATF3	0.711402	0	0.9596	0.841435
ATF4	0.686505	0	0	0.416836
ATF5	0.771403	0	0	0.717516
ATF6	0.396836	0	0	0.629176
ATF6B	0.235161	0	0	0.112984
ATF7	0	0	0	0.090677
ATF7IP	0.013578	0	0.7244	0.0710399
ATF7IP2	0	0	0	0
ATF7-NPFF	0	0	0	0
ATG10	0	0	0	0
ATG101	0	0	0	0
ATG12	0	0	0	0.440388
ATG13	0	0	0	0
ATG14	0	0	0	0
ATG16L1	0.454672	0	0.919929	0.919929
ATG16L2	0.535364	0	0	0.37031
ATG2A	0.715674	0	0	0.0500037
ATG2B	0.835793	0	0	0.001351
ATG3	0.329463	0	0	0.267058
ATG4A	0.55925	0	0	0.876827
ATG4B	0	0	0	0.171586
ATG4C	0	0	0	0.527758
ATG4D	0.592462	0	0	0.886385
ATG5	0	0	0	0.199282
ATG7	0.613911	0	0	0.282222
ATG9A	0.634657	0	0	0.205667
ATG9B	0	0	0	0.019183
ATIC	0	0	0	0.0503343
ATL1	0.479737	0	0	0.29967
ATL2	0.565132	0	0	0.169051
ATL3	0.22835	0	0	0.686229
ATM	0.264315	0.860361	0.8981	0.790284
ATMIN	0.695215	0	0	0.100153
ATN1	0.8958	0	0	0.785758
ATOH1	0.734369	0	0	0.629513
ATOH7	0	0	0	0
ATOH8	0	0	0	0
ATOX1	0	0	0	0
ATP10A	0.783775	0.971791	0	0.150133
ATP10B	0.593677	0.833809	0	0.315625
ATP10D	0.809451	0	0	0.40577
ATP11A	0.569245	0	0	0.751492
ATP11AUN	0	0	0	0
ATP11B	0.601102	0	0	0.318849
ATP11C	0.846327	0	0	0.515096
ATP12A	0.375612	0	0	6e-07
ATP13A1	0.360549	0	0	0.298299
ATP13A2	0	0	0	0.387396
ATP13A3	0.292115	0	0	0.310335
ATP13A4	0.255183	0	0.959205	0.959205
ATP13A5	0.303134	0	0	0.0494793
ATP1A1	0.365172	0	0	0.563818
ATP1A2	0.466642	0	0	0.459521
ATP1A3	0.986009	0	0	0.392235
ATP1A4	0.260132	0	0	0.656664
ATP1B1	0	0	0	0.0043571
ATP1B2	0	0	0	0
ATP1B3	0	0	0	0.740902
ATP1B4	0.778269	0	0.963781	0.963781
ATP23	0	0	0	0
ATP2A1	0.339716	0	0	0.317023
ATP2A2	0.482314	0	0	0.0472069
ATP2A3	0.604185	0	0	0.115629
ATP2B1	0.574953	0	0	0.739965
ATP2B2	0.853042	0	0	0.312714
ATP2B3	0.666423	0	0	0.811944
ATP2B4	0.313763	0	0	0.106389
ATP2C1	0.14886	0	0	0.140965
ATP2C2	0.640183	0	0	0.254405
ATP4A	0.774993	0	0	0.607285
ATP4B	0.518493	0	0	0.419003
ATP5F1A	0	0	0	0
ATP5F1B	0	0	0	0
ATP5F1C	0	0	0	0
ATP5F1D	0	0	0	0
ATP5F1E	0	0	0	0
ATP5IF1	0	0	0	0
ATP5MC1	0	0	0	0
ATP5MC2	0	0	0	0
ATP5MC3	0	0	0	0
ATP5MD	0	0	0	0
ATP5ME	0	0	0	0
ATP5MF	0	0	0	0
ATP5MF-PTCD1	0	0	0	0
ATP5MG	0	0	0	0
ATP5MGL	0	0	0	0
ATP5MPL	0	0	0	0
ATP5PB	0	0	0	0
ATP5PD	0	0	0	0
ATP5PF	0	0	0	0
ATP5PO	0	0	0	0
ATP6	0	0	0	0
ATP6	0	0	0	0
ATP6	0	0	0	0
ATP6AP1	0	0	0	0.264529
ATP6AP1L	0	0	0	0.469363
ATP6AP2	0	0	0	0.101526
ATP6V0A1	0.647224	0	0	0.3499
ATP6V0A2	0.669798	0	0	0.130303
ATP6V0A4	0.378055	0	0	0.569106
ATP6V0B	0.719196	0	0	0.725679
ATP6V0C	0	0	0	0.457748
ATP6V0D1	0	0	0	0
ATP6V0D2	0.340035	0	0	0.553957
ATP6V0E1	0.591413	0	0	0.886746
ATP6V0E2	0	0	0	0
ATP6V1A	0.697152	0	0	0.445437
ATP6V1B1	0	0	0	0.558761
ATP6V1B2	0	0	0	0.0594186
ATP6V1C1	0.552128	0	0	0.14994
ATP6V1C2	0.153604	0	0	0.0142166
ATP6V1D	0.331954	0	0	0.61908
ATP6V1E1	0	0	0	0.228765
ATP6V1E2	0.486601	0	0	0.62598
ATP6V1F	0	0	0	0
ATP6V1FNB	0	0	0	0
ATP6V1G1	0	0	0	0.50193
ATP6V1G2	0	0	0.946101	0.946101
ATP6V1G3	0	0.999964	0	0.218479
ATP6V1H	0	0	0	0.34003
ATP7A	0.7858	0	0	0.383247
ATP7B	0.486175	0	0	0.374424
ATP8	0	0	0	0
ATP8	0	0	0	0
ATP8	0	0	0	0
ATP8A1	0.463955	0	0	0.351432
ATP8A2	0.583446	0	0	0.514298
ATP8B1	0.431053	0	0	0.0473542
ATP8B2	0.952891	0	0	0.493117
ATP8B3	0.669827	0	0	0.138165
ATP8B4	0.991406	0	0	0.316323
ATP9A	0.233482	0	0.921109	0.921109
ATP9B	0.655336	0	0	0.0157382
ATPAF1	0	0	0	0.798467
ATPAF2	0	0	0	0
ATPSCKMT	0	0	0	0
ATR	0.417721	0	0.9967	0.147417
ATRAID	0	0	0	0
ATRIP	0.816952	0	0	0.0954509
ATRN	0.179664	0	0	0.0228404
ATRNL1	0.419152	0	0	0.0228005
ATRX	0.8644	0	0	0.45122
ATXN1	0.710908	0	0.826	0.287847
ATXN10	0	0	0	0.264212
ATXN1L	0	0	0	0.0682921
ATXN2	0.7116	0.946612	0	0.445835
ATXN2L	0.823174	0	0	0.0374318
ATXN3	0.502646	0	0	0.472319
ATXN3L	0.258932	0	0	0.863388
ATXN7	0.79877	0	0	0.0763717
ATXN7L1	0.729863	0	0	0.230629
ATXN7L2	0	0	0	0.020496
ATXN7L3	0.831889	0	0	0.551807
ATXN7L3B	0	0	0	0
ATXN8	0	0	0	0
AUH	0	0	0	0.144023
AUNIP	0.903485	0	0	0
AUP1	0.944409	0	0	0.366744
AURKA	0.352874	0	0.9761	0.442658
AURKAIP1	0	0	0.950983	0.950983
AURKB	0	0	0.8128	0.551581
AURKC	0	0	0	0.500034
AUTS2	0.739615	0	0	0.0402381
AVEN	0	0	0	0.117709
AVIL	0.845526	0	0	0.358668
AVL9	0.679213	0	0	0.54325
AVP	0	0	0	0
AVPI1	0.7045	0	0	0.798236
AVPR1A	0	0	0	0.140054
AVPR1B	0.231827	0	0	0.76671
AVPR2	0.898294	0	0	0.639432
AWAT1	0.645884	0	0	0.775278
AWAT2	0.485849	0	0	0.719836
AXDND1	0.549804	0	0	0
AXIN1	0.513665	0	0	0.312551
AXIN2	0.803219	0	0	0.0200415
AXL	0.747038	0	0	0.227494
AZGP1	0	0	0	0.291773
AZI2	0	0	0	0.0896176
AZIN1	0.57269	0	0	0.668449
AZIN2	0	0	0	0
AZU1	0	0	0	0
B2M	0.569465	0	0.918839	0.918839
B3GALNT1	0	0	0	0.13711
B3GALNT2	0	0	0	0.217687
B3GALT1	0	0	0	0.17077
B3GALT2	0	0	0	0.147333
B3GALT4	0.772389	0	0.907944	0.907944
B3GALT5	0.717849	0	0	0.578213
B3GALT6	0	0	0	0
B3GAT1	0	0	0	0
B3GAT2	0	0	0	0.274476
B3GAT3	0	0	0	0.367053
B3GLCT	0	0	0	0
B3GNT2	0	0	0	0.682115
B3GNT3	0.570685	0	0	0.143913
B3GNT4	0.355352	0	0	0.492443
B3GNT5	0.927369	0	0	0.22214
B3GNT6	0	0	0	0.220661
B3GNT7	0.746172	0	0	0.532877
B3GNT8	0	0	0	0.195384
B3GNT9	0.58742	0	0	0.558902
B3GNTL1	0	0	0	0.462922
B4GALNT1	0	0	0	0.0926114
B4GALNT2	0	0	0	0.0743968
B4GALNT3	0.582515	0	0	0.0836111
B4GALNT4	0.0750026	0	0	0.0213846
B4GALT1	0.608416	0	0	0.815796
B4GALT2	0	0	0	0
B4GALT3	0.2859	0	0	0.40975
B4GALT4	0.771195	0	0	0.213092
B4GALT5	0.708929	0	0.964451	0.964451
B4GALT6	0	0	0	0.221815
B4GALT7	0	0	0	0.141857
B4GAT1	0	0	0	0
B9D1	0	0	0	0
B9D2	0	0	0	0.497062
BAALC	0	0	0	0.841644
BAAT	0.444783	0	0	0.0007517
BABAM1	0	0	0	0
BABAM2	0	0	0	0
BACE1	0	0	0	0
BACE2	0	0	0	0.107302
BACH1	0.709542	0	0	0.222861
BACH2	0.440188	0	0	0.719924
BAD	0	0	0	0.456702
BAG1	0	0	0	0
BAG2	0	0	0	0.24696
BAG3	0	0	0	0.152824
BAG4	0.646005	0	0	0.330262
BAG5	0.532671	0	0	0.104426
BAG6	0.457238	0	0	0
BAGE	0	0	0	0
BAGE2	0	0	0	0
BAGE3	0	0	0	0
BAGE4	0	0	0	0
BAGE5	0	0	0	0
BAHCC1	0.1731	0	0	0.0032743
BAHD1	0.374812	0	0	0.203896
BAIAP2	0.4775	0	0.9099	0.0196153
BAIAP2L1	0.925074	0	0	0.226669
BAIAP2L2	0	0	0	0.346849
BAIAP3	0.966747	0	0	0.307651
BAK1	0.232146	0	0	0.518575
BAMBI	0	0	0	0.302017
BANF1	0	0	0.8312	0
BANF2	0	0	0.900698	0.900698
BANK1	0.76344	0	0	0.154387
BANP	0	0	0	0.0956867
BAP1	0.760634	0	0.972327	0.972327
BARD1	0	0	0.7556	0
BARHL1	0	0	0	0
BARHL2	0.15748	0	0	0.483943
BARX1	0	0	0	0
BARX2	0.807157	0	0	0.62921
BASP1	0	0	0	0.403559
BATF	0	0	0	0.673477
BATF2	0	0	0	0.629143
BATF3	0.555842	0	0	0.840838
BAX	0	0	0	0.295816
BAZ1A	0.485161	0	0.939365	0.939365
BAZ1B	0.720594	0	0	0.687096
BAZ2A	0.50687	0	0	0.15789
BAZ2B	0.5233	0	0	0.640203
BBC3	0	0	0	0
BBIP1	0	0	0	0
BBOF1	0	0	0	0
BBOX1	0	0	0	0.481822
BBS1	0	0	0	0
BBS10	0.502537	0	0	0.514117
BBS12	0	0	0	0
BBS2	0	0	0	0.0267651
BBS4	0	0	0	0.128105
BBS5	0.481173	0	0	0.413152
BBS7	0.658441	0	0	2.13e-05
BBS9	0.566321	0	0	0.438039
BBX	0.95907	0	0	0.345807
BCAM	0	0	0	0
BCAN	0.893913	0	0	0.737094
BCAP29	0	0	0	0
BCAP31	0.47605	0	0.961635	0.961635
BCAR1	0.951452	0	0.7288	0.519553
BCAR3	0.305092	0	0	0.601731
BCAS1	0.528599	0	0.998996	0.998996
BCAS2	0.313338	0	0	0.596355
BCAS3	0.687885	0	0	0.29249
BCAS4	0	0	0	0
BCAT1	0.165056	0	0	0.507539
BCAT2	0.750674	0	0	0.301663
BCCIP	0.682789	0	0	0.854978
BCDIN3D	0	0	0	0.234396
BCHE	0.619035	0	0	0.567247
BCKDHA	0.784378	0	0	0.595037
BCKDHB	0	0	0	0.0478304
BCKDK	0.355738	0	0	0.15276
BCL10	0.418004	0	0.8445	0.794524
BCL11A	0.53203	0	0	0.106464
BCL11B	0.120959	0	0	0.0092213
BCL2	0	0	0.9781	0
BCL2A1	0.817315	0	0	0.646252
BCL2L1	0.638724	0	0.9923	0.287673
BCL2L10	0	0	0	0
BCL2L11	0.760579	0	0	0.796089
BCL2L12	0	0	0	0.655089
BCL2L13	0.200666	0	0	0.296892
BCL2L14	0.908583	0	0	0.533403
BCL2L15	0	0	0	0
BCL2L2	0	0	0	0.790566
BCL2L2-PABPN1	0	0	0	0
BCL3	0	0	0	0.122733
BCL6	0.383773	0	0	0.122341
BCL6B	0	0	0	0.166076
BCL7A	0	0	0	0
BCL7B	0	0	0	0.421739
BCL7C	0	0	0	0.419531
BCL9	0.45766	0	0	0.333386
BCL9L	0.7502	0	0	0.0113503
BCLAF1	0	0	0	0.0409874
BCLAF3	0	0	0	0
BCO1	0.57269	0	0	0
BCO2	0.579901	0	0	0.866789
BCOR	0.53003	0	0	0.736117
BCORL1	0.0518	0	0	0.604298
BCR	0.497655	0	0.801	0.327429
BCS1L	0.399476	0	0	0.294927
BDH1	0.799809	0	0	0.648855
BDH2	0	0	0	0
BDKRB1	0.68256	0	0	0.656583
BDKRB2	0.557078	0	0	0.235576
BDNF	0	0	0	0.0929782
BDP1	0.835522	0	0.9435	0.0682913
BEAN1	0	0	0	0
BECN1	0	0	0	0.0306168
BECN2	0	0	0	0
BEGAIN	0	0	0	0
BEND2	0.27223	0	0	0.251437
BEND3	0.451535	0	0	0.191816
BEND4	0.581373	0	0	0.705318
BEND5	0.294457	0	0	0.232378
BEND6	0	0	0	0.114707
BEND7	0.671145	0	0	0.285906
BEST1	0.5231	0	0	0.12462
BEST2	0.476507	0	0	0.277288
BEST3	0.234952	0	0	0.626207
BEST4	0	0	0	0
BET1	0	0	0	0.51355
BET1L	0	0	0	0.788492
BEX1	0	0	0	0
BEX2	0	0	0	0.584172
BEX3	0	0	0	0
BEX4	0.83905	0	0.921027	0.921027
BEX5	0	0	0	0
BFAR	0.388281	0	0	0.811249
BFSP1	0.582673	0	0	0.741297
BFSP2	0	0	0	0.0818063
BGLAP	0	0	0	0
BGN	0	0	0	0.092351
BHLHA15	0	0	0	0
BHLHA9	0	0	0	0
BHLHB9	0	0	0	0
BHLHE22	0	0	0	0
BHLHE23	0	0	0	0
BHLHE40	0	0	0	0
BHLHE41	0.475731	0	0	0.0269881
BHMG1	0	0	0	0
BHMT	0.878744	0	0	0.217995
BHMT2	0	0	0	0.165269
BICC1	0.780058	0	0	0.0090182
BICD1	0.545656	0	0	0.0454703
BICD2	0	0	0	0.0493657
BICDL1	0	0	0	0
BICDL2	0	0	0	0
BICRA	0	0	0	0
BICRAL	0	0	0	0
BID	0.345368	0	0	0.78635
BIK	0	0	0	0
BIN1	0.670692	0	0	0.194781
BIN2	0.596143	0	0	0.345785
BIN3	0	0	0	0
BIRC2	0.324876	0	0	0.0985828
BIRC3	0.118752	0	0	0.0292614
BIRC5	0	0	0.7675	0
BIRC6	0.9984	0.821309	0	0.0056923
BIRC7	0.449683	0	0	0.436684
BIVM	0	0	0	0
BIVM-ERCC5	0.58645	0	0	0
BLCAP	0	0	0	0
BLID	0	0	0	0
BLK	0.214509	0	0	0.291531
BLM	0.381153	0	0	0.26194
BLMH	0	0	0	0.487977
BLNK	0.277017	0	0.8584	0.0362778
BLOC1S1	0	0	0	0.625534
BLOC1S2	0.588766	0	0	0.812757
BLOC1S3	0	0	0	0
BLOC1S4	0	0	0	0
BLOC1S5	0	0	0	0
BLOC1S6	0	0	0	0
BLVRA	0.625155	0	0	0.834418
BLVRB	0	0	0	0.388817
BLZF1	0	0	0	0.155687
BMF	0	0	0	0.357635
BMI1	0.664322	0	0	0.207321
BMP1	0.530029	0	0	0.442041
BMP10	0	0	0	0.0582452
BMP15	0.702373	0	0	0.537384
BMP2	0.221693	0	0	0.764036
BMP2K	0.195332	0	0	0.329246
BMP3	0.963304	0	0	0.419611
BMP4	0	0	0	0.548521
BMP5	0.731958	0	0	0.530533
BMP6	0.822991	0	0	0.192959
BMP7	0	0	0	0
BMP8A	0	0	0	0
BMP8B	0	0	0	0.204838
BMPER	0.481797	0	0	0.20118
BMPR1A	0	0	0	0.147848
BMPR1B	0.731847	0	0.8494	0.0280044
BMPR2	0.393759	0.999999	0	0.59047
BMS1	0.71817	0	0	0.0571504
BMT2	0	0	0	0
BMX	0.577492	0	0	0.8484
BNC1	0.610927	0	0	0.604123
BNC2	0.464085	0	0	0.121074
BNIP1	0	0	0	0.359758
BNIP2	0	0	0	0.143018
BNIP3	0	0	0	0.215169
BNIP3L	0	0	0	0.678383
BNIPL	0.378974	0	0	0.613115
BOC	0.727617	0	0	0.819892
BOD1	0	0	0	0
BOD1L1	0.8927	0	0	0
BOD1L2	0	0	0	0
BOK	0	0	0	0.640844
BOLA1	0.365943	0	0	0.125399
BOLA2	0	0	0	0
BOLA2B	0	0	0	0
BOLA2-SMG1P6	0	0	0	0
BOLA3	0	0	0	0
BOLL	0	0	0	0.200225
BOP1	0	0	0	0
BORA	0.38694	0	0	0
BORCS5	0	0	0	0
BORCS6	0	0	0	0
BORCS7	0	0	0	0
BORCS8	0	0	0	0
BORCS8-MEF2B	0	0	0	0
BPGM	0	0	0	0
BPHL	0	0	0	0.247035
BPI	0	0	0	0.166047
BPIFA1	0	0	0	0
BPIFA2	0	0	0	0
BPIFA3	0	0	0	0
BPIFB1	0.207843	0	0	0
BPIFB2	0	0	0	0
BPIFB3	0.660539	0	0	0
BPIFB4	0.336543	0	0	0
BPIFB6	0	0	0	0
BPIFC	0.744305	0	0	0
BPNT1	0	0	0	0.203511
BPTF	0.8457	0	0	0.0084832
BPY2	0	0	0	0
BPY2B	0	0	0	0
BPY2C	0	0	0	0
BRAF	0.401431	0	0.8656	0.780412
BRAP	0.528136	0	0.9911	0.567763
BRAT1	0	0	0	0
BRCA1	0.593205	0	0.978137	0.978137
BRCA2	0.681716	0	0.8728	0.788713
BRCC3	0	0	0	0.666575
BRD1	0.252739	0	0	0.0218687
BRD2	0	0	0	0
BRD3	0.31936	0	0	0.515869
BRD3OS	0	0	0	0
BRD4	0.4175	0	0	0.0182876
BRD7	0.784313	0.999999	0	0.381633
BRD8	0.685664	0	0	0.112484
BRD9	0.807918	0	0	0.0137697
BRDT	0.355184	0	0	0.217618
BRF1	0.692499	0	0.9651	0.262764
BRF2	0.212555	0	0.9743	0.515334
BRI3	0	0	0	0.537772
BRI3BP	0	0	0	0
BRICD5	0.339373	0	0	0
BRINP1	0.738732	0	0	0
BRINP2	0.654824	0	0	0
BRINP3	0.07524	0	0	0
BRIP1	0.262898	0.995284	0	0.590129
BRIX1	0.302702	0	0	0.447606
BRK1	0	0	0	0
BRMS1	0.783241	0	0	0.634673
BRMS1L	0.717942	0	0	0.175378
BROX	0.154707	0	0	0
BRPF1	0.0396345	0	0	0.247903
BRPF3	0.996733	0	0	0.148252
BRS3	0.193245	0	0	0.8879
BRSK1	0	0	0	0.0005749
BRSK2	0.302727	0	0	0.358819
BRWD1	0.950958	0	0	0.82113
BRWD3	0.699586	0	0	0.0150523
BSCL2	0.290997	0	0	0.553156
BSDC1	0.256231	0	0	0.601386
BSG	0	0	0	0.188871
BSN	0	0	0	0.312117
BSND	0.407121	0	0	0.869793
BSPH1	0	0	0	0
BSPRY	0	0	0	0
BST1	0.714161	0	0	0.476266
BST2	0	0	0	0.537166
BSX	0.858894	0	0	0.0011686
BTAF1	0.520788	0	0	0.0172745
BTBD1	0.736461	0	0	0.0003328
BTBD10	0.19445	0	0	0.317222
BTBD11	0.65543	0	0	0.0015481
BTBD16	0	0	0	0.0391879
BTBD17	0	0	0	0.225858
BTBD18	0.192755	0	0	0.29602
BTBD19	0.216753	0	0	0.761792
BTBD2	0	0	0.8875	0.0935249
BTBD3	0.309239	0	0	0.0465548
BTBD6	0	0	0	4e-07
BTBD7	0.664579	0	0	0.0011763
BTBD8	0	0	0	0
BTBD9	0.842077	0	0	0.0390477
BTC	0	0	0	0.449874
BTD	0.805945	0	0	0.355355
BTF3	0.672181	0	0	0.665164
BTF3L4	0	0	0	0
BTG1	0	0	0	0.501558
BTG2	0	0	0	0
BTG3	0.55208	0	0	0.486498
BTG4	0	0	0	0.501363
BTK	0.901087	0	0.931294	0.931294
BTLA	0	0	0	0
BTN1A1	0.519453	0	0	0.0729152
BTN2A1	0.836645	0	0	0.34038
BTN2A2	0.765135	0	0	0.623663
BTN3A1	0.273208	0	0	0.832334
BTN3A2	0	0	0	0.129874
BTN3A3	0.537518	0	0.958708	0.958708
BTNL10	0	0	0	0
BTNL2	0	0	0	0.237394
BTNL3	0.397187	0	0	0.26634
BTNL8	0.355865	0	0	0.586351
BTNL9	0.331468	0	0	0.142738
BTRC	0.531539	0	0.9007	0.642108
BUB1	0.601517	0	0	0.161312
BUB1B	0	0	0.8201	0.276843
BUB1B-PAK6	0	0	0	0
BUB3	0.557412	0	0.813	0.33885
BUD13	0	0	0	0.0394739
BUD23	0	0	0	0
BUD31	0	0	0	0.377618
BVES	0.566263	0	0	0.122182
BYSL	0	0	0	0.751096
BZW1	0.720453	0	0	0.609388
BZW2	0	0	0	0
C10orf105	0	0	0	0
C10orf111	0	0	0	0
C10orf113	0	0	0	0
C10orf120	0.595705	0	0	0.0209819
C10orf126	0	0	0	0
C10orf142	0	0	0	0
C10orf143	0	0	0	0
C10orf25	0	0	0	0
C10orf53	0	0	0	0.887538
C10orf55	0	0	0	0
C10orf62	0	0	0	0.339887
C10orf67	0	0	0	0
C10orf71	0.678865	0	0	0.507859
C10orf82	0	0	0	0.139068
C10orf88	0.32231	0	0	0.0293945
C10orf90	0.738336	0	0	0.0158048
C10orf95	0	0	0	0
C10orf99	0	0	0	0.374756
C11orf1	0	0	0	0
C11orf16	0.952159	0	0	0.373524
C11orf21	0	0	0	0
C11orf24	0.893651	0	0	0.811175
C11orf40	0.150601	0	0	0.804297
C11orf42	0	0	0	0
C11orf44	0	0	0	0
C11orf45	0	0	0	0.44266
C11orf49	0	0	0	0.118173
C11orf52	0	0	0.909354	0.909354
C11orf53	0	0	0	0
C11orf54	0	0	0	0
C11orf58	0.73936	0	0	0.583892
C11orf65	0	0	0	0
C11orf68	0	0	0	0
C11orf71	0	0	0	0.408133
C11orf74	0.457822	0	0	0.470893
C11orf80	0	0	0	0.166839
C11orf86	0.213537	0	0	0.842171
C11orf87	0	0	0	0
C11orf88	0	0	0	0
C11orf91	0	0	0	0
C11orf94	0	0	0	0
C11orf95	0	0	0	0.0661595
C11orf96	0	0	0	0
C11orf97	0	0	0	0
C11orf98	0	0	0	0
C12orf10	0	0	0	0
C12orf29	0	0	0	0
C12orf4	0	0	0	0.0261203
C12orf40	0.740432	0	0	0.359513
C12orf42	0	0	0	0.198022
C12orf43	0	0	0	0
C12orf45	0	0	0	0.445781
C12orf49	0	0	0	0
C12orf50	0	0	0	0.79537
C12orf54	0	0	0	0
C12orf56	0.633965	0	0	0.215052
C12orf57	0	0	0	0.648612
C12orf60	0	0	0	0.392952
C12orf65	0	0	0	0
C12orf66	0	0	0	0.0730155
C12orf71	0.61159	0	0	0.711399
C12orf73	0	0	0	0
C12orf74	0	0	0	0
C12orf75	0	0	0	0.708903
C12orf76	0	0	0	0
C12orf77	0	0	0	0
C12orf80	0	0	0	0
C12orf81	0	0	0	0
C13orf42	0	0	0	0
C13orf46	0	0	0	0
C14orf119	0	0	0	0.567923
C14orf132	0	0	0	0
C14orf177	0	0	0	0.360326
C14orf178	0	0	0	0.641414
C14orf180	0	0	0	0
C14orf28	0	0	0	0
C14orf39	0.368191	0.999935	0	0.884243
C14orf93	0.756151	0	0	0.228794
C15orf32	0	0	0	0
C15orf39	0.540237	0	0	0.109949
C15orf40	0.201822	0	0	0.304099
C15orf41	0	0	0	0
C15orf48	0	0	0	0.650183
C15orf53	0	0	0	0
C15orf56	0	0	0	0
C15orf61	0	0	0	0.486698
C15orf62	0	0	0	0
C15orf65	0	0	0	0
C16orf45	0.520716	0	0	0.617472
C16orf46	0	0	0	0.138729
C16orf47	0	0	0	0
C16orf54	0.104994	0	0	0.657242
C16orf58	0	0	0	0.0125183
C16orf70	0.147735	0	0	0.349809
C16orf71	0	0	0	0.15258
C16orf72	0	0	0	0
C16orf74	0	0	0	0
C16orf78	0	0	0	0
C16orf82	0	0	0	0
C16orf86	0	0	0	0.734155
C16orf87	0.753032	0	0.941132	0.941132
C16orf89	0.594111	0	0	0.0579382
C16orf90	0	0	0	0.399603
C16orf91	0	0	0	0.235514
C16orf92	0	0	0	0.445819
C16orf95	0	0	0	0
C16orf96	0.740935	0	0	0
C16orf97	0	0	0	0
C17orf100	0	0	0	0
C17orf102	0	0	0	0
C17orf107	0	0	0	0
C17orf112	0	0	0	0
C17orf113	0	0	0	0
C17orf47	0.794446	0	0	0.0001739
C17orf49	0	0	0	0.368082
C17orf50	0	0	0	0
C17orf51	0	0	0	0
C17orf53	0	0	0	0.804735
C17orf58	0	0	0	0
C17orf64	0.326756	0	0.936957	0.936957
C17orf67	0.594619	0	0	0.732485
C17orf75	0.586847	0	0	0.68373
C17orf77	0	0	0	0
C17orf78	0	0	0	0
C17orf80	0.785268	0	0	0.420177
C17orf82	0	0	0	0
C17orf97	0.485847	0	0	0.019408
C17orf98	0	0	0	0
C17orf99	0	0	0	0
C18orf12	0	0	0	0
C18orf21	0	0	0	0
C18orf25	0	0	0	0
C18orf32	0	0	0	0
C18orf54	0	0	0	0.156596
C18orf63	0	0	0	0
C18orf65	0	0	0	0
C19orf12	0	0	0	0.428588
C19orf18	0.854189	0	0	0.31412
C19orf24	0	0	0	0
C19orf25	0	0	0	0
C19orf33	0	0	0	0.532291
C19orf38	0	0	0	0
C19orf44	0.325145	0	0	0.656076
C19orf47	0	0	0	0
C19orf48	0	0	0	0.591617
C19orf53	0	0	0	0.643969
C19orf54	0.455499	0	0	0.251775
C19orf57	0	0	0	0.0553081
C19orf66	0	0	0	0.243927
C19orf67	0	0	0	0
C19orf71	0	0	0	0.466777
C19orf73	0.550048	0	0	0.818627
C19orf81	0	0	0	0
C19orf84	0	0	0	0
C19orf85	0	0	0	0
C1D	0	0	0	0
C1GALT1	0.288241	0	0	0.672948
C1GALT1C1	0.658945	0	0	0.648507
C1GALT1C1L	0	0	0	0
C1orf100	0	0	0	0
C1orf105	0	0	0	0
C1orf109	0	0	0	0
C1orf112	0.567542	0	0	0.28619
C1orf115	0	0	0	0
C1orf116	0.462683	0	0	0.261649
C1orf122	0	0	0	0
C1orf127	0.299925	0	0	0.0609895
C1orf131	0	0	0	0
C1orf134	0	0	0	0
C1orf141	0.146366	0	0	0.640476
C1orf146	0	0	0	0
C1orf147	0	0	0	0
C1orf158	0	0	0	0
C1orf159	0	0	0	0
C1orf162	0	0	0	0.610495
C1orf167	0	0	0	0
C1orf174	0	0	0	0
C1orf185	0	0	0	0.415222
C1orf189	0	0	0	0.549583
C1orf194	0	0	0	0.6195
C1orf195	0	0	0	0
C1orf196	0	0	0	0
C1orf198	0.982777	1	0	0.389164
C1orf21	0	0	0	0.549449
C1orf210	0	0	0	0.714284
C1orf216	0	0	0	0
C1orf226	0	0	0	0.271972
C1orf229	0	0	0	0
C1orf232	0	0	0	0
C1orf35	0	0	0	0
C1orf43	0.428264	0	0	0.848786
C1orf50	0	0	0	0.706666
C1orf52	0	0	0	0
C1orf53	0	0	0	0
C1orf54	0	0	0	0.583334
C1orf56	0	0	0	0
C1orf61	0	0	0	0.581427
C1orf68	0	0	0	0
C1orf74	0	0	0	0.244179
C1orf87	0.38909	0	0	0.0529212
C1orf94	0.473094	0	0	0.298769
C1QA	0	0	0	0.525951
C1QB	0	0	0	0.506208
C1QBP	0	0	0.8656	0
C1QC	0	0	0	0
C1QL1	0	0	0	0
C1QL2	0	0	0	0
C1QL3	0	0	0	0
C1QL4	0	0	0	0
C1QTNF1	0	0	0	0
C1QTNF12	0	0	0	0
C1QTNF2	0	0	0	0.003171
C1QTNF3	0	0	0	0.370945
C1QTNF4	0	0	0	0
C1QTNF5	0	0	0	0.460453
C1QTNF6	0	0	0	0.391796
C1QTNF7	0	0	0	0.145736
C1QTNF8	0	0	0	0
C1QTNF9	0	0	0	0.173721
C1QTNF9B	0	0	0	0.027354
C1R	0.565158	0	0	0.0030088
C1RL	0.415328	0	0	0.545357
C1S	0	0	0	0.143632
C2	0	0	0	0.194534
C20orf141	0	0	0	0
C20orf144	0	0	0	0
C20orf173	0	0	0	0.816098
C20orf194	0	0	0	0.0015146
C20orf197	0	0	0	0
C20orf202	0	0	0	0
C20orf203	0	0	0	0
C20orf204	0	0	0	0
C20orf27	0	0	0	0
C20orf78	0	0	0	0
C20orf85	0	0	0	0
C20orf96	0	0	0	0.128435
C21orf58	0	0	0	0.224732
C21orf59-TCP10L	0	0	0	0
C21orf62	0	0	0	0
C21orf91	0.596671	0	0	0.506841
C22orf15	0	0	0	0
[truncated: 18,216 more rows]

## Sheet: Table S14
EARN: an ensemble machine learning algorithm to predict driver genes in metastatic breast cancer
Leila Mirsadeghi1, Reza Haji Hosseini1*, Ali Mohammad Banaei-Moghaddam2, Kaveh Kavousi3*
* Correspondence: kkavousi@ut.ac.ir; hosseini@pnu.ac.ir;
1Department of Biology, Faculty of Science, Payame Noor University, Tehran, Iran
2 Laboratory of Genomics and Epigenomics (LGE), Department of Biochemistry, Institute of Biochemistry and Biophysics (IBB), University of Tehran, Tehran, Iran
3 Laboratory of Complex Biological Systems and Bioinformatics (CBB), Department of Bioinformatics, Institute of Biochemistry and Biophysics (IBB), University of Tehran, Tehran, Iran
Additional file 6: Table S14 The mutated genes as features based on p-value for MBCA
Symbol	OncodriveFM	OncodriveCLUST	Netbox	MutsigCV
A1BG	0.8457	0	0	0.808018
A1CF	0	0	0	0.212437
A2M	0	0	0	0.160929
A2ML1	0.78163	0.817591	0	0.0803535
A3GALT2	0	0	0	0
A4GALT	0	0	0	0.452554
A4GNT	0	0	0	0
AAAS	0	0	0.7388	0.619084
AACS	0	0	0	0.212547
AADAC	0.445105	0	0	0.565303
AADACL2	0	0	0	0.559498
AADACL3	0	0	0	0.6116
AADACL4	0	0	0	0.32523
AADAT	0	0	0	0
AAGAB	0	0	0	0
AAK1	0.139592	0	0	0.0100703
AAMDC	0	0	0	0
AAMP	0	0	0	0
AANAT	0	0	0	0
AAR2	0	0	0	0
AARD	0	0	0	0
AARS	0	0	0	0.0701354
AARS2	0	0	0	0.129386
AARSD1	0	0	0	0
AASDH	0	0	0	0.315061
AASDHPPT	0	0	0	0.513543
AASS	0.845969	0.817591	0.914	0.403532
AATF	0	0	0	0
AATK	0	0	0	0.771094
ABAT	0.942598	0.650126	0.972593	0.972593
ABCA1	0	0	0.9362	0.0235433
ABCA10	0	0	0	0.0112339
ABCA12	0.626274	0.515402	0	0.595627
ABCA13	0.209746	0	0	0.0006159
ABCA2	0.512343	0.465105	0	0.342064
ABCA3	0.874269	0	0	0.042238
ABCA4	0.960245	0	0	0.118349
ABCA5	0	0	0	0.259856
ABCA6	0.863542	0	0	0.0206316
ABCA7	0	0	0	0.0024538
ABCA8	0.377493	0	0	0.0341734
ABCA9	0	0	0	0.0800436
ABCB1	0	0	0	0.150676
ABCB10	0.0138987	0.817591	0	0.593407
ABCB11	0.624561	0	0	0.527089
ABCB4	0.779188	0.650126	0	0.412314
ABCB5	0.129152	0.593643	0	0.14847
ABCB6	0	0.650126	0	0.86734
ABCB7	0	0	0	0.629144
ABCB8	0	0	0	0
ABCB9	0	0	0	0.382541
ABCC1	0.50083	0	0	0.49451
ABCC10	0.791293	0	0	0.323802
ABCC11	0	0	0	0.23527
ABCC12	0	0	0	0.0033713
ABCC2	0.78332	0	0	0.0834517
ABCC3	0.739734	0.817591	0	0.826809
ABCC4	0	0	0	0.0997387
ABCC5	0.849819	0	0	0.429807
ABCC6	0.9758	0.817591	0	0.486474
ABCC8	0.795595	0	0	0.899856
ABCC9	0.902069	0.817591	0	0.316231
ABCD1	0	0	0	0.282968
ABCD2	0.643332	0	0	0.596626
ABCD3	0	0	0	0.287465
ABCD4	0	0	0	0.192598
ABCE1	0	0	0	0.148064
ABCF1	0.909139	0.752736	0	0.109061
ABCF2	0.679526	0	0	0.693455
ABCF3	0.0309891	0	0	0.140842
ABCG1	0.057254	0	0	0.508125
ABCG2	0.213362	0.993205	0	0.435712
ABCG4	0	0	0	0.526665
ABCG5	0	0	0	0.0957847
ABCG8	0.0114652	0.723706	0	0.837147
ABHD1	0.864256	0.954205	0.935805	0.935805
ABHD10	0	0	0	0.362545
ABHD11	0	0	0	0.0380333
ABHD12	0	0	0	0
ABHD12B	0	0	0	1.4e-06
ABHD13	0	0	0	0
ABHD14A	0	0	0	0.279827
ABHD14A-ACY1	0	0	0	0
ABHD14B	0	0	0	0
ABHD15	0	0	0.956913	0.956913
ABHD16A	0	0	0	0
ABHD16B	0	0	0	0
ABHD17A	0	0	0	0
ABHD17B	0	0	0	0
ABHD17C	0	0	0	0
ABHD18	0	0	0	0
ABHD2	0	0	0	0.285867
ABHD3	0	0	0	0.226566
ABHD4	0	0	0	0.319515
ABHD5	0	0	0	0.232309
ABHD6	0	0	0	0
ABHD8	0	0	0	0
ABI1	0	0	0.996898	0.996898
ABI2	0	0	0	0.754685
ABI3	0	0	0	0.429517
ABI3BP	0	0	0	0.0251706
ABITRAM	0	0	0	0
ABL1	0.117692	0.723706	0.9472	0.0533206
ABL2	0	0	0	0.210185
ABLIM1	0	0	0	0.0005148
ABLIM2	0	0	0	0.466985
ABLIM3	0	0	0	0.404341
ABO	0	0	0	0.49017
ABR	0	0	0	0.0336015
ABRA	0	0	0	0.613995
ABRACL	0	0	0	0
ABRAXAS1	0	0	0	0
ABRAXAS2	0	0	0	0
ABT1	0	0	0	0.429509
ABTB1	0	0	0	0.439403
ABTB2	0.150541	0	0	0.343564
ACAA1	0	0	0	0.332111
ACAA2	0	0	0	0.351188
ACACA	0.825084	0	0	0.0071425
ACACB	0.9631	0.650126	0	0.280893
ACAD10	0	0	0	0.0009131
ACAD11	0.9793	0	0	0.146951
ACAD8	0	0	0	0
ACAD9	0	0	0	0
ACADL	0	0	0	0.589548
ACADM	0	0	0	0.222861
ACADS	0	0	0	0.554564
ACADSB	0	0	0	0
ACADVL	0	0	0	0.473942
ACAN	0.990588	0.904748	0	0.632502
ACAP1	0	0	0	0
ACAP2	0	0	0	0.57517
ACAP3	0.669894	0	0	0.534919
ACAT1	0	0	0	0.721168
ACAT2	0	0	0	0
ACBD3	0	0	0	0.13726
ACBD4	0	0	0	0.769877
ACBD5	0	0	0	0.221966
ACBD6	0	0	0	0.777554
ACBD7	0	0	0	0
ACCS	0.859924	0	0.938098	0.938098
ACCSL	0	0	0	0.877727
ACD	0	0	0	0.0473362
ACE	0.509886	0	0	0.0001826
ACE2	0	0	0	0
ACER1	0	0	0	0.368435
ACER2	0	0	0	0
ACER3	0	0	0	0.18721
ACHE	0	0	0	0.333155
ACIN1	0	0	0	0.271485
ACKR1	0	0	0	0
ACKR2	0	0	0	0
ACKR3	0	0	0	0
ACKR4	0	0	0	0
ACLY	0.507949	0	0	0.318549
ACMSD	0	0	0	0.886741
ACO1	0	0	0	0.0003062
ACO2	0	0	0	0.0447877
ACOD1	0	0	0	0
ACOT1	0	0	0	0.19456
ACOT11	0	0	0	0.756356
ACOT12	0	0	0	0.611891
ACOT13	0	0	0	0
ACOT2	0	0	0	0.490814
ACOT4	0	0	0	0.784097
ACOT6	0	0	0	0
ACOT7	0	0	0	0.508505
ACOT8	0	0	0	0.625919
ACOT9	0	0	0	0
ACOX1	1	0	0	0.70277
ACOX2	0	0	0	0.112432
ACOX3	0	0	0	0.589328
ACOXL	0	0	0	0
ACP1	0	0	0	0.484188
ACP2	0.774571	0.92318	0	0.342766
ACP4	0	0	0	0
ACP5	0	0	0.934	0
ACP6	0	0	0	0.227666
ACP7	0	0	0	0
ACPP	0	0	0	0.593802
ACR	0	0	0	0.482518
ACRBP	0	0	0	0.385559
ACRV1	0.852436	0.92318	0	0.832255
ACSBG1	0.685839	0	0	0.82706
ACSBG2	0	0.92318	0	0.668121
ACSF2	0	0	0	0.28168
ACSF3	0	0	0	0.0676067
ACSL1	0	0	0	0.0290266
ACSL3	0	0	0	0.0624577
ACSL4	0.793487	0.92318	0	0.484813
ACSL5	0	0	0	0.531702
ACSL6	0	0	0	0.552704
ACSM1	0	0	0	0.564786
ACSM2A	0	0	0	0.649351
ACSM2B	0	0	0	0.185114
ACSM3	0	0	0	0.0586724
ACSM4	0	0	0	0.146567
ACSM5	0.949947	0.817591	0	0.895385
ACSM6	0	0	0	0
ACSS1	0	0	0	0.0836355
ACSS2	0	0	0	0.109821
ACSS3	0	0	0	0.125013
ACTA1	0	0	0.8873	0
ACTA2	0	0	0	0
ACTB	0.951187	0.723706	0.7808	0.790148
ACTBL2	0	0	0	0.611982
ACTC1	0	0	0.9269	0.507764
ACTG1	0	0	0.7582	0.509958
ACTG2	0	0	0	0
ACTL10	0	0	0	0
ACTL6A	0	0	0	0
ACTL6B	0	0	0	0.62825
ACTL7A	0.000506807	0	0	0.654051
ACTL7B	0	0	0	0.34909
ACTL8	0	0	0	0.726415
ACTL9	0	0	0	0
ACTN1	0	0	0.8562	0.0292629
ACTN2	0.981062	0.593643	0.7582	0.79302
ACTN3	0	0	0	0
ACTN4	0.910512	0	0	0.29541
ACTR10	0	0	0	0
ACTR1A	0	0	0.7351	0
ACTR1B	0	0	0	0
ACTR2	0	0	0	0
ACTR3	0	0	0	0.793247
ACTR3B	0	0	0	0.211793
ACTR3C	0	0	0	0
ACTR5	0	0	0	0.41098
ACTR6	0	0	0	0
ACTR8	0	0	0	0.364013
ACTRT1	0	0	0	0.822406
ACTRT2	0	0	0	0.232771
ACTRT3	0	0	0	0
ACVR1	0	0	0.9076	0.522571
ACVR1B	0.995673	0	0.9421	0.811753
ACVR1C	0	0	0	0.364352
ACVR2A	0	0	0	0.235731
ACVR2B	0.278166	0.92318	0.9257	0.550778
ACVRL1	0	0	0	0.198417
ACY1	0	0	0	0.361724
ACY3	0	0	0	0
ACYP1	0	0	0	0
ACYP2	0	0	0	0
ADA	0	0	0	0
ADA2	0	0	0	0
ADAD1	0	0	0	0.758943
ADAD2	0	0	0	0.167175
ADAL	0	0	0	0.291629
ADAM10	0	0	0	0.0860641
ADAM11	0.95829	0.752736	0	0.848463
ADAM12	0	0	0.9911	0
ADAM15	0.414228	0	0	0.218274
ADAM17	0	0	0	0.76573
ADAM18	0	0	0	0.167737
ADAM19	0.34353	0.70741	0.978987	0.978987
ADAM2	0	0	0	0.0609027
ADAM20	0.00871692	0.92318	0	0.250615
ADAM21	0	0	0	0.0635965
ADAM22	0.28243	0.650126	0	0.589018
ADAM23	0	0	0	0.0461944
ADAM28	0	0	0	0.519315
ADAM29	0	0	0	0.191733
ADAM30	0.737872	0	0	0.0029799
ADAM32	0	0	0	0.694425
ADAM33	0	0	0	0.316873
ADAM7	0.14462	0	0	0.647678
ADAM8	0	0	0	0.019331
ADAM9	0.466431	0.817591	0.946238	0.946238
ADAMDEC1	0	0	0	0
ADAMTS1	0	0	0	0.001242
ADAMTS10	0	0	0	0.0053975
ADAMTS12	0.569659	0.650126	0	0.145369
ADAMTS13	0.154856	0.650126	0	0.330958
ADAMTS14	0	0	0	0.156365
ADAMTS15	0.775741	0	0	0.282026
ADAMTS16	0.0941689	0	0	0.627255
ADAMTS17	0	0	0	0.028957
ADAMTS18	0.7922	0	0	0.475916
ADAMTS19	0.576388	0.723706	0	0.17631
ADAMTS2	0.586655	0.487718	0	0.676036
ADAMTS20	0.258029	0	0	0.665556
ADAMTS3	0	0	0	0.316494
ADAMTS4	0	0	0	0.0483812
ADAMTS5	0.828012	0.888495	0	0.102095
ADAMTS6	0.9471	0	0	0.447167
ADAMTS7	0.333616	0	0	0.0415206
ADAMTS8	0	0	0	0.101792
ADAMTS9	0.640804	0	0	0.0956327
ADAMTSL1	0.0821457	0.723706	0	0.173628
ADAMTSL2	0	0	0	0.473534
ADAMTSL3	0.253172	0.697003	0	0.475725
ADAMTSL4	0.203805	0	0	0.0547166
ADAMTSL5	0	0	0	0.564358
ADAP1	0	0	0	0.640462
ADAP2	0	0	0	0
ADAR	0	0	0	0.012253
ADARB1	0	0	0	0.262105
ADARB2	0	0	0	0.749236
ADAT1	0	0	0	0.204619
ADAT2	0	0	0	0
ADAT3	0	0	0	0.0557117
ADCK1	0	0	0	0.000491
ADCK2	0	0	0	0
ADCK5	0	0	0	0.122754
ADCY1	0.996231	0	0	0.0934003
ADCY10	0.362365	0	0	0.66472
ADCY2	0.0865105	0.549888	0	0.641396
ADCY3	0	0	0	0.310723
ADCY4	0	0.549888	0	0.75872
ADCY5	0.7523	0	0	0.351987
ADCY6	0.61805	0	0	0.711127
ADCY7	0	0	0	0.463928
ADCY8	0.347161	0.650126	0	0.440873
ADCY9	0.694338	0.817591	0	0.368136
ADCYAP1	0	0	0	0
ADCYAP1R1	0	0	0	0.0461184
ADD1	0	0	0	0.144659
ADD2	0.549555	0	0	0.0004765
ADD3	0	0	0	0
ADGB	0	0	0	0
ADGRA1	0	0	0	0
ADGRA2	0	0	0	0
ADGRA3	0	0	0	0
ADGRB1	0	0	0	0
ADGRB2	0	0	0	0
ADGRB3	0	0	0	0
ADGRD1	0	0	0	0
ADGRD2	0	0	0	0
ADGRE1	0	0	0	0
ADGRE2	0	0	0	0
ADGRE3	0	0	0	0
ADGRE5	0	0	0	0
ADGRF1	0	0	0	0
ADGRF2	0	0	0	0
ADGRF3	0	0	0	0
ADGRF4	0	0	0	0
ADGRF5	0	0	0	0
ADGRG1	0	0	0	0
ADGRG2	0	0	0	0
ADGRG3	0	0	0	0
ADGRG4	0	0	0	0
ADGRG5	0	0	0	0
ADGRG6	0	0	0	0
ADGRG7	0	0	0	0
ADGRL1	0	0	0	0
ADGRL2	0	0	0	0
ADGRL3	0	0	0	0
ADGRL4	0	0	0	0
ADGRV1	0	0	0	0
ADH1A	0.933995	0.954205	0	0.810987
ADH1B	0	0	0	0.262507
ADH1C	0	0	0	0.543899
ADH4	0	0	0	0.777626
ADH5	0	0	0	0
ADH6	0	0	0	0.0549617
ADH7	0	0	0	0
ADHFE1	0	0	0	0
ADI1	0	0	0	0.838762
ADIG	0	0	0	0
ADIPOQ	0	0	0	0.466202
ADIPOR1	0	0	0	0.776722
ADIPOR2	0	0	0	0.281193
ADIRF	0	0	0	0
ADK	0	0	0	0.688608
ADM	0	0	0	0
ADM2	0	0	0	0
ADM5	0	0	0	0
ADNP	0	0	0	0.17177
ADNP2	0.723587	0	0	0.494364
ADO	0	0	0	0.425977
ADORA1	0	0	0	0
ADORA2A	0	0	0	0.233742
ADORA2B	0	0.954205	0	0.791108
ADORA3	0	0	0	0.22258
ADPGK	0	0	0	0
ADPRH	0	0	0	0
ADPRHL1	0	0	0	0
ADPRHL2	0	0	0	0
ADPRM	0	0	0	0
ADRA1A	0.485298	0	0	0.617623
ADRA1B	0	0	0.9648	0.162258
ADRA1D	0	0	0	0.405496
ADRA2A	0	0	0	0.230646
ADRA2B	0	0	0	0.112902
ADRA2C	0	0	0	0
ADRB1	0	0	0	0.573011
ADRB2	0	0	0	0
ADRB3	0	0	0	0.411677
ADRM1	0.669721	0	0	0.820901
ADSL	0	0	0	0.867244
ADSS	0	0	0	0.131876
ADSSL1	0	0	0	0
ADTRP	0	0	0	0
AEBP1	0.140993	0	0	0.272362
AEBP2	0	0	0	0.116676
AEN	0	0	0	0
AES	0	0	0.772	0
AFAP1	0	0	0	0
AFAP1L1	0.620537	0	0	0.371967
AFAP1L2	0	0	0	0.170512
AFDN	0	0	0	0
AFF1	0	0	0	0.094732
AFF2	0.802482	0.446343	0	0.509196
AFF3	0.786137	0	0	0.708079
AFF4	0	0	0	0.0311743
AFG1L	0	0	0	0
AFG3L2	0	0	0	0.0309564
AFM	0	0	0	0.779559
AFMID	0	0	0	0
AFP	0.199165	0.92318	0	0.605356
AFTPH	0	0	0	0.0027305
AGA	0	0	0	0.207222
AGAP1	0	0	0	0
AGAP11	0	0	0	0
AGAP2	0	0	0.9887	0
AGAP3	0	0	0	0
AGAP4	0	0	0	0
AGAP5	0	0	0	0
AGAP6	0	0	0	0
AGAP9	0	0	0	0
AGBL1	0.396557	0	0	0.57082
AGBL2	0	0	0	0.515651
AGBL3	0	0	0	0
AGBL4	0	0	0	0
AGBL5	0	0	0	0.133708
AGER	0	0	0	0.120578
AGFG1	0	0	0	0
AGFG2	0	0	0	0
AGGF1	0	0	0	0.714105
AGK	0	0	0	0
AGL	0.8727	0	0	0.0648484
AGMAT	0	0	0	0.305981
AGMO	0	0	0	0
AGO1	0	0	0	0
AGO2	0	0	0	0
AGO3	0	0	0	0
AGO4	0	0	0	0
AGPAT1	0.66126	0.963665	0	0.671426
AGPAT2	0	0	0	0.874733
AGPAT3	0	0	0	0
AGPAT4	0	0	0	0.443066
AGPAT5	0	0	0	0.254426
AGPS	0	0	0	0.19387
AGR2	0	0	0	0
AGR3	0	0	0	0
AGRN	0.278704	0	0	0.771428
AGRP	0	0	0.91602	0.91602
AGT	0.119638	0.92318	0	0.527007
AGTPBP1	0.950846	0	0	0.663645
AGTR1	0	0	0.993	0.658341
AGTR2	0	0	0	0.703681
AGTRAP	0	0	0	0
AGXT	0	0	0	0
AGXT2	0	0	0	0.164649
AHCTF1	0.793957	0	0	0.333947
AHCY	0.305736	0	0	0.8793
AHCYL1	0	0	0	0.722494
AHCYL2	0	0	0	0.462411
AHDC1	0.10681	0	0	0.405532
AHI1	0	0	0	0.0646621
AHNAK	0.878145	0	0.993	2.1e-06
AHNAK2	0	0	0	0.0045714
AHR	0	0	0.9536	0.0993961
AHRR	0	0	0	0.0530589
AHSA1	0	0	0	0
AHSG	0	0	0	0
AHSP	0	0	0	0
AICDA	0	0	0	0.587282
AIDA	0	0	0	0
AIF1	0	0	0	0
AIF1L	0	0	0	0
AIFM1	0	0	0	0.467829
AIFM2	0	0	0	0
AIFM3	0	0	0	0.0864908
AIG1	0	0	0	0.468892
AIM2	0	0	0	0
AIMP1	0	0	0	0.344348
AIMP2	0	0	0	0
AIP	0	0	0	0.045236
AIPL1	0	0	0	0.366345
AIRE	0	0	0	0
AJAP1	0	0	0	0
AJM1	0	0	0	0
AJUBA	0	0	0	0
AK1	0	0	0	0
AK2	0	0	0	0
AK3	0	0	0	0.703378
AK4	0	0	0	0
AK5	0	0	0	0
AK6	0	0	0	0
AK7	0	0	0	0
AK8	0	0	0	0
AK9	0	0	0	0
AKAIN1	0	0	0	0
AKAP1	0	0	0	0.0664923
AKAP10	0	0	0	0
AKAP11	0.329886	0	0	0.050632
AKAP12	0	0	0	0.0966892
AKAP13	0.306645	0	0.9891	0.523538
AKAP14	0	0	0	0.563445
AKAP17A	0	0	0	0
AKAP2	0	0	0	0
AKAP3	0.301192	0.650126	0	0.558869
AKAP4	0	0	0	0.588324
AKAP5	0	0	0	0
AKAP6	0.333	0	0	0.29243
AKAP7	0.0637827	0	0	0.488665
AKAP8	0.468227	0	0	0.258921
AKAP8L	0	0	0	0.538374
AKAP9	0.423589	0	0.7569	0.795437
AKIP1	0	0	0	0
AKIRIN1	0	0	0	0.494918
AKIRIN2	0	0	0	0.813341
AKNA	0	0	0	0.0903096
AKNAD1	0	0	0	0.765185
AKR1A1	0	0.92318	0	0.848141
AKR1B1	0	0	0	0
AKR1B10	0	0	0	0
AKR1B15	0	0	0	0.36175
AKR1C1	0	0	0	0
AKR1C2	0	0	0	0
AKR1C3	0	0	0	0
AKR1C4	0	0	0	0.380633
AKR1D1	0	0	0	0
AKR1E2	0	0	0	0.350824
AKR7A2	0	0	0	0
AKR7A3	0	0	0	0
AKR7L	0	0	0	0
AKT1	0.528911	0.92318	0.999563	0.999563
AKT1S1	0	0	0	0.469456
AKT2	0	0	0.8506	0.778523
AKT3	0.399529	0	0	0.74023
AKTIP	0	0	0	0
ALAD	0	0	0	0
ALAS1	0	0	0	0.179213
ALAS2	0	0	0	0.188119
ALB	0	0	0	0
ALCAM	0.540055	0	0	0.104831
ALDH16A1	0	0	0	0.0610705
ALDH18A1	0.543352	0	0	0.389508
ALDH1A1	0	0	0	0
ALDH1A2	0	0	0	0
ALDH1A3	0	0	0	0.794703
ALDH1B1	0.283921	0	0	0.353093
ALDH1L1	0.8457	0	0	0.849298
ALDH1L2	0.363891	0	0	0.0883245
ALDH2	0	0	0	0.666674
ALDH3A1	0	0	0	0.543991
ALDH3A2	0	0	0	0.224529
ALDH3B1	0	0	0	0.513404
ALDH3B2	0	0	0	0
ALDH4A1	0	0	0.985	0.163276
ALDH5A1	0.807958	0	0	0.451743
ALDH6A1	0	0	0.9756	0.462185
ALDH7A1	0.8727	0	0	0.528809
ALDH8A1	0.544202	0	0	0.785534
ALDH9A1	0	0	0	0.685618
ALDOA	0	0	0	0
ALDOB	0.636191	0	0	0.801846
ALDOC	0	0	0	0.212065
ALG1	0	0	0	0.817164
ALG10	0	0	0	0.0147399
ALG10B	0	0	0	0.0043314
ALG11	0	0	0	0
ALG12	0	0	0	0.401411
ALG13	0	0	0.904708	0.904708
ALG14	0	0	0	0
ALG1L	0	0	0	0
ALG1L2	0	0	0	0
ALG2	0.980357	0	0	0.442362
ALG3	0	0	0	0.236657
ALG5	0	0	0	0
ALG6	0	0	0.927406	0.927406
ALG8	0	0	0	0.663318
ALG9	0	0	0	0.109709
ALK	0	0	0	0.526918
ALKAL1	0	0	0	0
ALKAL2	0	0	0	0
ALKBH1	0	0	0	0
ALKBH2	0	0	0	0
ALKBH3	0	0	0	0.479872
ALKBH4	0	0	0	0.372696
ALKBH5	0	0	0	0
ALKBH6	0	0	0	0
ALKBH7	0	0	0	0
ALKBH8	0	0	0	0
ALLC	0	0	0	0.242985
ALMS1	0.141238	0.43056	0.729	0.0061337
ALOX12	0	0	0	0
ALOX12B	0	0	0	0.220638
ALOX15	0.504196	0	0	0.683994
ALOX15B	0	0	0	0
ALOX5	0	0	0	0.056818
ALOX5AP	0	0	0	0
ALOXE3	0	0	0	0.736616
ALPG	0	0	0	0
ALPI	0	0	0	0
ALPK1	0	0	0	0.0675145
ALPK2	0.157064	0	0	0.0360027
ALPK3	0.361495	0	0	0.204056
ALPL	0	0	0	0.268161
ALPP	0	0	0.958148	0.958148
ALS2	0	0	0	0.108952
ALS2CL	0.3606	0	0	0.428638
ALS2CR12	0	0	0	0
ALX1	0.176706	0	0	0.820133
ALX3	0	0	0	0
ALX4	0	0	0	0
ALYREF	0	0	0	0
AMACR	0	0	0	0.433879
AMBN	0	0	0	0.649354
AMBP	0	0	0	0
AMBRA1	0	0	0	0.728159
AMD1	0	0	0	0
AMDHD1	0.950005	0	0	0.609476
AMDHD2	0	0	0	0.32568
AMELX	0	0	0	0.453157
AMELY	0	0	0	0
AMER1	0	0	0	0
AMER2	0	0	0	0
AMER3	0	0	0	0
AMFR	0	0	0	0.432015
AMH	0	0	0	0
AMHR2	0	0	0	0.507434
AMIGO1	0	0	0	0
AMIGO2	0	0.967353	0.993616	0.993616
AMIGO3	0	0	0	0.0167809
AMMECR1	0.631488	0	0	0.688379
AMMECR1L	0	0	0	0.722125
AMN	0	0	0	0
AMN1	0	0	0	0.441328
AMOT	0	0	0	0.204728
AMOTL1	0	0	0	0.556677
AMOTL2	0.599359	0.817591	0	0.654375
AMPD1	0.809257	0	0	0.665767
AMPD2	0	0	0	0.56663
AMPD3	0.391539	0	0	0.390505
AMPH	0	0	0	0.189365
AMT	0	0	0	0.139208
AMTN	0	0	0	0
AMY1A	0	0	0	0.0096795
AMY1B	0	0	0	0
AMY1C	0	0	0	0
AMY2A	0	0	0	0
AMY2B	0	0	0	0.272733
AMZ1	0.353893	0.92318	0	0.62681
AMZ2	0	0	0	0
ANAPC1	0	0	0	0.0012361
ANAPC10	0	0	0	0.528918
ANAPC11	0	0	0	0.876773
ANAPC13	0	0	0.918992	0.918992
ANAPC15	0	0	0	0
ANAPC16	0	0	0	0.747572
ANAPC2	0	0	0	0.583128
ANAPC4	0	0	0	0.536645
ANAPC5	0	0	0.7369	0
ANAPC7	0	0	0.7304	0
ANG	0	0	0	0
ANGEL1	0	0	0	0.160505
ANGEL2	0	0	0	0.685025
ANGPT1	0	0	0.8205	0.737809
ANGPT2	0	0	0.9257	0
ANGPT4	0	0	0	0.196454
ANGPTL1	0	0	0	0.479034
ANGPTL2	0	0	0	0.139954
ANGPTL3	0	0	0	0.147691
ANGPTL4	0	0	0	0.272304
ANGPTL5	0	0	0	0.25603
ANGPTL6	0	0	0	0.103571
ANGPTL7	0	0	0	0
ANGPTL8	0	0	0	0
ANHX	0	0	0	0
ANK1	0	0.549888	0	0.346123
ANK2	0.100886	0	0	0.0001473
ANK3	0.202652	0.650126	0	0.79699
ANKAR	0	0	0	0.0076672
ANKDD1A	0	0	0	0.501111
ANKDD1B	0	0	0	0
ANKEF1	0	0	0	0
ANKFN1	0	0	0	0
ANKFY1	0	0	0	0.633602
ANKH	0	0	0	0
ANKHD1	0.479364	0	0	0.176384
ANKHD1-EIF4EBP3	0	0	0	0
ANKIB1	0	0.723706	0.90076	0.90076
ANKK1	0.503275	0.92318	0	0.407803
ANKLE1	0	0	0	0.0938957
ANKLE2	0	0	0	0.0748329
ANKMY1	0	0	0	0.0024482
ANKMY2	0	0	0	0.302097
ANKRA2	0	0	0	0.33639
ANKRD1	0	0	0	0.770208
ANKRD10	0	0	0	0
ANKRD11	0.461548	0	0	0.772617
ANKRD12	0.431912	0	0	0.399007
ANKRD13A	0	0	0	0.160002
ANKRD13B	0	0	0	0.408868
ANKRD13C	0	0	0	0
ANKRD13D	0	0	0	0
ANKRD16	0	0	0	0.863475
ANKRD17	0	0	0	1.4e-06
ANKRD18A	0	0	0	0.258097
ANKRD18B	0	0	0	0
ANKRD2	0	0	0	0.69232
ANKRD20A1	0	0	0	0
ANKRD20A2	0	0	0	0
ANKRD20A3	0	0	0	0
ANKRD20A4	0	0	0	0
ANKRD22	0.152535	0	0	0.747383
ANKRD23	0	0	0	0
ANKRD24	0	0	0	0.254598
ANKRD26	0.9236	0	0	0.433467
ANKRD27	0	0	0	0.32816
ANKRD28	0	0	0	0.411083
ANKRD29	0	0	0	0
ANKRD30A	0.440395	0	0	0.828562
ANKRD30B	0	0	0	0.491314
ANKRD30BL	0	0	0	0
ANKRD31	0	0	0	0.526894
ANKRD33	0	0	0	0
ANKRD33B	0	0	0	0.192515
ANKRD34A	0	0	0	0.273242
ANKRD34B	0	0	0	0.388256
ANKRD34C	0	0	0	0.533633
ANKRD35	0	0	0	0.430175
ANKRD36	0	0.817591	0	0.0614611
ANKRD36B	0	0	0	0
ANKRD36C	0	0	0	0
ANKRD37	0	0	0	0
ANKRD39	0	0	0	0
ANKRD40	0	0	0	0
ANKRD40CL	0	0	0	0
ANKRD42	0	0	0	0.417617
ANKRD44	0	0	0	0.595507
ANKRD45	0.171317	0.993205	0	0.866177
ANKRD46	0	0	0	0.653047
ANKRD49	0	0	0	0
ANKRD50	0	0	0	0.0706006
ANKRD52	0.655133	0	0	0.000426
ANKRD53	0	0	0	0
ANKRD54	0	0	0	0.755548
ANKRD55	0	0	0	0.269998
ANKRD6	0	0	0	0.121466
ANKRD60	0	0	0	0
ANKRD61	0	0	0	0
ANKRD62	0	0	0	0
ANKRD63	0	0	0	0
ANKRD65	0	0	0	0
ANKRD66	0	0	0	0
ANKRD7	0	0	0	0
ANKRD9	0	0	0	0.374221
ANKS1A	0	0	0	0
ANKS1B	0	0	0	0.101973
ANKS3	0	0	0	0.411777
ANKS4B	0	0	0	0.405069
ANKS6	0	0	0	0.269141
ANKUB1	0	0	0	0
ANKZF1	0	0	0	0.694251
ANLN	0	0	0	0
ANO1	0	0	0	0.392298
ANO10	0	0	0	0
ANO2	0.0292194	0	0	0.736805
ANO3	0	0	0	0.0016714
ANO4	0.954654	0.709285	0	0.890124
ANO5	0.93703	0	0	0.171257
ANO6	0	0	0	0.229096
ANO7	0	0	0	0.0812932
ANO8	0.427799	0.650126	0	0.0374088
ANO9	0	0	0	0.880756
ANOS1	0	0	0	0
ANP32A	0	0	0.9891	0.467151
ANP32B	0	0	0	0
ANP32C	0	0	0	0
ANP32D	0	0	0	0
ANP32E	0	0	0	0.229756
ANPEP	0.402781	0	0	0.366098
ANTXR1	0	0	0	0.273431
ANTXR2	0	0	0	0.149211
ANTXRL	0	0	0	0
ANXA1	0	0	0.9648	0.507587
ANXA10	0	0	0	0
ANXA11	0	0	0	0.597364
ANXA13	0	0	0	0.382864
ANXA2	0	0	0	0.456759
ANXA2R	0	0	0	0
ANXA3	0	0	0	0
ANXA4	0	0	0	0.267848
ANXA5	0	0	0	0.348519
ANXA6	0	0	0	0.02666
ANXA7	0	0	0	0.211397
ANXA8	0	0	0	0
ANXA8L1	0	0	0	0
ANXA9	0	0	0	0.203357
AOAH	0	0.92318	0	0.455998
AOC1	0	0	0	0
AOC2	0	0	0	0
AOC3	0.0989613	0.993205	0	0.356715
AOPEP	0	0	0	0
AOX1	0	0	0	0.156619
AP1AR	0	0	0	0.471107
AP1B1	0.437271	0	0.9316	0.21175
AP1G1	0	0	0.9494	0.737541
AP1G2	0	0	0	0.445669
AP1M1	0	0	0	0
AP1M2	0	0	0	0
AP1S1	0	0	0	0
AP1S2	0	0	0	0
AP1S3	0	0	0	0
AP2A1	0	0	0	0.711911
AP2A2	0.180862	0	0	0.640911
AP2B1	0.619616	0	0.7882	0.263708
AP2M1	0	0	0	0.29892
AP2S1	0	0	0	0
AP3B1	0	0	0	0.0134415
AP3B2	0	0	0	0.0812422
AP3D1	0.361713	0.92318	0	0.0611596
AP3M1	0	0	0	0.644126
AP3M2	0	0	0	0
AP3S1	0	0	0	0
AP3S2	0	0	0	0
AP4B1	0	0	0	0.156611
AP4E1	0.474698	0	0	0.19198
AP4M1	0	0	0	0.724657
AP4S1	0	0	0	0.513257
AP5B1	0	0	0	0
AP5M1	0	0	0	0
AP5S1	0	0	0	0
AP5Z1	0	0	0	0
APAF1	0	0	0	0.509486
APBA1	0	0	0.9173	0.0002018
APBA2	0.939292	0.723706	0	0.788987
APBA3	0	0	0	0.440176
APBB1	0.71344	0	0	0.332635
APBB1IP	0	0	0	0.2326
APBB2	0	0	0.993	0
APBB3	0	0	0	0
APC	0.0262908	0.70741	0.9958	0.557748
APC2	0	0	0	0.0001904
APCDD1	0	0	0	0.177709
APCDD1L	0	0	0	0.317262
APCS	0	0	0	0.735974
APEH	0	0	0	0.844753
APELA	0	0	0	0
APEX1	0.997111	0.723706	0.999135	0.999135
APEX2	0	0	0	0.554589
APH1A	0	0	0	0.0401519
APH1B	0	0	0	0.780962
API5	0	0	0	0.0734404
APIP	0	0	0	0
APLF	0.640031	0	0	0.453686
APLN	0	0	0	0.797167
APLNR	0	0	0	0.487702
APLP1	0	0	0.8506	0.475713
APLP2	0	0	0.9576	0.171847
APMAP	0	0	0	0
APOA1	0	0	0.9683	0
APOA2	0	0	0.9003	0.685532
APOA4	0	0	0	0.666402
APOA5	0	0	0	0.813659
APOB	0.67082	0	0	0.0140834
APOBEC1	0	0	0	0
APOBEC2	0	0	0	0.449155
APOBEC3A	0	0	0	0
APOBEC3A_B	0	0	0	0
APOBEC3B	0	0	0	0.299329
APOBEC3C	0	0	0	0
APOBEC3D	0	0	0	0
APOBEC3F	0	0	0	0.176962
APOBEC3G	0	0	0	0.305332
APOBEC3H	0	0	0	0.734054
APOBEC4	0	0	0	0.293423
APOBR	0	0	0	0
APOC1	0	0	0	0.836956
APOC2	0	0	0	0
APOC3	0	0	0	0
APOC4	0	0	0	0
APOD	0	0	0	0
APOE	0	0	0	0
APOF	0	0	0.919687	0.919687
APOH	0	0	0	0.326166
APOL1	0	0	0	0.369491
APOL2	0	0	0	0.728985
APOL3	0	0	0	0.222352
APOL4	0	0	0	0
APOL5	0	0	0	0.138458
APOL6	0	0	0	0
APOLD1	0	0	0	0
APOM	0	0	0	0
APOO	0.766136	0	0	0.753165
APOOL	0	0	0	0.236468
APOPT1	0	0	0	0
APP	0	0	0.9535	0.31309
APPBP2	0.9879	0	0.926825	0.926825
APPL1	0.599547	0	0.9929	0.548472
APPL2	0.657638	0.954205	0	0.490152
APRT	0.972108	0.92318	0	0.82749
APTX	0	0	0	0.732021
AQP1	0	0	0	2.3e-06
AQP10	0	0	0	0.347053
AQP11	0	0	0	0
AQP12A	0	0	0	0
AQP12B	0	0	0	0
AQP2	0	0	0	0
AQP3	0	0	0	0
AQP4	0	0	0	0
AQP5	0.982176	0	0	0.683512
AQP6	0	0	0	0
AQP7	0	0	0	0
AQP8	0	0	0	0
AQP9	0	0	0	0
AQR	0.974	0	0	0.0914112
AR	0.971161	0	0.9986	0.727388
ARAF	0	0	0.8586	0.387247
ARAP1	0.613441	0	0	0.310708
ARAP2	0.264233	0.954205	0	0.0963898
ARAP3	0.738221	0	0	0.477935
ARC	0	0	0	0
ARCN1	0	0	0	0.175638
AREG	0	0	0	0
AREL1	0	0	0	0
ARF1	0.967971	0	0	0.768321
ARF3	0	0	0	0
ARF4	0	0	0	0
ARF5	0	0	0	0
ARF6	0	0	0.9269	0
ARFGAP1	0	0	0.9088	0
ARFGAP2	0	0	0	0.119731
ARFGAP3	0	0	0	0.495584
ARFGEF1	0.562323	0	0.918137	0.918137
ARFGEF2	0.891064	0.515402	0	0.229312
ARFGEF3	0	0	0	0
ARFIP1	0	0	0	0
ARFIP2	0	0	0	0.0002055
ARFRP1	0.2347	0	0	3e-07
ARG1	0	0	0	0.388484
ARG2	0	0	0	0
ARGFX	0	0	0	0.894972
ARGLU1	0	0	0	0.375222
ARHGAP1	0	0	0.9996	0
ARHGAP10	0	0	0	0.0327438
ARHGAP11A	0	0	0	0.212896
ARHGAP11B	0	0	0	0
ARHGAP12	0	0	0	0.543242
ARHGAP15	0	0	0	0.192928
ARHGAP17	0	0	0	0
ARHGAP18	0	0	0.928524	0.928524
ARHGAP19	0	0	0	0.291009
ARHGAP20	0	0	0	0.0692842
ARHGAP21	0	0	0	0.0755477
ARHGAP22	0	0	0	0.357848
ARHGAP23	0	0	0	0.0449882
ARHGAP24	0	0	0	0.0359969
ARHGAP25	0	0.954205	0	0.0352665
ARHGAP26	0	0	0	0.0799165
ARHGAP27	0	0	0	0
ARHGAP28	0	0	0	0.11322
ARHGAP29	0	0	0	0.458791
ARHGAP30	0	0	0	0.245393
ARHGAP31	0.634237	0	0	0.172227
ARHGAP32	0	0	0	0.0003692
ARHGAP33	0	0	0	0.0091691
ARHGAP35	0.952905	0	0	0
ARHGAP36	0.563119	0	0	0.339889
ARHGAP39	0	0	0	0.0036003
ARHGAP4	0.778745	0.723706	0.928255	0.928255
ARHGAP40	0	0	0	0.224595
ARHGAP42	0	0.967353	0	0.776941
ARHGAP44	0	0	0	0
ARHGAP45	0	0	0	0
ARHGAP5	0.612151	0	0	0.614985
ARHGAP6	0	0	0.966347	0.966347
ARHGAP8	0	0	0	0
ARHGAP9	0.333312	0	0	0.422143
ARHGDIA	0	0	0.8918	0.802108
ARHGDIB	0	0	0	0
ARHGDIG	0	0	0	0
ARHGEF1	0.0274585	0	0.9779	0.18287
ARHGEF10	0.192353	0.817591	0	0.378828
ARHGEF10L	0	0	0	0.0381015
ARHGEF11	0.647311	0.870619	0.9959	0.0445004
ARHGEF12	0	0	0.9716	0.591732
ARHGEF15	0	0	0	0.0928406
ARHGEF16	0	0	0	0.156354
ARHGEF17	0.539682	0	0	0.46305
ARHGEF18	0	0	0	0.179794
ARHGEF19	0.169405	0	0	0.736603
ARHGEF2	0	0	0.9173	0.221198
ARHGEF25	0	0.92318	0	0
ARHGEF26	0	0	0	0
ARHGEF28	0	0	0	0
ARHGEF3	0	0	0	0
ARHGEF33	0	0	0	0.25333
ARHGEF35	0	0	0	0
ARHGEF37	0	0	0	0
ARHGEF38	0.9507	0	0	0.996865
ARHGEF39	0	0	0	0
ARHGEF4	0	0	0	0.0444166
ARHGEF40	0	0	0	0
ARHGEF5	0	0	0	0.0218063
ARHGEF6	0	0	0	0.648051
ARHGEF7	0	0	0	0.298841
ARHGEF9	0	0	0	0.27734
ARID1A	0.893138	0.531661	1	1
ARID1B	0.00495673	0	0	0.0661922
ARID2	0	0	0	0.235001
ARID3A	0	0	0.9648	0
ARID3B	0	0	0	0.364434
ARID3C	0	0	0	0.622273
ARID4A	0	0	0	0.345394
ARID4B	0	0	0	0.0379777
ARID5A	0	0	0	0.448138
ARID5B	0	0	0	0.61376
ARIH1	0	0	0	0.186496
ARIH2	0	0	0	0.228637
ARIH2OS	0	0	0	0
ARL1	0	0	0	0
ARL10	0	0	0	0
ARL11	0	0	0	0
ARL13A	0	0.92318	0	0.688003
ARL13B	0	0	0	0
ARL14	0	0	0	0
ARL14EP	0	0	0	0
ARL14EPL	0	0	0	0
ARL15	0	0	0	0
ARL16	0	0	0	0.451188
ARL17A	0	0	0	0
ARL17B	0	0	0	0
ARL2	0	0	0	0
ARL2BP	0	0	0	0
ARL3	1	0	0	0.781761
ARL4A	0	0	0	0
ARL4C	0	0	0	0
ARL4D	0	0	0.8918	0.490466
ARL5A	0	0	0	0
ARL5B	0	0	0	0
ARL5C	0	0	0	0
ARL6	0	0.954205	0.966412	0.966412
ARL6IP1	0	0	0	0
ARL6IP4	0	0	0	0
ARL6IP5	0	0	0	0
ARL6IP6	0	0	0	0
ARL8A	0	0	0	0
ARL8B	0	0	0	0
ARL9	0	0	0	0
ARMC1	0	0	0	0.476479
ARMC10	0.132262	0	0	0.845293
ARMC12	0	0	0	0
ARMC2	0.608793	0.888495	0	0.818079
ARMC3	0	0	0	0.0494945
ARMC4	0.440084	0.817591	0	0.391136
ARMC5	0	0	0	0
ARMC6	0	0	0	0.261956
ARMC7	0	0	0	0.442925
ARMC8	0.80691	0.817591	0.959269	0.959269
ARMC9	0	0	0	0.192297
ARMCX1	0	0	0	0.0490711
ARMCX2	0.490571	0	0	0.662171
ARMCX3	0	0	0	0.273074
ARMCX4	0	0	0	0
ARMCX5	0	0	0	0.0989599
ARMCX5-GPRASP2	0	0	0	0
ARMCX6	0	0	0	0
ARMH1	0	0	0	0
ARMH2	0	0	0	0
ARMH3	0	0	0	0
ARMH4	0	0	0	0
ARMS2	0	0	0	0
ARMT1	0	0	0	0
ARNT	0.760878	0	0.771	0.515889
ARNT2	0	0	0	0
ARNTL	0	0	0	0
ARNTL2	0	0	0	0
ARPC1A	0	0	0	0
ARPC1B	0	0	0	0.546952
ARPC2	0	0	0	0
ARPC3	0	0	0	0
ARPC4	0	0	0	0
ARPC4-TTLL3	0	0	0	0
ARPC5	0.513208	0.92318	0	0.63279
ARPC5L	0	0	0	0
ARPIN	0	0	0	0
ARPIN-AP3S2	0	0	0	0
ARPP19	0	0	0	0.749127
ARPP21	0.86946	0	0	0.403367
ARR3	0	0	0.8586	0.273672
ARRB1	0	0	0.9658	0
ARRB2	0	0	0.8202	0.378723
ARRDC1	0	0	0	0.403715
ARRDC2	0.220922	0	0	0.600303
ARRDC3	0	0	0	0
ARRDC4	0	0	0	0.25957
ARRDC5	0	0	0	0.434318
ARSA	0	0	0	0
ARSB	0	0	0	0
ARSD	0	0	0	0.263068
ARSE	0	0	0	0.169017
ARSF	0	0	0	0.0157266
ARSG	0	0	0	0.34362
ARSH	0	0	0	0.142042
ARSI	0.6532	0	0	0.748327
ARSJ	0.8313	0	0	0.487713
ARSK	0	0	0	0.643346
ART1	0	0	0	0.370723
ART3	0	0	0	0.340549
ART4	0	0	0	0
ART5	0	0	0	0
ARTN	0	0	0	0.534537
ARV1	0	0	0	0
ARVCF	0	0	0	0.0743939
ARX	0	0	0	0.570182
AS3MT	0	0	0	0
ASAH1	0	0	0	0.0325541
ASAH2	0	0	0	0.221974
ASAH2B	0	0	0	0
ASAP1	0	0	0	0.0302289
ASAP2	0.797575	0.817591	0	0.67704
ASAP3	0.120417	0	0	0.683137
ASB1	0	0	0	0.274806
ASB10	0	0	0	0.0074933
ASB11	0.925505	0	0.94236	0.94236
ASB12	0	0	0	0
ASB13	0	0	0	0.511636
ASB14	0	0	0	0
ASB15	0	0	0	0
ASB16	0	0	0	0.285995
ASB17	0	0	0	0
ASB18	0	0	0	0.105213
ASB2	0	0	0	0.31187
ASB3	0	0	0	0
ASB4	0	0	0	0
ASB5	0	0	0	0.687793
ASB6	0	0	0	0
ASB7	0	0	0	0.525668
ASB8	0	0	0	0
ASB9	0	0	0	0
ASCC1	0	0	0.909818	0.909818
ASCC2	0	0	0	0.130154
ASCC3	0.507807	0	0	0.0184444
ASCL1	0	0	0	0.876878
ASCL2	0	0	0	0
ASCL3	0	0	0	0.597643
ASCL4	0	0	0	0.772146
ASCL5	0	0	0	0
ASDURF	0	0	0	0
ASF1A	0	0	0.9003	0
ASF1B	0	0	0.95	0.730457
ASGR1	0	0	0	0
ASGR2	0	0	0	0
ASH1L	0.391783	0.446343	0	0.002256
ASH2L	0	0	0	0.76405
ASIC1	0	0	0	0
ASIC2	0	0	0	0
ASIC3	0	0	0	0
ASIC4	0	0	0	0
ASIC5	0	0	0	0
ASIP	0	0	0	0
ASL	0	0	0.925903	0.925903
ASMT	0	0	0	0
ASMTL	0	0	0	0.10738
ASNA1	0	0	0	0.0286589
ASNS	0.69589	0.92318	0	0.438294
ASNSD1	0	0	0	0.14423
ASPA	0	0	0	0.376679
ASPDH	0	0	0	0
ASPG	0	0	0	0.170239
ASPH	0	0	0	0.0998094
ASPHD1	0	0	0	0.223606
ASPHD2	0	0	0	0
ASPM	0.887611	0	0	0.0222111
ASPN	0	0	0	0.491674
ASPRV1	0	0	0	0.811939
ASPSCR1	0	0	0	0.0811301
ASRGL1	0.293224	0	0	0.586624
ASS1	0.32629	0	0.9844	0.548883
ASTE1	0	0	0	0.690431
ASTL	0	0	0	0
ASTN1	0.15431	0.487718	0	0.835362
ASTN2	0.572874	0	0	0.0400667
ASXL1	0.17021	0.487718	0	0.732948
ASXL2	0	0	0	0.844737
ASXL3	0	0	0	0.0087608
ASZ1	0	0	0	0.335048
ATAD1	0	0	0	0.352403
ATAD2	0.120256	0	0	0.0044254
ATAD2B	0	0	0	0.2379
ATAD3A	0	0	0	0.148491
ATAD3B	0	0	0	0
ATAD3C	0	0	0	0.0003334
ATAD5	0.224935	0.549888	0	0.715153
ATAT1	0	0	0	0
ATCAY	0	0	0	0
ATE1	0	0	0	0.183922
ATF1	0	0	0	0.045958
ATF2	0.578778	0	0.9269	0.61277
ATF3	0.759011	0	0.95	0.892558
ATF4	0	0	0	0
ATF5	0.110891	0.986638	0.985809	0.985809
ATF6	0.703733	0	0	0.805998
ATF6B	0	0	0	0.0105423
ATF7	0	0	0	0.13863
ATF7IP	0	0.817591	0.7258	0.244622
ATF7IP2	0	0	0	0.179392
ATF7-NPFF	0	0	0	0
ATG10	0	0	0	0
ATG101	0	0	0	0
ATG12	0	0	0	0
ATG13	0	0	0	0
ATG14	0	0	0	0
ATG16L1	0	0	0	0.0631536
ATG16L2	0	0	0	0.450044
ATG2A	0.740214	0	0	4.52e-05
ATG2B	0.499565	0.723706	0	0.050247
ATG3	0	0	0	0.101212
ATG4A	0	0	0	0
ATG4B	0	0	0	0
ATG4C	0	0	0.974729	0.974729
ATG4D	0	0	0	0.360859
ATG5	0	0	0	0
ATG7	0	0	0	0
ATG9A	0	0	0	0.0171579
ATG9B	0	0	0	0
ATIC	0	0	0	0.289006
ATL1	0	0	0	0
ATL2	0	0	0	0
ATL3	0	0	0	0.539648
ATM	0.935401	0	0	0.588531
ATMIN	0	0	0	0
ATN1	0.322749	0.515402	0.7702	0.131548
ATOH1	0	0	0	0.476831
ATOH7	0	0	0	0
ATOH8	0	0	0	0
ATOX1	0	0	0	0
ATP10A	0	0	0	0.0410608
ATP10B	0	0	0	0.239037
ATP10D	0.578164	0.723706	0	0.0331023
ATP11A	0.139785	0.593643	0	0.515425
ATP11AUN	0	0	0	0
ATP11B	0	0	0	0.21698
ATP11C	0	0	0	8.5e-06
ATP12A	0	0	0	0.0703194
ATP13A1	0	0	0	0.262755
ATP13A2	0	0	0	0.102738
ATP13A3	0	0	0	0.230064
ATP13A4	0.8313	0	0	0.401707
ATP13A5	0.937303	0.723706	0	0.0957972
ATP1A1	0	0.92318	0.9959	0.471483
ATP1A2	0.901402	0.650126	0.967657	0.967657
ATP1A3	0.440784	0	0	0.577793
ATP1A4	0	0	0	0.139415
ATP1B1	0	0	0.9837	0.721053
ATP1B2	0	0	0	0.0817071
ATP1B3	0.14428	0	0	0.399543
ATP1B4	0	0	0	0.349341
ATP23	0	0	0	0
ATP2A1	0	0	0	4e-07
ATP2A2	0	0	0	0.728264
ATP2A3	0	0	0	0.0311565
ATP2B1	0.368477	0	0	0.688854
ATP2B2	0.832879	0.593643	0	0.858271
ATP2B3	0.852909	0.515402	0	0.179571
ATP2B4	0	0.817591	0.9576	0.718585
ATP2C1	0	0	0	0
ATP2C2	0	0	0	0.0377557
ATP4A	0.563778	0	0	0.103664
ATP4B	0	0	0	0.402734
ATP5F1A	0	0	0	0
ATP5F1B	0	0	0	0
ATP5F1C	0	0	0	0
ATP5F1D	0	0	0	0
ATP5F1E	0	0	0	0
ATP5IF1	0	0	0	0
ATP5MC1	0	0	0	0
ATP5MC2	0	0	0	0
ATP5MC3	0	0	0	0
ATP5MD	0	0	0	0
ATP5ME	0	0	0	0
ATP5MF	0	0	0	0
ATP5MF-PTCD1	0	0	0	0
ATP5MG	0	0	0	0
ATP5MGL	0	0	0	0
ATP5MPL	0	0	0	0
ATP5PB	0	0	0	0
ATP5PD	0	0	0	0
ATP5PF	0	0	0	0
ATP5PO	0	0	0	0
ATP6	0	0	0	0
ATP6	0	0	0	0
ATP6	0	0	0	0
ATP6AP1	0	0	0	0.121171
ATP6AP1L	0	0	0	0
ATP6AP2	0	0	0	0
ATP6V0A1	0	0	0	0.226077
ATP6V0A2	0	0	0	0.0799124
ATP6V0A4	0.977799	0.817591	0	0.749786
ATP6V0B	0	0	0	0
ATP6V0C	0	0	0	0
ATP6V0D1	0	0	0	0.372679
ATP6V0D2	0.395125	0	0	0.551749
ATP6V0E1	0	0	0	0
ATP6V0E2	0	0	0	0
ATP6V1A	0	0	0	0.232123
ATP6V1B1	0	0	0	0
ATP6V1B2	0	0	0	0.466985
ATP6V1C1	0	0	0	0.282419
ATP6V1C2	0	0	0	0.452196
ATP6V1D	0	0	0	0
ATP6V1E1	0	0	0	0
ATP6V1E2	0	0	0	0.72987
ATP6V1F	0	0	0	0
ATP6V1FNB	0	0	0	0
ATP6V1G1	0	0	0	0.685662
ATP6V1G2	0	0	0	0
ATP6V1G3	0	0	0	0
ATP6V1H	0	0	0	0.244747
ATP7A	0.429388	0	0	0.497736
ATP7B	0	0	0	0.134803
ATP8	0	0	0	0
ATP8	0	0	0	0
ATP8	0	0	0	0
ATP8A1	0	0	0	0.416637
ATP8A2	0.862667	0.723706	0	0.418426
ATP8B1	0	0	0	0.304337
ATP8B2	0	0	0	0.4424
ATP8B3	0	0	0	0.0033863
ATP8B4	0.574087	0.777642	0.982662	0.982662
ATP9A	0	0	0	0.0442361
ATP9B	0.8727	0	0	0.0220296
ATPAF1	0	0	0	0
ATPAF2	0	0	0	0.859849
ATPSCKMT	0	0	0	0
ATR	0	0	0	0.0403419
ATRAID	0	0	0	0
ATRIP	0	0	0	0
ATRN	0	0	0	0.0001822
ATRNL1	0	0	0	0.10734
ATRX	0.397676	0.417118	0	0.792533
ATXN1	0	0	0.8487	0.0042824
ATXN10	0	0	0	0.837967
ATXN1L	0	0	0	0.183303
ATXN2	0	0	0	0.103734
ATXN2L	0.626233	0	0	0.0773969
ATXN3	0	0	0	0.546827
ATXN3L	0	0	0	0.721201
ATXN7	0	0	0	0.237863
ATXN7L1	0	0	0	0.0460699
ATXN7L2	0	0	0	0.491489
ATXN7L3	0	0	0	0
ATXN7L3B	0	0	0	0
ATXN8	0	0	0	0
AUH	0	0	0.8205	0
AUNIP	0	0	0	0
AUP1	0	0	0	0.228976
AURKA	0.341541	0	0.8934	0.43338
AURKAIP1	0	0	0	0
AURKB	0.231244	0	0.8508	0.855209
AURKC	0	0	0	0.715722
AUTS2	0	0	0	0.0454612
AVEN	0	0	0	0
AVIL	0	0	0	0.185182
AVL9	0	0	0	0.207358
AVP	0	0	0	0
AVPI1	0	0	0	0.843873
AVPR1A	0.941926	0	0	0.493375
AVPR1B	0	0	0	0.243193
AVPR2	0	0	0	0
AWAT1	0	0	0	0
AWAT2	0	0	0	0.200523
AXDND1	0	0	0	0
AXIN1	0	0	0.8697	0.290499
AXIN2	0.9818	0	0	0.242446
AXL	0	0	0.9758	0
AZGP1	0	0	0	0.345641
AZI2	0	0	0	0.215198
AZIN1	0	0	0	0.484801
AZIN2	0	0	0	0
AZU1	0	0	0	0.52321
B2M	0	0	0.8042	0
B3GALNT1	0	0	0	0
B3GALNT2	0.338494	0	0	0.0343454
B3GALT1	0	0	0	0.751425
B3GALT2	0	0	0	0.2862
B3GALT4	0	0	0	0
B3GALT5	0	0	0	0
B3GALT6	0	0	0	0
B3GAT1	0	0	0	0.55411
B3GAT2	0	0	0	0
B3GAT3	0	0	0	0
B3GLCT	0	0	0	0
B3GNT2	0	0	0	0
B3GNT3	0	0	0	0
B3GNT4	0	0	0	0.409993
B3GNT5	0	0	0	0
B3GNT6	0	0	0.983842	0.983842
B3GNT7	0	0	0	0
B3GNT8	0	0	0	0
B3GNT9	0	0	0	0.387354
B3GNTL1	0	0	0	0
B4GALNT1	0	0	0	0.283205
B4GALNT2	0	0	0	0.856339
B4GALNT3	0.32061	0.92318	0	0.0923412
B4GALNT4	0.816052	0	0	0.720395
B4GALT1	0	0	0	0.747819
B4GALT2	0	0	0	0
B4GALT3	0	0	0	0.287266
B4GALT4	0.6794	0	0	0.880372
B4GALT5	0	0	0	0.579972
B4GALT6	0	0	0	0.389999
B4GALT7	0	0	0	0.634882
B4GAT1	0	0	0	0
B9D1	0	0	0	0
B9D2	0	0	0	0
BAALC	0.137875	0.993205	0.935289	0.935289
BAAT	0	0	0	0.270784
BABAM1	0	0	0	0
BABAM2	0	0	0	0
BACE1	0	0	0	0
BACE2	0	0	0	0.641648
BACH1	0	0	0	0.121506
BACH2	0.360649	0	0	0.412695
BAD	0	0	0.8744	0.826749
BAG1	0	0	0.9725	0.725358
BAG2	0	0	0	0
BAG3	0	0	0.9779	0
BAG4	0.53205	0	0.918627	0.918627
BAG5	0	0	0	0.192782
BAG6	0	0	0	0
BAGE	0	0	0	0
BAGE2	0	0	0	0
BAGE3	0	0	0	0
BAGE4	0	0	0	0
BAGE5	0	0	0	0
BAHCC1	0	0	0	0.346545
BAHD1	0	0	0	0.468093
BAIAP2	0.899402	0	0	0.0397137
BAIAP2L1	0	0	0	0
BAIAP2L2	0	0	0	0.282205
BAIAP3	0	0	0	0.0111517
BAK1	0	0	0	0.106621
BAMBI	0	0	0	0
BANF1	0	0	0	0.890034
BANF2	0	0	0	0.710119
BANK1	0	0	0	0.477659
BANP	0	0	0	0.559768
BAP1	0.485797	0.92318	0	0.672573
BARD1	0	0	0.738	0.599807
BARHL1	0	0	0	0.230333
BARHL2	0	0	0	0.444609
BARX1	0	0	0	0.322871
BARX2	0	0	0	0
BASP1	0	0	0	0
BATF	0.7864	0.954205	0.999661	0.999661
BATF2	0	0	0	0.397189
BATF3	0	0	0	0
BAX	0	0	0	0.440853
BAZ1A	0.233017	0	0	0.0477642
BAZ1B	0	0	0	0.197703
BAZ2A	0	0.817591	0	0.191068
BAZ2B	0.620314	0	0	0.015102
BBC3	0	0	0	0.351394
BBIP1	0	0	0	0
BBOF1	0	0	0	0
BBOX1	0	0	0	0.577038
BBS1	0	0	0	0.419588
BBS10	0	0	0	0.136509
BBS12	0.219571	0	0	0.526599
BBS2	0	0	0	0
BBS4	0	0	0	0.326535
BBS5	0	0	0.903353	0.903353
BBS7	0	0	0	0.204576
BBS9	0	0	0	0.128114
BBX	0	0	0	0.302513
BCAM	0	0	0	0.0379349
BCAN	0.647702	0	0	0.082912
BCAP29	0	0	0	0
BCAP31	0	0.817591	0	0.874019
BCAR1	0.513177	0	0.9715	0.54526
BCAR3	0	0	0	0
BCAS1	0	0	0	0.363257
BCAS2	0	0	0	0.461583
BCAS3	0.282496	0	0	0.672045
BCAS4	0.109609	0	0	0.331611
BCAT1	0	0	0	0
BCAT2	0	0	0	0.677149
BCCIP	0	0	0	0.489141
BCDIN3D	0	0	0	0.77767
BCHE	0	0	0	0.440314
BCKDHA	0	0	0.9553	0.2234
BCKDHB	0	0	0.9553	0.555688
BCKDK	0	0	0	0
BCL10	0	0	0.9451	0.837313
BCL11A	0	0	0	0.622006
BCL11B	0.730153	0.888495	0	5e-07
BCL2	0	0	0.9961	0
BCL2A1	0	0	0	0.497049
BCL2L1	0	0	0.9601	0
BCL2L10	0	0	0	0.565763
BCL2L11	0	0	0	0.702438
BCL2L12	0	0	0	0.324807
BCL2L13	0	0	0	0.352269
BCL2L14	0	0	0	0
BCL2L15	0	0	0	0
BCL2L2	0	0	0	0
BCL2L2-PABPN1	0	0	0	0
BCL3	0	0	0.960434	0.960434
BCL6	0.806357	0	0.926572	0.926572
BCL6B	0	0	0	0.118336
BCL7A	0.741192	0	0	0.802073
BCL7B	0	0	0	0
BCL7C	0.5859	0	0	0.704191
BCL9	0.311032	0	0	0.787832
BCL9L	0	0	0	0
BCLAF1	0.325732	0.650126	0	0.684081
BCLAF3	0	0	0	0
BCO1	0	0	0	0
BCO2	0	0	0	0.142744
BCOR	0.460632	0	0	0.0443843
BCORL1	0.191026	0	0	0.0759448
BCR	0.4995	0	0.9127	0.0058848
BCS1L	0	0	0	0.830498
BDH1	0	0	0	0
BDH2	0	0	0	0
BDKRB1	0.0232849	0	0	0.547523
BDKRB2	0	0	0.9421	0.3568
BDNF	0.642739	0.993205	0.969	0.628422
BDP1	0	0	0.9269	0.0006476
BEAN1	0	0	0	0
BECN1	0	0	0	0.117503
BECN2	0	0	0	0
BEGAIN	0.795875	0.967353	0	0.818318
BEND2	0.152046	0.817591	0	0.400846
BEND3	0	0	0	0.279164
BEND4	0	0	0	0.162322
BEND5	0	0	0	0
BEND6	0	0	0	0.388068
BEND7	0.0276104	0	0	0.539693
BEST1	0	0	0	0.440537
BEST2	0	0	0	0.0002012
BEST3	0	0	0	0.533666
BEST4	0	0	0	0
BET1	0	0	0	0
BET1L	0	0	0	0
BEX1	0	0	0	0
BEX2	0	0	0	0.863253
BEX3	0	0	0	0
BEX4	0	0	0	0
BEX5	0	0	0	0
BFAR	0.997926	0	0	0.500308
BFSP1	0	0	0	0.162461
BFSP2	0.298732	0	0	0.558562
BGLAP	0	0	0	0
BGN	0	0	0	0.592992
BHLHA15	0	0	0	0
BHLHA9	0	0	0	0
BHLHB9	0	0	0	0
BHLHE22	0.630783	0	0	0.581393
BHLHE23	0	0	0	0.820784
BHLHE40	0.287696	0	0	0.706925
BHLHE41	0	0	0	0
BHMG1	0	0	0	0
BHMT	0.409769	0	0	0.501559
BHMT2	0	0	0	0.27755
BICC1	0	0	0	0.0763597
BICD1	0.609389	0	0	0.461951
BICD2	0	0	0	0
BICDL1	0	0	0	0
BICDL2	0	0	0	0
BICRA	0	0	0	0
BICRAL	0	0	0	0
BID	0	0	0.7582	0
BIK	0	0	0	0.281693
BIN1	0	0	0	0.196191
BIN2	0	0	0	0.350782
BIN3	0	0	0	0
BIRC2	0	0	0	0.734534
BIRC3	0.234558	0	0	0.839946
BIRC5	0	0	0.8131	0.567387
BIRC6	0.238014	0	0	0.475887
BIRC7	0	0	0	0.849675
BIVM	0	0	0	0
BIVM-ERCC5	0	0	0	0
BLCAP	0	0	0	0
BLID	0	0	0	0.582444
BLK	0.521127	0	0	0.257744
BLM	0.5223	0	0	0.213084
BLMH	0	0	0	0.504939
BLNK	0	0.954205	0.979103	0.979103
BLOC1S1	0	0	0	0.501581
BLOC1S2	0	0	0	0
BLOC1S3	0	0	0	0
BLOC1S4	0	0	0	0
BLOC1S5	0	0	0	0
BLOC1S6	0	0	0	0
BLVRA	0	0	0	0.443711
BLVRB	0	0	0	0.480101
BLZF1	0	0	0	0.537863
BMF	0	0	0	0
BMI1	0	0	0	0
BMP1	0	0	0	0.0026731
BMP10	0	0	0	0
BMP15	0	0	0	0.79345
BMP2	0	0	0.98375	0.98375
BMP2K	0.00639159	0.723706	0	0.631153
BMP3	0	0.723706	0.96921	0.96921
BMP4	0.63873	0.888495	0	0.706313
BMP5	0	0	0	0.512485
BMP6	0	0	0	0.272051
BMP7	0	0	0	0.247912
BMP8A	0	0	0	0
BMP8B	0	0	0	0
BMPER	0	0	0	0.198647
BMPR1A	0	0	0	0
BMPR1B	0	0	0.9699	0
BMPR2	0	0	0.8202	0.356287
BMS1	0.487277	0	0	0.334553
BMT2	0	0	0	0
BMX	0	0	0.8833	0.153555
BNC1	0.749428	0.723706	0	0.399795
BNC2	0	0	0	0.0746866
BNIP1	0	0	0	0
BNIP2	0	0	0	0.824342
BNIP3	0	0	0	0.819374
BNIP3L	0	0	0	0.471339
BNIPL	0	0	0	0.308617
BOC	0	0	0	0.405939
BOD1	0	0	0	0
BOD1L1	0	0	0	0
BOD1L2	0	0	0	0
BOK	0	0	0	0
BOLA1	0	0	0	0.536182
BOLA2	0	0	0	0
BOLA2B	0	0	0	0
BOLA2-SMG1P6	0	0	0	0
BOLA3	0	0	0	0
BOLL	0	0	0	0
BOP1	0	0	0	0
BORA	0	0	0	0
BORCS5	0	0	0	0
BORCS6	0	0	0	0
BORCS7	0	0	0	0
BORCS8	0	0	0	0
BORCS8-MEF2B	0	0	0	0
BPGM	0	0	0	0
BPHL	0	0	0.931013	0.931013
BPI	0	0	0	0.244619
BPIFA1	0	0	0	0
BPIFA2	0	0	0	0
BPIFA3	0	0	0	0
BPIFB1	0	0	0	0
BPIFB2	0	0	0	0
BPIFB3	0	0	0	0
BPIFB4	0	0	0	0
BPIFB6	0	0	0	0
BPIFC	0	0	0	0
BPNT1	0	0	0	0.764797
BPTF	0.064388	0	0	0.0993592
BPY2	0	0	0	0
BPY2B	0	0	0	0
BPY2C	0	0	0	0
BRAF	0	0	0.8427	0.399082
BRAP	0	0	0	0
BRAT1	0	0.817591	0	0
BRCA1	0.955141	0.92318	0.9985	0.0353163
BRCA2	0.453712	0	0.8506	0.270821
BRCC3	0	0	0	0
BRD1	0.7674	0	0	0.0084842
BRD2	0	0	0	0.707311
BRD3	0.2459	0.723706	0	0.889894
BRD3OS	0	0	0	0
BRD4	0	0	0	0
BRD7	0	0	0	0.367627
BRD8	0.9709	0	0	0.759953
BRD9	0	0	0	0
BRDT	0	0	0	0
BRF1	0	0	0.9536	0
BRF2	0	0	0.8586	0.851266
BRI3	0	0	0	0
BRI3BP	0	0	0	0
BRICD5	0	0	0	0
BRINP1	0	0	0	0
BRINP2	0.15662	0	0	0
BRINP3	0	0	0	0
BRIP1	0	0	0	1.2e-05
BRIX1	0	0	0	0.283554
BRK1	0	0	0	0
BRMS1	0	0	0	0
BRMS1L	0	0	0	0.588648
BROX	0	0	0	0
BRPF1	0	0	0	0.0035736
BRPF3	0.240447	0	0	0.0343366
BRS3	0	0	0	0
BRSK1	0.101183	0	0	0.0884122
BRSK2	0	0	0	0.418103
BRWD1	0.8457	0.723706	0	0.817694
BRWD3	0.253968	0	0	0.342002
BSCL2	0	0	0	0
BSDC1	0	0	0	0
BSG	0	0	0	0
BSN	0.372885	0	0	0.0137374
BSND	0	0	0	0.0033027
BSPH1	0	0	0	0
BSPRY	0	0	0	0.772147
BST1	0	0	0	0
BST2	0	0	0	0
BSX	0	0	0	0.528716
BTAF1	0.362438	0	0	0.284834
BTBD1	0	0	0	0
BTBD10	0	0	0	0.608924
BTBD11	0	0	0	0.136885
BTBD16	0	0	0	0
BTBD17	0	0	0	0.887612
BTBD18	0	0	0	0.107323
BTBD19	0	0	0	0.403169
BTBD2	0	0	0	0
BTBD3	0	0	0	0
BTBD6	0	0	0	0.262558
BTBD7	0	0	0	0.0141236
BTBD8	0	0	0	0
BTBD9	0	0	0	0.159988
BTC	0	0	0	0.489733
BTD	0	0	0	0
BTF3	0	0	0	0
BTF3L4	0	0	0	0.63461
BTG1	0	0	0	0
BTG2	0	0	0	0.716753
BTG3	0	0	0	0
BTG4	0	0	0	0
BTK	0	0	0.9998	0
BTLA	0	0	0	0.567425
BTN1A1	0	0	0	0.651706
BTN2A1	0.217	0	0	0.869599
BTN2A2	0	0	0	0
BTN3A1	0	0	0	0.44524
BTN3A2	0	0	0	0.442848
BTN3A3	0.0255749	0.817591	0.912274	0.912274
BTNL10	0	0	0	0
BTNL2	0	0	0	0.224013
BTNL3	0	0	0	0
BTNL8	0.897785	0	0	0.0004234
BTNL9	0	0	0	0.40415
BTRC	0	0	0.8748	0.52393
BUB1	0	0	0	0.0690623
BUB1B	0.939484	0.888495	0.9137	0.373023
BUB1B-PAK6	0	0	0	0
BUB3	0	0	0.9058	0.6715
BUD13	0	0	0	0
BUD23	0	0	0	0
BUD31	0	0	0	0.470224
BVES	0	0	0	0
BYSL	0	0	0	0.845976
BZW1	0	0	0	0.247963
BZW2	0.978624	0.954205	0	0.699485
C10orf105	0	0	0	0
C10orf111	0	0	0	0
C10orf113	0	0	0	0
C10orf120	0	0	0	0
C10orf126	0	0	0	0
C10orf142	0	0	0	0
C10orf143	0	0	0	0
C10orf25	0	0	0	0
C10orf53	0	0	0	0
C10orf55	0	0	0	0.503974
C10orf62	0	0	0	0
C10orf67	0	0	0	0
C10orf71	0.383884	0	0	0.319083
C10orf82	0	0	0	0.877624
C10orf88	0	0	0	0
C10orf90	0	0	0	0.274442
C10orf95	0	0	0	0.77829
C10orf99	0	0	0	0.722557
C11orf1	0	0	0	0.623872
C11orf16	0.195298	0.888495	0	0.432257
C11orf21	0	0	0	0
C11orf24	0	0	0	0
C11orf40	0	0	0	0.484358
C11orf42	0	0	0	0.261199
C11orf44	0	0	0	0
C11orf45	0	0	0	0.837712
C11orf49	0	0	0	0.172688
C11orf52	0	0	0	0.244993
C11orf53	0	0	0	0.466141
C11orf54	0	0	0	0
C11orf58	0	0	0	0.540228
C11orf65	0	0	0	0
C11orf68	0	0	0	0
C11orf71	0	0	0	0.474606
C11orf74	0	0	0	0.450312
C11orf80	0	0	0	0.323589
C11orf86	0	0	0	0
C11orf87	0	0	0	0.458572
C11orf88	0	0	0	0.620516
C11orf91	0	0	0	0
C11orf94	0	0	0	0
C11orf95	0	0	0	0
C11orf96	0	0	0	0
C11orf97	0	0	0	0
C11orf98	0	0	0	0
C12orf10	0	0	0	0
C12orf29	0.9913	0.993205	0.984025	0.984025
C12orf4	0	0	0	0.36194
C12orf40	0	0	0	0.297302
C12orf42	0	0	0	0
C12orf43	0	0	0	0.458027
C12orf45	0	0	0	0
C12orf49	0	0	0	0.818797
C12orf50	0	0	0	0.50883
C12orf54	0	0	0	0
C12orf56	0.839497	0.723706	0	0.719837
C12orf57	0	0	0	0.0015536
C12orf60	0	0	0	0.337324
C12orf65	0	0	0	0.856502
C12orf66	0	0	0	0
C12orf71	0	0	0	0
C12orf73	0	0	0	0
C12orf74	0	0	0	0
C12orf75	0	0	0	0
C12orf76	0	0	0	0
C12orf77	0	0.92318	0	0.993299
C12orf80	0	0	0	0
C12orf81	0	0	0	0
C13orf42	0	0	0	0
C13orf46	0	0	0	0
C14orf119	0	0	0	0
C14orf132	0	0	0	0
C14orf177	0	0	0	0.492605
C14orf178	0	0	0	0
C14orf180	0	0	0	0
C14orf28	0	0	0	0.766328
C14orf39	0	0	0	0.290692
C14orf93	0	0	0	0.49209
C15orf32	0	0	0	0
C15orf39	0	0	0	0.3465
C15orf40	0	0	0	0
C15orf41	0	0	0	0
C15orf48	0	0	0	0
C15orf53	0	0	0	0
C15orf56	0	0	0	0
C15orf61	0	0	0	0
C15orf62	0	0	0	0
C15orf65	0	0	0	0
C16orf45	0	0	0	0.600087
C16orf46	0	0	0	0
C16orf47	0	0	0	0
C16orf54	0	0	0	0.430517
C16orf58	0	0	0	0.104966
C16orf70	0	0	0	0.367488
C16orf71	0.656735	0.817591	0	0.48031
C16orf72	0	0	0	0
C16orf74	0	0	0	0.77379
C16orf78	0	0	0	0
C16orf82	0	0	0	0
C16orf86	0	0.993205	0.986552	0.986552
C16orf87	0	0	0	0
C16orf89	0.125875	0	0	0.658955
C16orf90	0	0	0	0.610174
C16orf91	0	0	0	0
C16orf92	0	0	0	0
C16orf95	0	0	0	0
C16orf96	0	0	0	0
C16orf97	0	0	0	0
C17orf100	0	0	0	0
C17orf102	0	0	0.903187	0.903187
C17orf107	0	0	0	0
C17orf112	0	0	0	0
C17orf113	0	0	0	0
C17orf47	0	0	0	0.118116
C17orf49	0	0	0	0
C17orf50	0	0	0	0
C17orf51	0	0	0	0
C17orf53	0	0	0	0.222309
C17orf58	0	0	0	0
C17orf64	0	0	0	0
C17orf67	0	0	0	0.642351
C17orf75	0	0	0	0
C17orf77	0	0	0	0.752153
C17orf78	0	0	0	0.0932149
C17orf80	0	0	0	0.205244
C17orf82	0	0	0	0.0879549
C17orf97	0	0	0	0
C17orf98	0	0	0	0
C17orf99	0	0	0	0.476906
C18orf12	0	0	0	0
C18orf21	0	0	0	0
C18orf25	0	0	0	0.277008
C18orf32	0	0	0	0
C18orf54	0	0	0	0
C18orf63	0	0	0	0
C18orf65	0	0	0	0
C19orf12	0	0	0	0
C19orf18	0	0	0	0.330593
C19orf24	0	0	0	0
C19orf25	0	0	0	0
C19orf33	0	0	0	0
C19orf38	0	0	0	0.576338
C19orf44	0	0	0	0.36897
C19orf47	0	0	0	0
C19orf48	0	0	0	0
C19orf53	0	0	0	0.697692
C19orf54	0	0	0	0.437652
C19orf57	0	0	0	0.0989816
C19orf66	0	0	0	0.315054
C19orf67	0	0	0	0
C19orf71	0	0	0	0.437193
C19orf73	0	0	0	0
C19orf81	0	0	0	0
C19orf84	0	0	0	0
C19orf85	0	0	0	0
C1D	0	0	0	0
C1GALT1	0	0	0	0.786777
C1GALT1C1	0	0	0	0.33922
C1GALT1C1L	0	0	0	0
C1orf100	0	0	0	0
C1orf105	0	0	0	0.501812
C1orf109	0	0	0	0
C1orf112	0	0	0	0.268522
C1orf115	0	0	0	0
C1orf116	0.679097	0	0	0.256838
C1orf122	0	0	0	0
C1orf127	0	0	0	0.166927
C1orf131	0.429741	0	0	0.790221
C1orf134	0	0	0	0
C1orf141	0	0	0	0.414148
C1orf146	0	0	0	0
C1orf147	0	0	0	0
C1orf158	0	0	0	0.800806
C1orf159	0	0	0	0
C1orf162	0	0	0	0.645721
C1orf167	0	0	0	0
C1orf174	0	0	0	0
C1orf185	0	0	0	0.488606
C1orf189	0	0	0	0.663604
C1orf194	0	0	0	0
C1orf195	0	0	0	0
C1orf196	0	0	0	0
C1orf198	0	0	0	0
C1orf21	0.119098	0	0	0.864638
C1orf210	0	0	0	0.000199
C1orf216	0	0	0	0
C1orf226	0	0	0	0.39357
C1orf229	0	0	0	0.434929
C1orf232	0	0	0	0
C1orf35	0	0	0	0
C1orf43	0	0	0	0.338406
C1orf50	0	0	0	0
C1orf52	0	0	0	0
C1orf53	0	0	0	0
C1orf54	0	0	0	0
C1orf56	0	0	0	0.308488
C1orf61	0	0	0	0
C1orf68	0	0	0	0.596762
C1orf74	0	0	0	0.547945
C1orf87	0	0	0	0.001931
C1orf94	0	0	0	0.133403
C1QA	0	0	0	0.791401
C1QB	0	0	0	0
C1QBP	0	0	0.8427	0
C1QC	0	0	0	0.539818
C1QL1	0	0	0	0
C1QL2	0	0	0	0.555863
C1QL3	0	0	0	0
C1QL4	0	0	0	0.120134
C1QTNF1	0	0	0	0.808845
C1QTNF12	0	0	0	0
C1QTNF2	0.590798	0.817591	0	0.880521
C1QTNF3	0	0	0	0
C1QTNF4	0	0	0	0.582495
C1QTNF5	0	0	0	0
C1QTNF6	0	0	0	0
C1QTNF7	0	0	0	0
C1QTNF8	0	0	0	0.353416
C1QTNF9	0	0	0	0
C1QTNF9B	0	0	0	0
C1R	0	0	0	0.276737
C1RL	0	0	0	0.475416
C1S	0	0	0	0.379362
C2	0	0	0	0.0598475
C20orf141	0	0	0	0
C20orf144	0	0	0	0.830129
C20orf173	0	0	0	0
C20orf194	0	0	0	0.703078
C20orf197	0	0	0	0.701597
C20orf202	0	0	0	0
C20orf203	0	0	0	0
C20orf204	0	0	0	0
C20orf27	0	0	0	0.78486
C20orf78	0	0	0	0
C20orf85	0	0	0	0
C20orf96	0	0	0	0
C21orf58	0	0	0	0.894203
C21orf59-TCP10L	0	0	0	0
C21orf62	0	0	0	0
C21orf91	0	0	0	0
C22orf15	0	0	0	0
[truncated: 18,216 more rows]

## Sheet: Table S15
EARN: an ensemble machine learning algorithm to predict driver genes in metastatic breast cancer
Leila Mirsadeghi1, Reza Haji Hosseini1*, Ali Mohammad Banaei-Moghaddam2, Kaveh Kavousi3*
* Correspondence: kkavousi@ut.ac.ir; hosseini@pnu.ac.ir;
1Department of Biology, Faculty of Science, Payame Noor University, Tehran, Iran
2 Laboratory of Genomics and Epigenomics (LGE), Department of Biochemistry, Institute of Biochemistry and Biophysics (IBB), University of Tehran, Tehran, Iran
3 Laboratory of Complex Biological Systems and Bioinformatics (CBB), Department of Bioinformatics, Institute of Biochemistry and Biophysics (IBB), University of Tehran, Tehran, Iran
Additional file 6: Table S15 Five genes are common among the outputs obtained from four software tools (p-value≤0.05) regarding MBCA
C12orf29
OXCT1
PIK3CA
GCNT4
C8orf44

## Sheet: Table S16
EARN: an ensemble machine learning algorithm to predict driver genes in metastatic breast cancer
Leila Mirsadeghi1, Reza Haji Hosseini1*, Ali Mohammad Banaei-Moghaddam2, Kaveh Kavousi3*
* Correspondence: kkavousi@ut.ac.ir; hosseini@pnu.ac.ir;
1Department of Biology, Faculty of Science, Payame Noor University, Tehran, Iran
2 Laboratory of Genomics and Epigenomics (LGE), Department of Biochemistry, Institute of Biochemistry and Biophysics (IBB), University of Tehran, Tehran, Iran
3 Laboratory of Complex Biological Systems and Bioinformatics (CBB), Department of Bioinformatics, Institute of Biochemistry and Biophysics (IBB), University of Tehran, Tehran, Iran
Additional file 6: Table S16 18 genes are common among the outputs obtained from three software tools, including NetBox, MutsigCV, and OncodiveFM (p-value≤0.05) regarding MBCA
LILRA4
KCNAB3
PIAS3
SLC25A32
KIF14
SELE
ZNF546
APEX1
KANK4
GPD1L
SERPINE2
CDH1
STAG1
SPTB
NCOR1
TBX3
MRPS2
TP53

## Sheet: Table S17
EARN: an ensemble machine learning algorithm to predict driver genes in metastatic breast cancer
Leila Mirsadeghi1, Reza Haji Hosseini1*, Ali Mohammad Banaei-Moghaddam2, Kaveh Kavousi3*
* Correspondence: kkavousi@ut.ac.ir; hosseini@pnu.ac.ir;
1Department of Biology, Faculty of Science, Payame Noor University, Tehran, Iran
2 Laboratory of Genomics and Epigenomics (LGE), Department of Biochemistry, Institute of Biochemistry and Biophysics (IBB), University of Tehran, Tehran, Iran
3 Laboratory of Complex Biological Systems and Bioinformatics (CBB), Department of Bioinformatics, Institute of Biochemistry and Biophysics (IBB), University of Tehran, Tehran, Iran
Additional file 6: Table S17 23 genes are common among the outputs obtained from three software tools, including NetBox, MutsigCV, and OncodiveCLUST (p-value≤0.05) regarding MBCA
TOMM20
OR7A10
GCM2
KRAS
NRBP1
IQCF5
ATF5
ESR1
FLYWCH2
MME
THAP3
FUZ
C16orf86
BATF
BLNK
OR4X2
MAPK1
CYTL1
TTC29
MTO1
CDKN2A
AMIGO2
ARL6

## Sheet: Table S18
EARN: an ensemble machine learning algorithm to predict driver genes in metastatic breast cancer
Leila Mirsadeghi1, Reza Haji Hosseini1*, Ali Mohammad Banaei-Moghaddam2, Kaveh Kavousi3*
* Correspondence: kkavousi@ut.ac.ir; hosseini@pnu.ac.ir;
1Department of Biology, Faculty of Science, Payame Noor University, Tehran, Iran
2 Laboratory of Genomics and Epigenomics (LGE), Department of Biochemistry, Institute of Biochemistry and Biophysics (IBB), University of Tehran, Tehran, Iran
3 Laboratory of Complex Biological Systems and Bioinformatics (CBB), Department of Bioinformatics, Institute of Biochemistry and Biophysics (IBB), University of Tehran, Tehran, Iran
Additional file 6: Table S18 17 genes are common among the outputs obtained from two software tools, including OncodriveFM and OncodiveCLUST (p-value≤0.05) regarding MBCA
YIF1B
FFAR3
HTR3A
STOML3
WNT6
CPSF3
KLK4
SCCPDH
OR5M3
DOC2A
TMBIM1
CALCR
BZW2
ZNF99
GH1
CYP4B1
PDLIM5

## Sheet: Table S19
EARN: an ensemble machine learning algorithm to predict driver genes in metastatic breast cancer
Leila Mirsadeghi1, Reza Haji Hosseini1*, Ali Mohammad Banaei-Moghaddam2, Kaveh Kavousi3*
* Correspondence: kkavousi@ut.ac.ir; hosseini@pnu.ac.ir;
1Department of Biology, Faculty of Science, Payame Noor University, Tehran, Iran
2 Laboratory of Genomics and Epigenomics (LGE), Department of Biochemistry, Institute of Biochemistry and Biophysics (IBB), University of Tehran, Tehran, Iran
3 Laboratory of Complex Biological Systems and Bioinformatics (CBB), Department of Bioinformatics, Institute of Biochemistry and Biophysics (IBB), University of Tehran, Tehran, Iran
Additional file 6: Table S19 Two genes are common among the outputs obtained from two software tools, including OncodriveFM and MutsigCV (p-value≤0.05) regarding MBCA
ARHGEF38
UQCR10

## Sheet: Table S20
EARN: an ensemble machine learning algorithm to predict driver genes in metastatic breast cancer
Leila Mirsadeghi1, Reza Haji Hosseini1*, Ali Mohammad Banaei-Moghaddam2, Kaveh Kavousi3*
* Correspondence: kkavousi@ut.ac.ir; hosseini@pnu.ac.ir;
1Department of Biology, Faculty of Science, Payame Noor University, Tehran, Iran
2 Laboratory of Genomics and Epigenomics (LGE), Department of Biochemistry, Institute of Biochemistry and Biophysics (IBB), University of Tehran, Tehran, Iran
3 Laboratory of Complex Biological Systems and Bioinformatics (CBB), Department of Bioinformatics, Institute of Biochemistry and Biophysics (IBB), University of Tehran, Tehran, Iran
Additional file 6: Table S20 Eight genes are common among the outputs obtained from two software tools, including OncodriveFM and NetBox (p-value≤0.05) regarding MBCA
BRCA1
SPTAN1
PLD1
RALGDS
STAT5B
PTPRJ
AR
SDHA

## Sheet: Table S21
EARN: an ensemble machine learning algorithm to predict driver genes in metastatic breast cancer
Leila Mirsadeghi1, Reza Haji Hosseini1*, Ali Mohammad Banaei-Moghaddam2, Kaveh Kavousi3*
* Correspondence: kkavousi@ut.ac.ir; hosseini@pnu.ac.ir;
1Department of Biology, Faculty of Science, Payame Noor University, Tehran, Iran
2 Laboratory of Genomics and Epigenomics (LGE), Department of Biochemistry, Institute of Biochemistry and Biophysics (IBB), University of Tehran, Tehran, Iran
3 Laboratory of Complex Biological Systems and Bioinformatics (CBB), Department of Bioinformatics, Institute of Biochemistry and Biophysics (IBB), University of Tehran, Tehran, Iran
Additional file 6: Table S21 Five genes are common among the outputs obtained from two software tools, including OncodriveCLUST and NetBox (p-value≤0.05) regarding MBCA
BDNF
NRIP1
PRKCD
HDAC3
MAP4K1

## Sheet: Table S22
EARN: an ensemble machine learning algorithm to predict driver genes in metastatic breast cancer
Leila Mirsadeghi1, Reza Haji Hosseini1*, Ali Mohammad Banaei-Moghaddam2, Kaveh Kavousi3*
* Correspondence: kkavousi@ut.ac.ir; hosseini@pnu.ac.ir;
1Department of Biology, Faculty of Science, Payame Noor University, Tehran, Iran
2 Laboratory of Genomics and Epigenomics (LGE), Department of Biochemistry, Institute of Biochemistry and Biophysics (IBB), University of Tehran, Tehran, Iran
3 Laboratory of Complex Biological Systems and Bioinformatics (CBB), Department of Bioinformatics, Institute of Biochemistry and Biophysics (IBB), University of Tehran, Tehran, Iran
Additional file 6: Table S22 256 genes are common among the outputs obtained from two software tools, including MutsigCV and NetBox (p-value≤0.05) regarding MBCA
SLC18A1
HSPB8
EHF
PTEN
SLC6A11
LZTR1
C2orf73
TMEM42
SOD2
ING3
SLC22A2
ZNF219
BMP3
SNX16
PDCD5
OR4A15
DSCC1
YIPF4
PLCG1
PLP2
STARD5
CACNA1E
THYN1
SNTG1
PLTP
HIST1H1E
ZBTB48
TAF7L
NRARP
F2RL1
CDKN1B
HIST1H3B
PLEKHG7
PTHLH
SAMSN1
NDUFS4
ADAM19
LCN12
PAX9
TNNC2
TMEM161B
CRYBA4
NME1-NME2
OR10K1
POF1B
SIRT4
GIP
PRRG4
VPS25
ARMC8
CHI3L1
CEACAM18
CAPN12
LSM10
SPRY2
RUNX1
ABHD15
ALPP
KLF4
KRCC1
GPR119
RRAS2
PPM1H
TOMM20L
DPM3
VRK2
SNAP25
MOCS3
PDSS1
MS4A13
TCF21
ATP8B4
OR10T2
PDGFD
PREX2
UNC13D
PARK7
LMOD1
MPI
SUPT3H
HIST1H3E
NFKBIZ
NKX2-8
SPP1
ENKUR
RUVBL1
VAX1
MYL10
MAP1A
MYO5A
TMEM176A
MAP4K3
OR13C3
MPHOSPH8
KRTAP4-2
USP11
CTH
KDM6B
WAS
E2F4
BMP2
PCDH15
HIST1H3G
PCDHGB2
CSNK1D
CRYGN
MAP2K4
CSMD1
PLEKHH2
TBCCD1
DERL2
NFIC
KCTD2
MCEE
MAP3K1
KCTD9
CNKSR2
FSD1
PDE1A
HIST2H2AC
KIAA0556
CDC40
SNAPIN
ENTPD5
LGALS2
RGS2
CD1B
EFNA5
CBFB
SKAP1
SLU7
SLC35F5
GATA3
PIGH
ITGA2B
SMURF1
ATP1A2
MMP8
LRRC24
SPANXN5
MSH4
PRKG1
PPP3R1
IQCA1
PALB2
UBL3
FABP1
CD99L2
EGFR
ZNF268
ZFP36L1
COLEC10
WNT2
FOXA1
ABI1
RETN
CCDC82
ATG4C
ESF1
ZDHHC5
ABAT
RBBP7
CHIC2
HSP90AB1
RPL18
CARTPT
KCNU1
ZNF853
NOS3
MYL5
SLC24A1
RB1
GGCT
PLXNB2
HBM
SRC
RHBDF2
XBP1
KNG1
TFAP2A
IRF2
RASL10A
MBNL3
SLITRK2
PRSS16
RBM18
PRPF38A
FBXO4
CD1E
EPS8L2
PLEKHH3
MRPL21
PEX10
EFCAB2
B3GNT6
ARHGAP6
HMMR
SNX1
JMJD8
ITCH
DAP
GABRA5
AKT1
PIK3R1
PTPN3
DOK5
DMD
FGD3
GHRHR
RHPN2
TMX2
PITX3
SNX12
WFDC8
BCL3
REN
FCRLA
PIP5K1B
COL6A1
RLIM
ST3GAL5
ZNF207
ZNF592
ZNF579
SREBF1
SERPINC1
PWWP2B
IGFBP4
TRIT1
TMEM119
EFCAB1
CRIP3
SERP2
COX7C
ZNF804A
DNAJC24
TMLHE
NAGK
HCRT
CDA
TXNDC17
DNAI2
CD3E
GPS2
GLT6D1
PHF11
CYP3A4
ARID1A
FMN2
TRMT5
CMTM7
FAM49B
DRG2
MAPK8IP1
SNCB
CDYL

[truncated: 4 more sheets: Table S23, Table S24, Table S25, Table S26]
